# Supplementary material for: Highly efficient construction of 2,3-disubstituted indoline derivatives by [4 + 1] annulation of sulfur ylides and o-sulfonamido aldimines
Source: Royal Society of Chemistry journal article supplement (doi:10.1039/d2qo01966c), 2023-01-01
Supplement: d2qo01966c1.pdf [file d2qo01966c1.pdf]

## Supporting Information

### Table of Contents

|                                                             |     |
|-------------------------------------------------------------|-----|
| 1. General Information                                      | S2  |
| 2. General procedure for the synthesis of products          | S3  |
| 3. General procedure for the transformations of 3a          | S4  |
| 4. Crystal structures of 3a                                 | S5  |
| 5. Characterization of substrates and Products              | S7  |
| 6. Reference                                                | S27 |
| 7. <sup>1</sup> H NMR, <sup>13</sup> C NMR and HPLC Spectra | S28 |

## 1. General Information

Commercially available materials purchased from Bidepharm or Energy Chemical was used as received. Unless otherwise specified, all reactions were carried out under an atmosphere of nitrogen in 10 mL Schlenk tube.  $^1\text{H}$  NMR,  $^{13}\text{C}$  NMR spectra were measured at 400/600 MHz and 100/150 MHz in  $\text{CDCl}_3$ . Data for  $^1\text{H}$  NMR spectra are reported as follows: chemical shift (ppm, referenced to TMS; s = singlet, d = doublet, t = triplet, dd = doublet of doublets, dt = doublet of triplets, m = multiplet), coupling constant (Hz), and integration. Data for  $^{13}\text{C}$  NMR are reported in terms of chemical shift (ppm) relative to residual solvent peak ( $\text{CDCl}_3$ : 77.16 ppm). High-resolution mass spectrometry (HRMS) analysis was carried out using a TOF MS instrument with ESI. Reactions were monitored by thin layer chromatography (TLC) using silicycle pre-coated silica gel plates. Flash column chromatography was performed on silica gel (particle size 200-300 mesh ASTM, purchased from Anhui Liangchen Silicon Material Co., Ltd.) and eluted with petroleum ether/ethyl acetate/dichloromethane.

## 2. General procedure for the synthesis of products

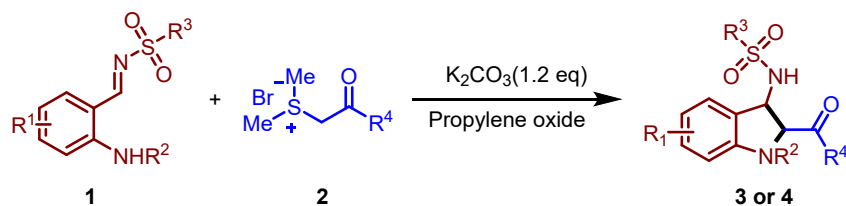

In a flame dried 10 mL round bottom flask, compound **1** (0.2 mmol) was suspended in anhydrous propylene oxide (2.0 mL), then sulfur ylide salt **2** (0.24 mmol) and  $K_2CO_3$  (33.1 mg, 0.24 mmol) were added to the system. After that the mixture was stirred at room temperature until the reaction was complete (12 h, determined by TLC analysis). The mixture was concentrated under vacuum and purified by flash column chromatography on silica gel (PE:EA:DCM = 5:1:1 to 30:1:1) to give the pure products **3/4** in good yields. All the products were confirmed by  $^1H$  NMR,  $^{13}C$  NMR spectra.

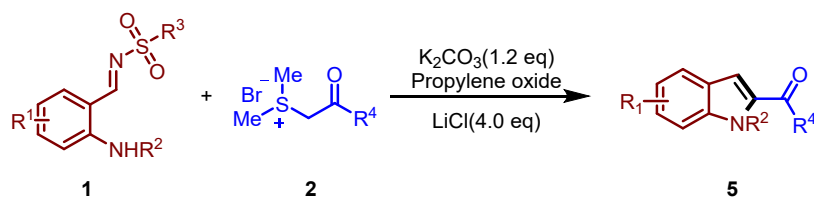

In a flame dried 10 mL round bottom flask, compound **1** (0.2 mmol) was suspended in anhydrous propylene oxide (2.0 mL), then sulfur ylide salt **2** (0.24 mmol) and  $K_2CO_3$  (33.1 mg, 0.24 mmol) were added to the system. When the reaction was completed (monitored by TLC),  $LiCl$  (34.4 mg, 0.8 mmol) was added to the system. After that the mixture was stirred at room temperature until the reaction was complete (12 h, determined by TLC analysis). The mixture was concentrated under vacuum and purified by flash column chromatography on silica gel (PE:EA:DCM = 5:1:1 to 30:1:1) to give the pure products **5** in good yields. All the products were confirmed by  $^1H$  NMR,  $^{13}C$  NMR spectra.

### 3. General procedure for the transformations of **3a**<sup>1</sup>

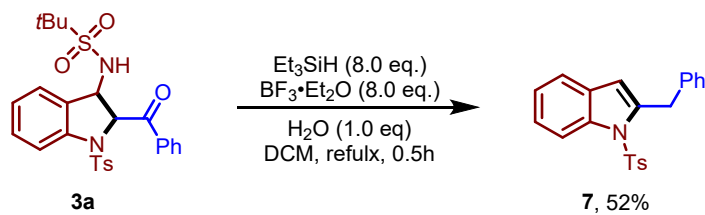

Under N<sub>2</sub> atmosphere, a flame-dried 10 mL Schlenk tube was charged with **3a** (102.4 mg, 0.2 mmol), and anhydrous DCM (2.0 mL). Then Et<sub>3</sub>SiH (186.0 mg, 1.6 mmol), BF<sub>3</sub>·Et<sub>2</sub>O (48% wt, 266.7 mg, 1.6 mmol) and H<sub>2</sub>O (3.6 mg, 0.2 mmol) were added. The resulting solution was heated to reflux for 0.5 h. The reaction was cooled to room temperature and H<sub>2</sub>O (2.0 mL) was added. The resulting solution was extracted with DCM (3×5 mL). The combined organic layers were dried over Na<sub>2</sub>SO<sub>4</sub>, filtered and concentrated in vacuo. Then the residue was purified by flash silica gel chromatography (PE:EA = 40:1) to afford the desired compound **7** as a yellow solid (37.5 mg, 52% yield).

## 4. Crystal structure of 3a

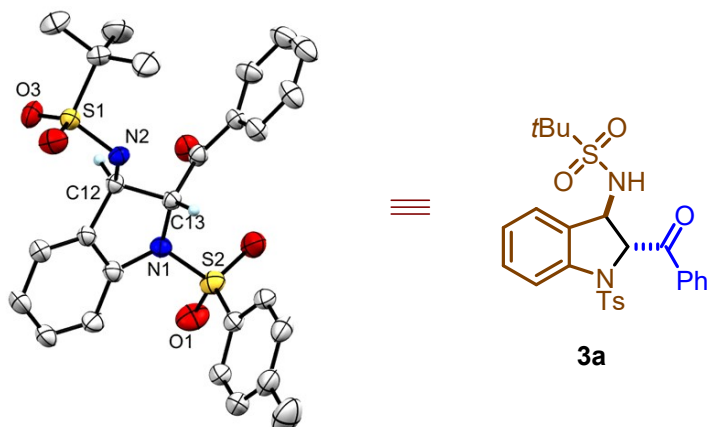

|                                    |                                                                              |
|------------------------------------|------------------------------------------------------------------------------|
| CCDC number                        | 2222675                                                                      |
| Identification code                | <b>3a</b>                                                                    |
| Empirical formula                  | C <sub>26</sub> H <sub>28</sub> N <sub>2</sub> O <sub>5</sub> S <sub>2</sub> |
| Formula weight                     | 512.62                                                                       |
| Temperature/K                      | 273.15                                                                       |
| Crystal system                     | monoclinic                                                                   |
| Space group                        | P2 <sub>1</sub>                                                              |
| a/Å                                | 11.3455(3)                                                                   |
| b/Å                                | 19.4855(4)                                                                   |
| c/Å                                | 12.0067(3)                                                                   |
| α/°                                | 90                                                                           |
| β/°                                | 97.6140(10)                                                                  |
| γ/°                                | 90                                                                           |
| Volume/Å <sup>3</sup>              | 2630.95(11)                                                                  |
| Z                                  | 4                                                                            |
| ρ <sub>calc</sub> /cm <sup>3</sup> | 1.294                                                                        |
| μ/mm <sup>-1</sup>                 | 0.241                                                                        |
| F(000)                             | 1080.0                                                                       |
| Crystal size/mm <sup>3</sup>       | 0.12 × 0.11 × 0.1                                                            |
| Radiation                          | MoKα (λ = 0.71073)                                                           |
| 2θ range for data collection/°     | 5.092 to 54.998                                                              |
| Index ranges                       | -14 ≤ h ≤ 13, -22 ≤ k ≤ 25, -15 ≤ l ≤ 15                                     |
| Reflections collected              | 27597                                                                        |
| Independent reflections            | 11272 [R <sub>int</sub> = 0.0478, R <sub>sigma</sub> = 0.0602]               |
| Data/restraints/parameters         | 11272/1/643                                                                  |
| Goodness-of-fit on F <sup>2</sup>  | 1.035                                                                        |
| Final R indexes [I ≥ 2σ (I)]       | R <sub>1</sub> = 0.0471, wR <sub>2</sub> = 0.0932                            |

Final R indexes [all data]  $R_1 = 0.0882$ ,  $wR_2 = 0.1130$   
Largest diff. peak/hole /  $e \text{ \AA}^{-3}$  0.15/-0.23  
Flack parameter -0.01(3)

## 5. Characterization of substrates and products

### (E)-N-(2-(((tert-butylsulfonyl)imino)methyl)phenyl)-4-methylbenzenesulfonamide(1a)<sup>2</sup>

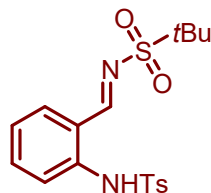

<sup>1</sup>H NMR (600 MHz, CDCl<sub>3</sub>) δ 11.08 (s, 1H), 9.00 (s, 1H), 7.79 (d, *J* = 7.2 Hz, 2H), 7.69 (d, *J* = 8.4 Hz, 1H), 7.58 – 7.50 (m, 2H), 7.26 (d, *J* = 7.0 Hz, 2H), 7.15 (t, *J* = 7.5 Hz, 1H), 2.37 (s, 3H), 1.56 (s, 9H).  
<sup>13</sup>C NMR (151 MHz, CDCl<sub>3</sub>) δ 173.11, 144.57, 141.13, 137.68, 136.33, 136.26, 130.01, 127.43, 123.23, 118.23, 117.87, 58.88, 24.12, 21.67. HRMS (ESI) calcd. for C<sub>18</sub>H<sub>23</sub>N<sub>2</sub>O<sub>4</sub>S<sub>2</sub> [M+H<sup>+</sup>]: 395.1094, found: 395.1095.

### (E)-N-(2-(((tert-butylsulfonyl)imino)methyl)-4-fluorophenyl)-4-methylbenzenesulfonamide(1b)

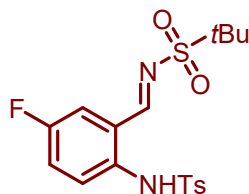

<sup>1</sup>H NMR (400 MHz, CDCl<sub>3</sub>) δ 10.78 (s, 1H), 8.93 (s, 1H), 7.78 – 7.69 (m, 3H), 7.32 – 7.23 (m, 4H), 2.38 (s, 3H), 1.55 (s, 9H). <sup>13</sup>C NMR (101 MHz, CDCl<sub>3</sub>) δ 171.93, 158.09 (d, *J* = 245.6 Hz), 144.72, 137.26, 136.02, 128.73 (d, *J* = 270.3 Hz), 123.52, 123.29, 122.44 (d, *J* = 23.0 Hz), 120.55 (d, *J* = 7.3 Hz), 119.62 (d, *J* = 6.7 Hz), 59.04, 24.08, 21.68. HRMS (ESI) calcd. for C<sub>18</sub>H<sub>22</sub>FN<sub>2</sub>O<sub>4</sub>S<sub>2</sub> [M+H<sup>+</sup>]: 413.1000, found: 413.1002 .

### (E)-N-(2-(((tert-butylsulfonyl)imino)methyl)-4-chlorophenyl)-4-methylbenzenesulfonamide(1c)

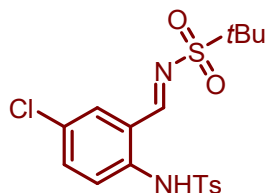

<sup>1</sup>H NMR (600 MHz, CDCl<sub>3</sub>) δ 10.97 (s, 1H), 8.94 (s, 1H), 7.76 (d, *J* = 7.8 Hz, 2H), 7.68 (d, *J* = 8.9 Hz, 1H), 7.54 (s, 1H), 7.47 (d, *J* = 8.9 Hz, 1H), 7.27 (d, *J* = 7.7 Hz, 2H), 2.39 (s, 3H), 1.55 (s, 9H). <sup>13</sup>C NMR (151 MHz, CDCl<sub>3</sub>) δ 171.99, 144.84, 139.55, 136.32, 136.03, 135.89, 130.13, 128.56, 127.41,

119.55, 119.44, 59.06, 24.10, 21.70. HRMS (ESI) calcd. for  $C_{18}H_{22}ClN_2O_4S_2$   $[M+H]^+$ : 429.0704, found: 429.0706.

**(E)-N-(2-(((tert-butylsulfonyl)imino)methyl)-4-methylphenyl)-4-methylbenzenesulfonamide(1d)**

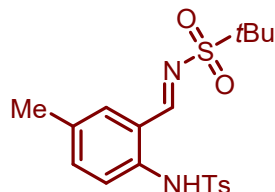

$^1H$  NMR (400 MHz,  $CDCl_3$ )  $\delta$  9.18 (s, 1H), 8.02 (s, 1H), 7.89 (d,  $J = 7.2$  Hz, 1H), 7.48 (d,  $J = 7.6$  Hz, 2H), 7.42 (d,  $J = 6.8$  Hz, 1H), 7.31 (t,  $J = 7.5$  Hz, 1H), 7.18 (d,  $J = 7.5$  Hz, 2H), 2.37 (s, 3H), 2.04 (s, 3H), 1.49 (s, 9H).  $^{13}C$  NMR (101 MHz,  $CDCl_3$ )  $\delta$  172.61, 144.39, 137.40, 137.36, 137.24, 135.96, 130.09, 129.91, 129.79, 127.58, 127.50, 58.73, 24.20, 21.72, 18.17. HRMS (ESI) calcd. for  $C_{19}H_{25}N_2O_4S_2$   $[M+H]^+$ : 409.1250, found: 409.1266.

**(E)-N-(5-bromo-2-(((tert-butylsulfonyl)imino)methyl)phenyl)-4-methylbenzenesulfonamide(1e)**

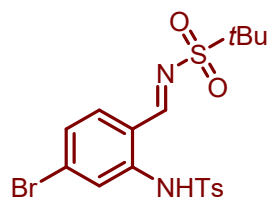

$^1H$  NMR (400 MHz,  $CDCl_3$ )  $\delta$  11.16 (s, 1H), 8.95 (s, 1H), 7.89 (s, 1H), 7.80 (d,  $J = 7.7$  Hz, 2H), 7.39 (d,  $J = 8.1$  Hz, 1H), 7.31 (d,  $J = 8.2$  Hz, 3H), 2.40 (s, 3H), 1.55 (s, 9H).  $^{13}C$  NMR (101 MHz,  $CDCl_3$ )  $\delta$  172.21, 144.96, 141.80, 138.37, 135.92, 131.96, 130.18, 127.42, 126.61, 120.85, 116.85, 58.97, 24.09, 21.71. HRMS (ESI) calcd. for  $C_{18}H_{22}BrN_2O_4S_2$   $[M+H]^+$ : 473.0199, found: 473.0201.

**(E)-N-(2-(((tert-butylsulfonyl)imino)methyl)-6-chlorophenyl)-4-methylbenzenesulfonamide(1f)**

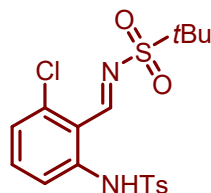

$^1H$  NMR (600 MHz,  $CDCl_3$ )  $\delta$  11.65 (s, 1H), 9.67 (s, 1H), 7.78 (d,  $J = 8.3$  Hz, 2H), 7.62 (d,  $J = 8.6$  Hz, 1H), 7.42 (t,  $J = 8.3$  Hz, 1H), 7.28 (d,  $J = 8.1$  Hz, 2H), 7.14 (dd,  $J = 8.0, 0.8$  Hz, 1H), 2.39 (s, 3H), 1.58 (s, 9H).  $^{13}C$  NMR (151 MHz,  $CDCl_3$ )  $\delta$  170.42, 144.86, 143.11, 141.14, 136.59, 136.04, 130.13, 127.48,



124.58, 116.44, 115.16, 59.04, 24.16, 21.74. HRMS (ESI) calcd. for  $C_{18}H_{22}ClN_2O_4S_2$   $[M+H]^+$ : 429.0704, found: 429.0705.

**(E)-N-(2-(((tert-butylsulfonyl)imino)methyl)-6-methylphenyl)-4-methylbenzenesulfonamide(1g)**

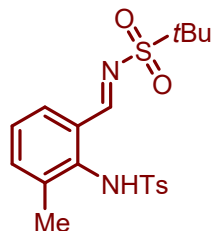

$^1H$  NMR (400 MHz,  $CDCl_3$ )  $\delta$  10.89 (s, 1H), 8.95 (s, 1H), 7.76 (d,  $J = 8.2$  Hz, 2H), 7.61 (d,  $J = 9.0$  Hz, 1H), 7.36 – 7.31 (m, 2H), 7.25 (d,  $J = 8.1$  Hz, 2H), 2.37 (s, 3H), 2.31 (s, 3H), 1.55 (s, 9H).  $^{13}C$  NMR (101 MHz,  $CDCl_3$ )  $\delta$  173.22, 144.39, 138.67, 137.68, 137.17, 136.37, 133.12, 129.94, 127.40, 118.37, 118.27, 58.80, 24.11, 21.65, 20.38. HRMS (ESI) calcd. for  $C_{19}H_{25}N_2O_4S_2$   $[M+H]^+$ : 409.1250, found: 409.1258.

**(E)-N-(2-(((tert-butylsulfonyl)imino)methyl)-4,5-dimethoxyphenyl)-4-methylbenzenesulfonamide(1h)**

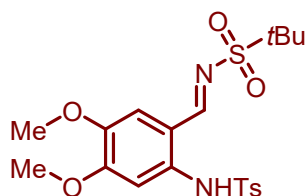

$^1H$  NMR (400 MHz,  $CDCl_3$ )  $\delta$  11.08 (s, 1H), 8.85 (s, 1H), 7.74 (d,  $J = 8.3$  Hz, 2H), 7.31 (s, 1H), 7.25 (d,  $J = 8.1$  Hz, 2H), 6.91 (s, 1H), 3.96 (s, 3H), 3.84 (s, 3H), 2.37 (s, 3H), 1.53 (s, 9H).  $^{13}C$  NMR (101 MHz,  $CDCl_3$ )  $\delta$  171.50, 155.93, 145.25, 144.54, 137.56, 136.22, 129.98, 127.39, 117.43, 111.09, 101.97, 58.64, 56.61, 56.32, 24.15, 21.66. HRMS (ESI) calcd. for  $C_{20}H_{27}N_2O_6S_2$   $[M+H]^+$ : 455.1305, found: 455.1312.

**(E)-2-methyl-N-(2-(methylsulfonamido)benzylidene)propane-2-sulfonamide(1i)**

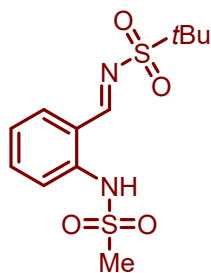

$^1\text{H}$  NMR (400 MHz,  $\text{CDCl}_3$ )  $\delta$  10.89 (s, 1H), 9.09 (s, 1H), 7.90 – 7.54 (m, 3H), 7.26 (d,  $J$  = 6.7 Hz, 1H), 3.18 (s, 3H), 1.52 (s, 9H).  $^{13}\text{C}$  NMR (101 MHz,  $\text{CDCl}_3$ )  $\delta$  173.22, 141.31, 138.07, 136.65, 123.23, 117.91, 116.98, 58.91, 40.83, 24.06. HRMS (ESI) calcd. for  $\text{C}_{12}\text{H}_{19}\text{N}_2\text{O}_4\text{S}_2$  [ $\text{M}+\text{H}^+$ ]: 319.0781, found: 319.0778.

**(E)-N-(2-(((tert-butylsulfonyl)imino)methyl)phenyl)benzenesulfonamide(1j)**

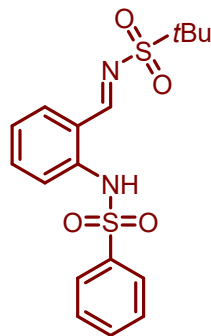

$^1\text{H}$  NMR (600 MHz,  $\text{CDCl}_3$ )  $\delta$  11.14 (s, 1H), 9.01 (s, 1H), 7.94 – 7.90 (m, 2H), 7.71 (d,  $J$  = 8.4 Hz, 1H), 7.59 – 7.52 (m, 3H), 7.49 (t,  $J$  = 7.8 Hz, 2H), 7.20 – 7.15 (m, 1H), 1.56 (s, 9H).  $^{13}\text{C}$  NMR (151 MHz,  $\text{CDCl}_3$ )  $\delta$  173.12, 140.98, 139.28, 137.71, 136.30, 133.57, 129.42, 127.37, 123.39, 118.29, 117.94, 58.90, 24.13. HRMS (ESI) calcd. for  $\text{C}_{17}\text{H}_{21}\text{N}_2\text{O}_4\text{S}_2$  [ $\text{M}+\text{H}^+$ ]: 381.0937, found: 381.0936.

**(E)-N-(2-(((tert-butylsulfonyl)imino)methyl)phenyl)-4-nitrobenzenesulfonamide(1k)**

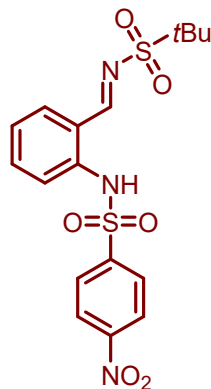

<sup>1</sup>H NMR (400 MHz, CDCl<sub>3</sub>) δ 11.29 (s, 1H), 9.00 (s, 1H), 8.36 – 8.28 (m, 2H), 8.11 – 8.05 (m, 2H), 7.73 (d, *J* = 8.2 Hz, 1H), 7.63 – 7.57 (m, 2H), 7.25 (td, *J* = 7.6, 0.8 Hz, 1H), 1.57 (s, 9H). <sup>13</sup>C NMR (101 MHz, CDCl<sub>3</sub>) δ 173.10, 150.56, 144.78, 140.02, 137.91, 136.46, 128.72, 124.67, 124.40, 118.84, 118.47, 58.97, 24.09. HRMS (ESI) calcd. for C<sub>17</sub>H<sub>20</sub>N<sub>3</sub>O<sub>6</sub>S<sub>2</sub> [M+H<sup>+</sup>]: 426.0788, found: 426.0791.

### N-(2-benzoyl-1-tosylindolin-3-yl)-2-methylpropane-2-sulfonamide(3a)

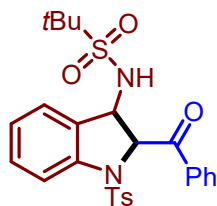

Isolated in 81% yield (83.0 mg) as white solid, mp 180.2 – 181.4 °C.

<sup>1</sup>H NMR (400 MHz, CDCl<sub>3</sub>) δ 8.08 (d, *J* = 7.6 Hz, 2H), 7.68 – 7.59 (m, 4H), 7.50 (t, *J* = 7.6 Hz, 2H), 7.38 (t, *J* = 6.7 Hz, 2H), 7.27 (d, *J* = 7.1 Hz, 2H), 7.15 (t, *J* = 7.4 Hz, 1H), 5.54 (d, *J* = 2.5 Hz, 1H), 4.92 (dd, *J* = 10.1, 1.9 Hz, 1H), 3.36 (d, *J* = 10.2 Hz, 1H), 2.36 (s, 3H), 1.26 (s, 9H). <sup>13</sup>C NMR (101 MHz, CDCl<sub>3</sub>) δ 194.66, 145.20, 141.87, 134.61, 134.12, 134.00, 130.69, 130.46, 130.21, 129.44, 128.85, 127.59, 126.06, 125.64, 116.93, 71.26, 60.28, 58.60, 24.09, 21.62. HRMS (ESI) calcd. for C<sub>26</sub>H<sub>29</sub>N<sub>2</sub>O<sub>5</sub>S<sub>2</sub> [M+H<sup>+</sup>]: 513.1512, found: 513.1509.

### N-(2-benzoyl-5-fluoro-1-tosylindolin-3-yl)-2-methylpropane-2-sulfonamide(3b)

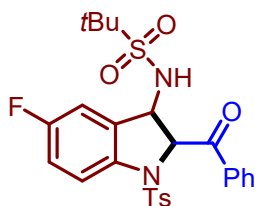

Isolated in 80% yield (84.8 mg) as white solid, mp 178.9 – 180.6 °C.

<sup>1</sup>H NMR (400 MHz, CDCl<sub>3</sub>) δ 8.19 – 8.11 (m, 2H), 7.65 (d, *J* = 8.2 Hz, 3H), 7.42 – 7.34 (m, 2H), 7.29 – 7.26 (m, 2H), 7.21 – 7.14 (m, 3H), 5.51 (d, *J* = 2.6 Hz, 1H), 4.92 (dd, *J* = 10.2, 2.2 Hz, 1H), 3.30 (d, *J* = 10.3 Hz, 1H), 2.38 (s, 3H), 1.29 (s, 9H). <sup>13</sup>C NMR (101 MHz, CDCl<sub>3</sub>) δ 193.29, 166.44 (d, *J* = 256.5 Hz), 145.29, 141.91, 133.92, 132.38 (d, *J* = 9.6 Hz), 131.08 (d, *J* = 2.9 Hz), 130.82, 130.29 (d, *J* = 2.6 Hz), 127.64, 125.95, 125.75, 117.15, 116.21, 115.99, 71.32, 60.40, 58.63, 24.16, 21.67. HRMS (ESI) calcd. for C<sub>26</sub>H<sub>28</sub>FN<sub>2</sub>O<sub>5</sub>S<sub>2</sub> [M+H<sup>+</sup>]: 531.1418, found: 531.1409.

**N-(2-benzoyl-5-chloro-1-tosylindolin-3-yl)-2-methylpropane-2-sulfonamide(3c)**

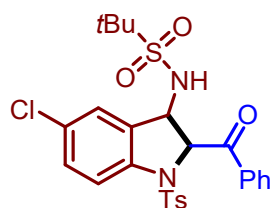

Isolated in 68% yield (74.3 mg) as white solid, mp 206.8 – 208.2 °C.

<sup>1</sup>H NMR (400 MHz, CDCl<sub>3</sub>) δ 8.09 – 8.04 (m, 2H), 7.68 – 7.57 (m, 4H), 7.51 (t, *J* = 7.7 Hz, 2H), 7.38 – 7.29 (m, 4H), 5.54 (d, *J* = 2.6 Hz, 1H), 4.86 (dd, *J* = 10.5, 2.3 Hz, 1H), 3.25 (d, *J* = 10.5 Hz, 1H), 2.40 (s, 3H), 1.27 (s, 9H). <sup>13</sup>C NMR (101 MHz, CDCl<sub>3</sub>) δ 194.33, 145.58, 140.66, 134.46, 134.35, 133.75, 132.48, 131.04, 130.95, 130.44, 129.51, 128.97, 127.65, 126.26, 118.35, 71.26, 60.46, 58.24, 24.15, 21.72. HRMS (ESI) calcd. for C<sub>26</sub>H<sub>27</sub>ClN<sub>2</sub>NaO<sub>5</sub>S<sub>2</sub> [M+Na<sup>+</sup>]: 569.0942, found: 569.0941.

**N-(2-benzoyl-5-methyl-1-tosylindolin-3-yl)-2-methylpropane-2-sulfonamide(3d)**

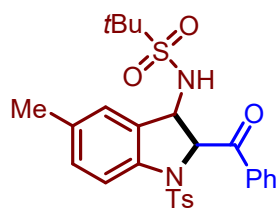

Isolated in 91% yield (95.8 mg) as white solid, mp 158.9 – 159.7 °C.

<sup>1</sup>H NMR (400 MHz, CDCl<sub>3</sub>) δ 8.00 – 7.93 (m, 2H), 7.64 – 7.54 (m, 3H), 7.44 (t, *J* = 7.8 Hz, 2H), 7.29 – 7.24 (m, 4H), 7.23 – 7.17 (m, 1H), 5.57 (s, 1H), 4.87 (d, *J* = 10.7 Hz, 1H), 3.38 (d, *J* = 10.7 Hz, 1H), 2.49 (s, 3H), 2.40 (s, 3H), 1.34 (s, 9H). <sup>13</sup>C NMR (101 MHz, CDCl<sub>3</sub>) δ 194.02, 145.48, 140.51, 134.86, 134.58, 133.76, 133.65, 133.06, 132.78, 130.18, 129.22, 128.67, 128.33, 127.60, 123.25, 71.14, 60.04, 57.35, 24.17, 21.61, 19.79. HRMS (ESI) calcd. for C<sub>27</sub>H<sub>31</sub>N<sub>2</sub>O<sub>5</sub>S<sub>2</sub> [M+H<sup>+</sup>]: 527.1669, found: 527.1669.

**N-(2-benzoyl-6-bromo-1-tosylindolin-3-yl)-2-methylpropane-2-sulfonamide(3e)**

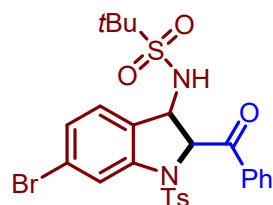

Isolated in 85% yield (100.3 mg) as white solid, mp 203.1 – 204.6 °C.

<sup>1</sup>H NMR (400 MHz, CDCl<sub>3</sub>) δ 8.09 – 8.02 (m, 2H), 7.81 (d, *J* = 1.4 Hz, 1H), 7.72 – 7.60 (m, 3H), 7.51 (t, *J* = 7.7 Hz, 2H), 7.32 (d, *J* = 8.1 Hz, 2H), 7.30 – 7.27 (m, 1H), 7.24 (d, *J* = 8.1 Hz, 1H), 5.54 (d, *J* =

2.7 Hz, 1H), 4.84 (dd,  $J = 10.3, 2.5$  Hz, 1H), 3.40 (d,  $J = 10.3$  Hz, 1H), 2.40 (s, 3H), 1.26 (s, 9H).  $^{13}\text{C}$  NMR (101 MHz,  $\text{CDCl}_3$ )  $\delta$  194.19, 145.59, 143.25, 134.37, 133.96, 130.43, 129.51, 129.46, 128.99, 128.72, 127.61, 127.32, 124.63, 119.93, 71.55, 60.42, 58.19, 24.14, 21.74. HRMS (ESI) calcd. for  $\text{C}_{26}\text{H}_{28}\text{BrN}_2\text{O}_5\text{S}_2$  [ $\text{M}+\text{H}^+$ ]: 591.0618, found: 591.0615.

**N-(2-benzoyl-7-chloro-1-tosylindolin-3-yl)-2-methylpropane-2-sulfonamide(3f)**

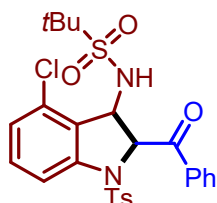

Isolated in 87% yield (95.0 mg) as white solid, mp 216.2 – 217.7 °C.

$^1\text{H}$  NMR (600 MHz,  $\text{CDCl}_3$ )  $\delta$  8.18 (d,  $J = 7.4$  Hz, 2H), 7.72 (d,  $J = 7.7$  Hz, 2H), 7.67 – 7.59 (m, 2H), 7.53 (t,  $J = 7.3$  Hz, 2H), 7.34 (t,  $J = 7.9$  Hz, 1H), 7.29 (d,  $J = 7.6$  Hz, 2H), 7.10 (d,  $J = 7.9$  Hz, 1H), 6.05 (s, 1H), 4.89 (d,  $J = 6.4$  Hz, 1H), 3.16 (d,  $J = 6.0$  Hz, 1H), 2.38 (s, 3H), 1.36 (s, 9H).  $^{13}\text{C}$  NMR (151 MHz,  $\text{CDCl}_3$ )  $\delta$  194.55, 145.14, 144.33, 134.54, 134.46, 134.31, 132.19, 131.71, 130.40, 129.82, 128.83, 127.83, 127.61, 125.72, 115.62, 70.53, 61.18, 57.80, 24.13, 21.70. HRMS (ESI) calcd. for  $\text{C}_{26}\text{H}_{28}\text{ClN}_2\text{O}_5\text{S}_2$  [ $\text{M}+\text{H}^+$ ]: 547.1123, found: 547.1120.

**N-(2-benzoyl-7-methyl-1-tosylindolin-3-yl)-2-methylpropane-2-sulfonamide(3g)**

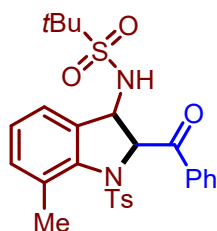

Isolated in 86% yield (90.5 mg) as white solid, mp 161.2 – 162.6 °C.

$^1\text{H}$  NMR (400 MHz,  $\text{CDCl}_3$ )  $\delta$  8.07 (d,  $J = 7.4$  Hz, 2H), 7.67 – 7.58 (m, 3H), 7.55 (d,  $J = 8.3$  Hz, 1H), 7.49 (t,  $J = 7.7$  Hz, 2H), 7.28 (d,  $J = 8.2$  Hz, 2H), 7.22 – 7.14 (m, 2H), 5.46 (d,  $J = 2.4$  Hz, 1H), 4.87 (dd,  $J = 10.4, 2.2$  Hz, 1H), 3.04 (d,  $J = 10.4$  Hz, 1H), 2.38 (s, 3H), 2.33 (s, 3H), 1.28 (s, 9H).  $^{13}\text{C}$  NMR (101 MHz,  $\text{CDCl}_3$ )  $\delta$  194.62, 145.09, 139.46, 135.90, 134.59, 133.98, 133.77, 131.48, 130.89, 130.16, 129.40, 128.76, 127.60, 126.32, 117.30, 71.44, 60.21, 58.46, 24.09, 21.57, 21.10. HRMS (ESI) calcd. for  $\text{C}_{27}\text{H}_{31}\text{N}_2\text{O}_5\text{S}_2$  [ $\text{M}+\text{H}^+$ ]: 527.1669, found: 527.1667.

**N-(2-benzoyl-5,6-dimethoxy-1-tosylindolin-3-yl)-2-methylpropane-2-sulfonamide(3h)**

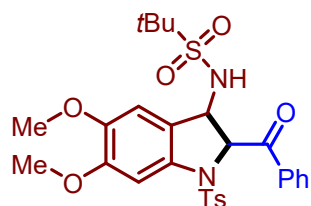

Isolated in 75% yield (85.8 mg) as white solid, mp 206.3 – 207.5 °C.

<sup>1</sup>H NMR (600 MHz, CDCl<sub>3</sub>) δ 8.05 (d, *J* = 7.4 Hz, 2H), 7.61 (d, *J* = 7.8 Hz, 3H), 7.50 (t, *J* = 7.4 Hz, 2H), 7.34 – 7.28 (m, 3H), 6.86 (s, 1H), 5.35 (s, 1H), 4.80 (d, *J* = 10.4 Hz, 1H), 3.97 (s, 3H), 3.85 (s, 3H), 2.61 (d, *J* = 10.5 Hz, 1H), 2.41 (s, 3H), 1.25 (s, 9H). <sup>13</sup>C NMR (151 MHz, CDCl<sub>3</sub>) δ 194.34, 151.37, 148.20, 145.50, 135.34, 134.57, 134.09, 133.25, 130.34, 129.41, 128.86, 127.71, 122.76, 107.83, 102.02, 71.81, 60.14, 58.67, 56.45, 56.35, 24.14, 21.69. HRMS (ESI) calcd. for C<sub>28</sub>H<sub>33</sub>N<sub>2</sub>O<sub>7</sub>S<sub>2</sub> [M+H<sup>+</sup>]: 573.1724, found: 573.1718.

**N-(2-benzoyl-1-(methylsulfonyl)indolin-3-yl)-2-methylpropane-2-sulfonamide(3i)**

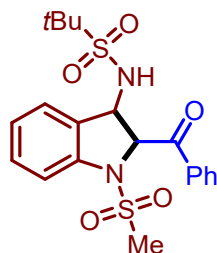

Isolated in 65% yield (56.7 mg) as white solid, mp 185.3 – 186.4 °C.

<sup>1</sup>H NMR (400 MHz, CDCl<sub>3</sub>) δ 8.08 (d, *J* = 7.4 Hz, 2H), 7.65 (t, *J* = 7.0 Hz, 1H), 7.52 (t, *J* = 7.3 Hz, 2H), 7.45 (d, *J* = 7.4 Hz, 1H), 7.40 – 7.31 (m, 2H), 7.09 (t, *J* = 7.1 Hz, 1H), 5.91 (s, 1H), 5.03 (d, *J* = 8.6 Hz, 1H), 4.90 (d, *J* = 9.4 Hz, 1H), 3.17 (s, 3H), 1.34 (s, 9H). <sup>13</sup>C NMR (101 MHz, CDCl<sub>3</sub>) δ 195.08, 142.02, 134.64, 134.19, 130.94, 129.59, 129.08, 128.49, 126.63, 123.96, 112.66, 72.64, 60.42, 58.43, 39.72, 24.27. HRMS (ESI) calcd. for C<sub>20</sub>H<sub>25</sub>N<sub>2</sub>O<sub>5</sub>S<sub>2</sub> [M+H<sup>+</sup>]: 437.1199, found: 437.1203.

**N-(2-benzoyl-1-(phenylsulfonyl)indolin-3-yl)-2-methylpropane-2-sulfonamide(3j)**

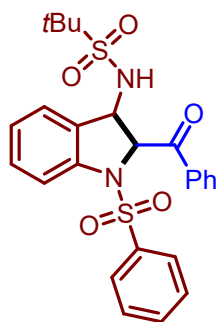

Isolated in 66% yield (65.8 mg) as white solid, mp 173.7 – 174.3 °C.

$^1\text{H}$  NMR (400 MHz,  $\text{CDCl}_3$ )  $\delta$  8.09 (d,  $J = 7.4$  Hz, 2H), 7.81 (d,  $J = 7.4$  Hz, 2H), 7.68 – 7.57 (m, 3H), 7.50 (q,  $J = 7.4$  Hz, 4H), 7.43 – 7.34 (m, 2H), 7.16 (t,  $J = 7.5$  Hz, 1H), 5.60 (d,  $J = 2.6$  Hz, 1H), 4.93 (dd,  $J = 10.2, 2.3$  Hz, 1H), 3.34 (d,  $J = 10.2$  Hz, 1H), 1.28 (s, 9H).  $^{13}\text{C}$  NMR (101 MHz,  $\text{CDCl}_3$ )  $\delta$  194.65, 141.89, 137.23, 134.63, 134.22, 133.98, 130.85, 130.34, 129.65, 129.52, 128.92, 127.61, 126.08, 125.69, 116.88, 71.38, 60.44, 58.66, 24.22. HRMS (ESI) calcd. for  $\text{C}_{25}\text{H}_{27}\text{N}_2\text{O}_5\text{S}_2$  [ $\text{M}+\text{H}^+$ ]: 499.1356, found: 499.1352.

**N-(2-benzoyl-1-((4-nitrophenyl)sulfonyl)indolin-3-yl)-2-methylpropane-2-sulfonamide(3k)**

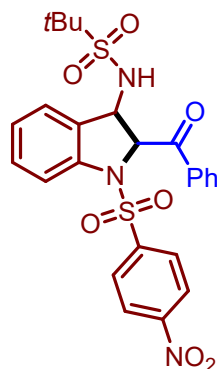

Isolated in 82% yield (89.1 mg) as yellow solid, mp 207.4 – 208.6 °C.

$^1\text{H}$  NMR (400 MHz,  $\text{CDCl}_3$ )  $\delta$  8.30 (d,  $J = 8.8$  Hz, 2H), 8.15 – 8.00 (m, 4H), 7.65 (t,  $J = 7.4$  Hz, 1H), 7.53 (t,  $J = 7.8$  Hz, 3H), 7.38 (t,  $J = 6.9$  Hz, 2H), 7.14 (t,  $J = 7.5$  Hz, 1H), 5.84 (d,  $J = 2.9$  Hz, 1H), 4.97 (dd,  $J = 9.5, 2.7$  Hz, 1H), 4.21 (d,  $J = 9.4$  Hz, 1H), 1.29 (s, 9H).  $^{13}\text{C}$  NMR (101 MHz,  $\text{CDCl}_3$ )  $\delta$  194.36, 150.66, 143.56, 141.34, 134.59, 134.37, 131.03, 129.53, 129.30, 129.08, 128.91, 126.35, 125.38, 124.65, 114.89, 71.69, 60.61, 58.89, 24.21. HRMS (ESI) calcd. for  $\text{C}_{25}\text{H}_{26}\text{N}_3\text{O}_7\text{S}_2$  [ $\text{M}+\text{H}^+$ ]: 544.1207, found: 544.1193.

**N-((2S,3R)-2-benzoyl-1-tosylindolin-3-yl)-4-methylbenzenesulfonamide(3l)**

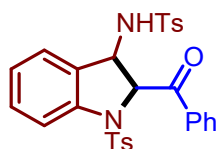

Isolated in 57% yield (62.3 mg) as white solid, mp 157.1 – 158.3 °C.

<sup>1</sup>H NMR (400 MHz, CDCl<sub>3</sub>) δ 7.98 (d, *J* = 7.6 Hz, 2H), 7.62 (d, *J* = 7.5 Hz, 4H), 7.57 – 7.42 (m, 4H), 7.37 – 7.27 (m, 3H), 7.20 (d, *J* = 8.0 Hz, 2H), 7.01 (t, *J* = 7.5 Hz, 1H), 6.76 (d, *J* = 7.5 Hz, 1H), 5.52 (d, *J* = 1.2 Hz, 1H), 4.64 (d, *J* = 8.7 Hz, 1H), 3.74 (d, *J* = 8.8 Hz, 1H), 2.42 (s, 3H), 2.40 (s, 3H). <sup>13</sup>C NMR (101 MHz, CDCl<sub>3</sub>) δ 193.96, 145.47, 144.34, 142.11, 136.71, 134.28, 134.17, 134.12, 130.81, 130.19, 130.10, 129.87, 129.47, 128.83, 127.64, 127.25, 125.62, 117.36, 70.39, 57.07, 21.76, 21.70. HRMS (ESI) calcd. for C<sub>29</sub>H<sub>27</sub>N<sub>2</sub>O<sub>5</sub>S<sub>2</sub> [M+H<sup>+</sup>]: 547.1356, found: 547.1355.

**N-(2-(2-methoxybenzoyl)-1-tosylindolin-3-yl)-2-methylpropane-2-sulfonamide(4a)**

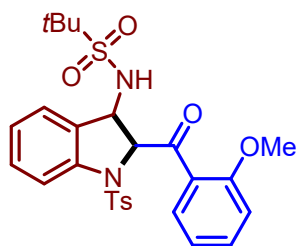

Isolated in 83% yield (90.0 mg) as white solid, mp 198.1 – 198.9 °C.

<sup>1</sup>H NMR (400 MHz, CDCl<sub>3</sub>) δ 7.65 (d, *J* = 8.1 Hz, 1H), 7.59 – 7.52 (m, 3H), 7.52 – 7.46 (m, 1H), 7.43 (d, *J* = 7.6 Hz, 1H), 7.39 – 7.34 (m, 1H), 7.25 (d, *J* = 8.3 Hz, 2H), 7.16 (td, *J* = 7.5, 0.7 Hz, 1H), 7.05 – 6.99 (m, 1H), 6.94 (d, *J* = 8.3 Hz, 1H), 5.55 (d, *J* = 2.7 Hz, 1H), 4.99 (dd, *J* = 10.4, 2.6 Hz, 1H), 3.72 (s, 3H), 2.97 (d, *J* = 10.5 Hz, 1H), 2.38 (s, 3H), 1.27 (s, 9H). <sup>13</sup>C NMR (101 MHz, CDCl<sub>3</sub>) δ 197.57, 158.29, 145.21, 141.92, 134.09, 133.80, 131.67, 131.19, 130.40, 130.11, 127.53, 126.31, 126.05, 125.84, 121.08, 117.34, 111.30, 74.49, 60.11, 57.74, 55.44, 24.10, 21.65. HRMS (ESI) calcd. for C<sub>27</sub>H<sub>31</sub>N<sub>2</sub>O<sub>6</sub>S<sub>2</sub> [M+H<sup>+</sup>]: 543.1618, found: 543.1617.

**N-(2-(3-methoxybenzoyl)-1-tosylindolin-3-yl)-2-methylpropane-2-sulfonamide(4b)**

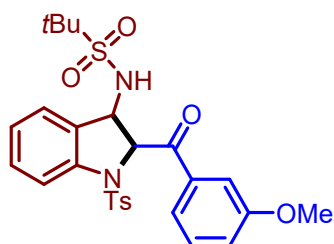

Isolated in 89% yield (96.5 mg) as white solid, mp 183.4 – 184.7 °C.



$^1\text{H}$  NMR (400 MHz,  $\text{CDCl}_3$ )  $\delta$  7.71 – 7.63 (m, 4H), 7.59 – 7.54 (m, 1H), 7.46 – 7.33 (m, 3H), 7.27 (d,  $J$  = 8.2 Hz, 2H), 7.19 – 7.13 (m, 2H), 5.49 (d,  $J$  = 2.7 Hz, 1H), 4.92 (dd,  $J$  = 10.3, 2.5 Hz, 1H), 3.84 (s, 3H), 3.27 (d,  $J$  = 10.3 Hz, 1H), 2.38 (s, 3H), 1.28 (s, 9H).  $^{13}\text{C}$  NMR (101 MHz,  $\text{CDCl}_3$ )  $\delta$  194.32, 159.86, 145.16, 141.81, 135.77, 133.95, 130.67, 130.54, 130.16, 129.78, 127.55, 126.03, 125.68, 122.05, 121.03, 117.05, 113.19, 71.49, 60.25, 58.51, 55.48, 24.08, 21.59. HRMS (ESI) calcd. for  $\text{C}_{27}\text{H}_{31}\text{N}_2\text{O}_6\text{S}_2$  [ $\text{M}+\text{H}^+$ ]: 543.1618, found: 543.1615.

**N-(2-(3-chlorobenzoyl)-1-tosylindolin-3-yl)-2-methylpropane-2-sulfonamide(4c)**

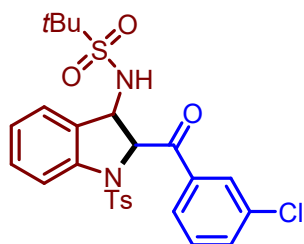

Isolated in 70% yield (76.5 mg) as white solid, mp 181.6 – 182.5 °C.

$^1\text{H}$  NMR (400 MHz,  $\text{CDCl}_3$ )  $\delta$  8.06 – 7.95 (m, 2H), 7.69 – 7.61 (m, 3H), 7.61 – 7.55 (m, 1H), 7.50 – 7.43 (m, 1H), 7.43 – 7.33 (m, 2H), 7.28 (d,  $J$  = 8.2 Hz, 2H), 7.17 (t,  $J$  = 7.5 Hz, 1H), 5.47 (d,  $J$  = 2.7 Hz, 1H), 4.93 (dd,  $J$  = 10.2, 2.4 Hz, 1H), 3.33 (d,  $J$  = 10.3 Hz, 1H), 2.38 (s, 3H), 1.30 (s, 9H).  $^{13}\text{C}$  NMR (101 MHz,  $\text{CDCl}_3$ )  $\delta$  193.64, 145.28, 141.67, 136.18, 135.11, 133.93, 133.78, 130.77, 130.21, 130.13, 130.11, 129.24, 127.62, 127.58, 125.94, 125.73, 117.03, 71.42, 60.34, 58.44, 24.09, 21.60. HRMS (ESI) calcd. for  $\text{C}_{26}\text{H}_{28}\text{ClN}_2\text{O}_5\text{S}_2$  [ $\text{M}+\text{H}^+$ ]: 547.1123, found: 547.1106.

**N-(2-(3-bromobenzoyl)-1-tosylindolin-3-yl)-2-methylpropane-2-sulfonamide(4d)**

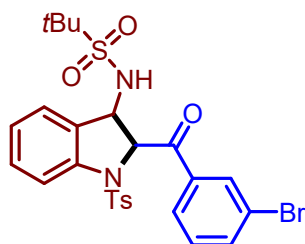

Isolated in 83% yield (97.9 mg) as white solid, mp 174.4 – 175.5 °C.

$^1\text{H}$  NMR (400 MHz,  $\text{CDCl}_3$ )  $\delta$  8.16 (t,  $J$  = 1.8 Hz, 1H), 8.05 (d,  $J$  = 7.9 Hz, 1H), 7.77 – 7.72 (m, 1H), 7.65 (d,  $J$  = 8.3 Hz, 3H), 7.43 – 7.34 (m, 3H), 7.28 (d,  $J$  = 8.1 Hz, 2H), 7.17 (td,  $J$  = 7.6, 0.7 Hz, 1H), 5.46 (d,  $J$  = 2.7 Hz, 1H), 4.93 (dd,  $J$  = 10.3, 2.5 Hz, 1H), 3.26 (d,  $J$  = 10.3 Hz, 1H), 2.39 (s, 3H), 1.30 (s, 9H).  $^{13}\text{C}$  NMR (101 MHz,  $\text{CDCl}_3$ )  $\delta$  193.63, 145.37, 141.78, 136.92, 136.47, 133.91, 132.26, 130.88,

130.42, 130.31, 130.27, 128.15, 127.68, 126.03, 125.84, 123.21, 117.19, 71.52, 60.44, 58.52, 24.20, 21.70. HRMS (ESI) calcd. for  $C_{26}H_{28}BrN_2O_5S_2$   $[M+H^+]$ : 591.0618, found: 591.0602.

**N-(2-(4-methoxybenzoyl)-1-tosylindolin-3-yl)-2-methylpropane-2-sulfonamide(4e)**

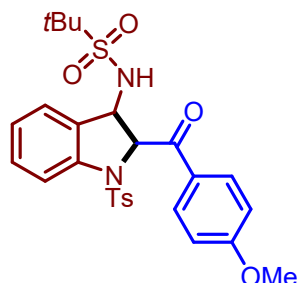

Isolated in 89% yield (96.5 mg) as white solid, mp 242.5 – 243.7 °C.

$^1H$  NMR (400 MHz, DMSO)  $\delta$  8.06 (t,  $J$  = 8.9 Hz, 3H), 7.79 (d,  $J$  = 8.3 Hz, 2H), 7.46 (d,  $J$  = 8.1 Hz, 3H), 7.42 (d,  $J$  = 7.6 Hz, 1H), 7.36 (t,  $J$  = 7.7 Hz, 1H), 7.17 –

7.11 (m, 2H), 5.51 (d,  $J$  = 7.5 Hz, 1H), 4.87 (t,  $J$  = 8.2 Hz, 1H), 3.90 (s, 3H), 2.39 (s, 3H), 1.08 (s, 9H).

$^{13}C$  NMR (101 MHz, DMSO)  $\delta$  194.83, 164.43, 145.36, 141.09, 133.45, 131.73, 130.57, 130.37, 130.06, 128.53, 128.27, 126.14, 124.44, 114.81, 113.62, 68.99, 60.09, 59.25, 56.20, 23.90, 21.55.

HRMS (ESI) calcd. for  $C_{27}H_{31}N_2O_6S_2$   $[M+H^+]$ : 543.1618, found: 543.1627.

**2-methyl-N-(2-(4-methylbenzoyl)-1-tosylindolin-3-yl)propane-2-sulfonamide(4f)**

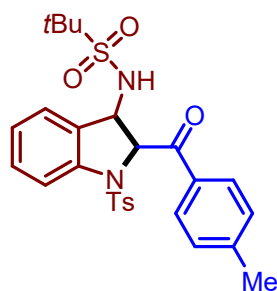

Isolated in 79% yield (83.1 mg) as white solid, mp 224.1 – 225.4 °C.

$^1H$  NMR (400 MHz, DMSO)  $\delta$  8.06 (d,  $J$  = 9.1 Hz, 1H), 7.99 (d,  $J$  = 8.0 Hz, 2H), 7.78 (d,  $J$  = 8.1 Hz, 2H), 7.47 – 7.35 (m, 6H), 7.14 (t,  $J$  = 7.4 Hz, 1H), 5.52 (d,  $J$  = 7.4 Hz, 1H), 4.89 (t,  $J$  = 8.1 Hz, 1H),

2.43 (s, 3H), 2.38 (s, 3H), 1.08 (s, 9H).  $^{13}C$  NMR (101 MHz, DMSO)  $\delta$  196.02, 145.38, 145.30, 141.06, 133.38, 133.16, 130.58, 130.41, 130.07, 129.95, 129.38, 128.28, 126.15, 124.47, 113.62, 69.25, 60.01,

59.26, 23.92, 21.75, 21.54. HRMS (ESI) calcd. for  $C_{27}H_{31}N_2O_5S_2$   $[M+H^+]$ : 527.1669, found: 527.1705.

**N-(2-(4-fluorobenzoyl)-1-tosylindolin-3-yl)-2-methylpropane-2-sulfonamide(4g)**

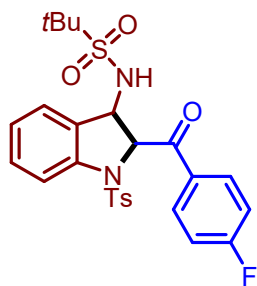

Isolated in 77% yield (81.6 mg) as white solid, mp 181.3 – 182.7 °C.

$^1\text{H}$  NMR (400 MHz, DMSO)  $\delta$  8.22 – 8.14 (m, 2H), 8.08 (d,  $J$  = 9.1 Hz, 1H), 7.81 (d,  $J$  = 8.3 Hz, 2H), 7.52 – 7.44 (m, 4H), 7.43 – 7.35 (m, 2H), 7.15 (t,  $J$  = 7.3 Hz, 1H), 5.53 (d,  $J$  = 7.4 Hz, 1H), 4.92 (t,  $J$  = 8.2 Hz, 1H), 2.39 (s, 3H), 1.11 (s, 9H).  $^{13}\text{C}$  NMR (101 MHz, DMSO)  $\delta$  195.28 , 167.31 , 164.79 , 145.47 , 140.96 , 133.28 , 132.77 – 132.07 (m), 130.62 , 130.46 , 129.69 , 128.32 , 126.10 , 124.54 , 116.69 (d,  $J$  = 22.0 Hz), 113.63 , 69.65 , 60.00 , 59.31 , 23.93 , 21.55. HRMS (ESI) calcd. for  $\text{C}_{26}\text{H}_{28}\text{FN}_2\text{O}_5\text{S}_2$  [ $\text{M}+\text{H}^+$ ]: 531.1418, found: 531.1415.

**N-(2-(4-chlorobenzoyl)-1-tosylindolin-3-yl)-2-methylpropane-2-sulfonamide(4h)**

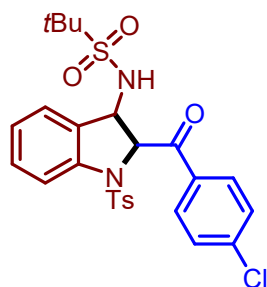

Isolated in 80% yield (87.4 mg) as white solid, mp 224.9 – 226.1 °C.

$^1\text{H}$  NMR (400 MHz,  $\text{CDCl}_3$ )  $\delta$  8.09 (t,  $J$  = 7.5 Hz, 3H), 7.80 (d,  $J$  = 8.2 Hz, 2H), 7.72 (d,  $J$  = 8.5 Hz, 2H), 7.50 – 7.45 (m, 2H), 7.44 – 7.35 (m, 2H), 7.15 (t,  $J$  = 7.4 Hz, 1H), 5.49 (d,  $J$  = 7.4 Hz, 1H), 4.93 (t,  $J$  = 8.2 Hz, 1H), 2.39 (s, 3H), 1.13 (s, 9H).  $^{13}\text{C}$  NMR (101 MHz,  $\text{CDCl}_3$ )  $\delta$  200.49, 150.25, 145.67, 144.40, 139.13, 137.93, 135.84, 135.38, 135.24, 134.44, 134.31, 133.07, 130.81, 129.33, 118.40, 74.58, 64.77, 64.10, 28.72, 26.30. HRMS (ESI) calcd. for  $\text{C}_{26}\text{H}_{27}\text{ClN}_2\text{NaO}_5\text{S}_2$  [ $\text{M}+\text{Na}^+$ ]: 569.0942, found: 569.0939.

**2-methyl-N-(1-tosyl-2-(4-(trifluoromethyl)benzoyl)indolin-3-yl)propane-2-sulfonamide(4i)**

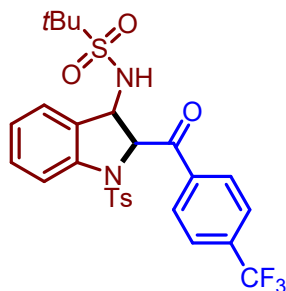

Isolated in 57% yield (66.1 mg) as white solid, mp 195.8 – 197.3 °C.

$^1\text{H}$  NMR (600 MHz,  $\text{CDCl}_3$ )  $\delta$  8.20 (d,  $J = 7.9$  Hz, 2H), 7.77 (d,  $J = 8.0$  Hz, 2H), 7.65 (t,  $J = 9.0$  Hz, 3H), 7.41 (t,  $J = 7.7$  Hz, 1H), 7.36 (d,  $J = 7.4$  Hz, 1H), 7.28 (d,  $J = 7.9$  Hz, 2H), 7.18 (t,  $J = 7.4$  Hz, 1H), 5.51 (d,  $J = 2.0$  Hz, 1H), 4.96 (d,  $J = 10.1$  Hz, 1H), 3.29 (d,  $J = 10.2$  Hz, 1H), 2.38 (s, 3H), 1.31 (s, 9H).

$^{13}\text{C}$  NMR (151 MHz,  $\text{CDCl}_3$ )  $\delta$  194.44, 145.43, 141.78, 137.66, 135.17, 134.95, 133.76, 130.94, 130.33, 130.14, 129.83, 127.69, 126.01 – 125.80 (m), 124.57, 122.76, 117.31, 71.74, 60.49, 58.59, 24.19, 21.68.

HRMS (ESI) calcd. for  $\text{C}_{27}\text{H}_{28}\text{F}_3\text{N}_2\text{O}_5\text{S}_2$  [ $\text{M}+\text{H}^+$ ]: 581.1386, found: 581.1381.

#### N-(2-(3,4-dichlorobenzoyl)-1-tosylindolin-3-yl)-2-methylpropane-2-sulfonamide(4j)

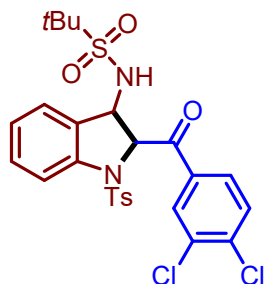

Isolated in 75% yield (87.0 mg) as white solid, mp 175.4 – 176.3 °C.

$^1\text{H}$  NMR (400 MHz,  $\text{CDCl}_3$ )  $\delta$  8.17 (d,  $J = 2.0$  Hz, 1H), 7.99 (dd,  $J = 8.4, 2.1$  Hz, 1H), 7.69 – 7.60 (m, 4H), 7.45 – 7.35 (m, 2H), 7.31 (d,  $J = 8.2$  Hz, 2H), 7.20 (t,  $J = 7.5$  Hz, 1H), 5.46 (d,  $J = 2.7$  Hz, 1H), 4.95 (dd,  $J = 10.3, 2.5$  Hz, 1H), 3.29 (d,  $J = 10.3$  Hz, 1H), 2.41 (s, 3H), 1.34 (s, 9H).  $^{13}\text{C}$  NMR (151

MHz,  $\text{CDCl}_3$ )  $\delta$  193.03, 145.43, 141.76, 138.78, 134.38, 133.80, 133.63, 131.33, 130.95, 130.33, 130.06, 128.62, 127.69, 125.92, 125.88, 117.26, 71.51, 60.51, 58.58, 24.22, 21.70. HRMS (ESI) calcd.

for  $\text{C}_{26}\text{H}_{26}\text{Cl}_2\text{N}_2\text{NaO}_5\text{S}_2$  [ $\text{M}+\text{Na}^+$ ]: 603.0552, found: 603.0551.

#### 2-methyl-N-(2-(thiophene-2-carbonyl)-1-tosylindolin-3-yl)propane-2-sulfonamide(4k)

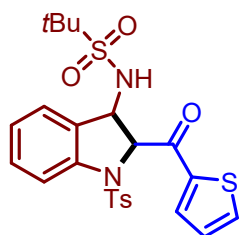

Isolated in 83% yield (86.0 mg) as yellow solid, mp 185.3 – 186.7 °C.

<sup>1</sup>H NMR (400 MHz, CDCl<sub>3</sub>) δ 8.13 (dd, *J* = 3.9, 0.6 Hz, 1H), 7.76 – 7.70 (m, 2H), 7.66 – 7.61 (m, 2H), 7.41 (t, *J* = 8.1 Hz, 2H), 7.27 (d, *J* = 8.4 Hz, 2H), 7.21 – 7.14 (m, 2H), 5.16 (d, *J* = 2.7 Hz, 1H), 4.98 (dd, *J* = 10.4, 2.7 Hz, 1H), 3.13 – 3.00 (m, 1H), 2.39 (s, 3H), 1.32 (s, 9H). <sup>13</sup>C NMR (101 MHz, CDCl<sub>3</sub>) δ 187.59, 145.43, 141.54, 140.52, 136.17, 135.20, 133.40, 130.77, 130.70, 130.19, 128.56, 127.59, 126.12, 126.01, 117.26, 73.11, 60.28, 59.13, 24.12, 21.59. HRMS (ESI) calcd. for C<sub>24</sub>H<sub>27</sub>N<sub>2</sub>O<sub>5</sub>S<sub>3</sub> [M+H<sup>+</sup>]: 519.1077, found: 519.1073.

**N-((2S,3R)-2-(cyclopropanecarbonyl)-1-tosylindolin-3-yl)-2-methylpropane-2-sulfonamide(4l)**

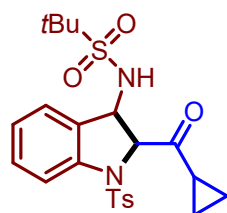

Isolated in 58% yield (55.2 mg) as white solid, mp 178.4 – 179.9 °C.

<sup>1</sup>H NMR (400 MHz, CDCl<sub>3</sub>) δ 7.78 (d, *J* = 8.4 Hz, 1H), 7.55 (d, *J* = 8.2 Hz, 2H), 7.42 (t, *J* = 7.0 Hz, 2H), 7.26 (d, *J* = 8.4 Hz, 2H), 7.21 (t, *J* = 7.4 Hz, 1H), 5.04 (d, *J* = 10.0 Hz, 1H), 4.59 (d, *J* = 1.7 Hz, 1H), 2.79 – 2.69 (m, 1H), 2.41 (s, 1H), 2.38 (s, 3H), 1.32 (s, 9H), 1.17 – 1.04 (m, 2H), 1.03 – 0.95 (m, 2H). <sup>13</sup>C NMR (151 MHz, CDCl<sub>3</sub>) δ 205.28, 145.72, 140.90, 133.07, 131.57, 130.67, 130.30, 127.47, 126.65, 126.50, 118.32, 76.10, 60.16, 56.89, 24.23, 21.64, 17.57, 13.28, 13.10. HRMS (ESI) calcd. for C<sub>23</sub>H<sub>29</sub>N<sub>2</sub>O<sub>5</sub>S<sub>2</sub> [M+H<sup>+</sup>]: 477.1512, found: 477.1510.

**tert-butyl 3-((1,1-dimethylethyl)sulfonamido)-1-tosylindoline-2-carboxylate(4m)**

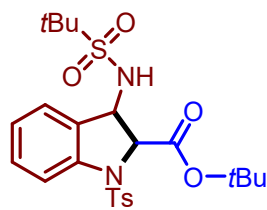

Isolated in 27% yield (27.4 mg) as white solid, mp 190.2 – 191.3 °C.

$^1\text{H}$  NMR (400 MHz,  $\text{CDCl}_3$ )  $\delta$  7.70 – 7.58 (m, 3H), 7.43 – 7.34 (m, 2H), 7.26 (d,  $J$  = 7.2 Hz, 2H), 7.20 – 7.11 (m, 1H), 4.87 (dd,  $J$  = 10.3, 2.1 Hz, 1H), 4.46 (d,  $J$  = 2.4 Hz, 1H), 2.94 (d,  $J$  = 10.3 Hz, 1H), 2.38 (s, 3H), 1.46 (s, 9H), 1.37 (s, 9H).  $^{13}\text{C}$  NMR (101 MHz,  $\text{CDCl}_3$ )  $\delta$  167.52, 145.14, 141.22, 134.18, 130.64, 130.55, 130.06, 127.25, 126.17, 125.71, 116.83, 83.43, 70.52, 60.06, 58.80, 27.87, 24.21, 21.54. HRMS (ESI) calcd. for  $\text{C}_{24}\text{H}_{33}\text{N}_2\text{O}_6\text{S}_2$  [ $\text{M}+\text{H}^+$ ]: 509.1775, found: 509.1766.

**2-methyl-N-((2R,3R)-2-phenyl-1-tosylindolin-3-yl)propane-2-sulfonamide(4n)**

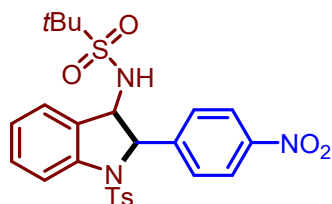

Isolated in 77% yield (81.5 mg) as white solid, mp 228.2 – 229.6 °C.

$^1\text{H}$  NMR (400 MHz,  $\text{CDCl}_3$ )  $\delta$  8.15 (d,  $J$  = 8.8 Hz, 2H), 7.90 (d,  $J$  = 8.2 Hz, 1H), 7.65 (t,  $J$  = 8.6 Hz, 4H), 7.53 - 7.45 (m, 1H), 7.29 (d,  $J$  = 8.1 Hz, 2H), 7.28-7.26 (m, 1H), 7.20 (t,  $J$  = 7.4 Hz, 1H), 5.39 (s, 1H), 4.56 (d,  $J$  = 10.0 Hz, 1H), 2.83 (d,  $J$  = 10.0 Hz, 1H), 2.38 (s, 3H), 1.34 (s, 9H).  $^{13}\text{C}$  NMR (101 MHz,  $\text{CDCl}_3$ )  $\delta$  147.73, 146.36, 145.24, 142.01, 134.14, 131.41, 130.42, 128.96, 127.40, 127.28, 126.44, 126.23, 124.11, 117.62, 72.98, 63.36, 60.44, 24.17, 21.65. HRMS (ESI) calcd. for  $\text{C}_{25}\text{H}_{27}\text{N}_3\text{NaO}_6\text{S}_2$  [ $\text{M}+\text{Na}^+$ ]: 552.1233, found: 552.1232.

**phenyl(1-tosyl-1H-indol-2-yl)methanone(5a)**

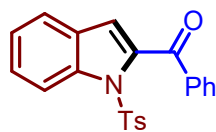

Isolated in 78% yield (58.5 mg) as white solid, mp 171.4 – 172.8 °C.

$^1\text{H}$  NMR (600 MHz,  $\text{CDCl}_3$ )  $\delta$  8.14 (d,  $J$  = 8.5 Hz, 1H), 7.98 (d,  $J$  = 7.4 Hz, 2H), 7.94 (d,  $J$  = 8.3 Hz, 2H), 7.62 (t,  $J$  = 7.4 Hz, 1H), 7.57 (d,  $J$  = 7.8 Hz, 1H), 7.50 (t,  $J$  = 7.7 Hz, 2H), 7.46 (t,  $J$  = 7.5 Hz, 1H), 7.32 – 7.26 (m, 3H), 6.93 (s, 1H), 2.37 (s, 3H).  $^{13}\text{C}$  NMR (151 MHz,  $\text{CDCl}_3$ )  $\delta$  187.78, 145.22, 138.05, 137.79, 137.63, 135.32, 133.66, 130.17, 129.76, 128.77, 128.64, 127.72, 127.06, 124.32, 122.65, 116.74, 115.27, 21.80. HRMS (ESI) calcd. for  $\text{C}_{22}\text{H}_{18}\text{NO}_3\text{S}$  [ $\text{M}+\text{H}^+$ ]: 376.1002, found: 376.0999.

**(4-chloro-1-tosyl-1H-indol-2-yl)(phenyl)methanone(5b)**

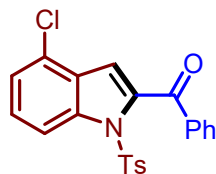

Isolated in 83% yield (67.9 mg) as white solid, mp 131.4 – 132.8 °C.

<sup>1</sup>H NMR (600 MHz, CDCl<sub>3</sub>) δ 8.04 (d, *J* = 8.4 Hz, 1H), 7.98 (dd, *J* = 14.9, 7.8 Hz, 4H), 7.64 (t, *J* = 7.4 Hz, 1H), 7.51 (t, *J* = 7.7 Hz, 2H), 7.37 (t, *J* = 8.1 Hz, 1H), 7.29 (t, *J* = 6.9 Hz, 3H), 7.01 (s, 1H), 2.38 (s, 3H). <sup>13</sup>C NMR (151 MHz, CDCl<sub>3</sub>) δ 187.47, 145.60, 138.19, 138.07, 137.23, 135.08, 133.93, 130.22, 129.89, 128.73, 127.80, 127.74, 127.65, 127.54, 123.98, 113.74, 113.61, 21.81. HRMS (ESI) calcd. for C<sub>22</sub>H<sub>17</sub>ClNO<sub>3</sub>S [M+H<sup>+</sup>]: 410.0612, found: 410.0609.

**(6-bromo-1-tosyl-1H-indol-2-yl)(phenyl)methanone(5c)**

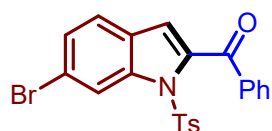

Isolated in 63% yield (57.1 mg) as white solid, mp 147.5 – 148.3 °C.

<sup>1</sup>H NMR (600 MHz, CDCl<sub>3</sub>) δ 8.33 (s, 1H), 7.96 (d, *J* = 8.0 Hz, 4H), 7.63 (t, *J* = 7.3 Hz, 1H), 7.50 (t, *J* = 7.7 Hz, 2H), 7.45 – 7.40 (m, 2H), 7.32 (d, *J* = 8.1 Hz, 2H), 6.87 (s, 1H), 2.40 (s, 3H). <sup>13</sup>C NMR (151 MHz, CDCl<sub>3</sub>) δ 187.38, 145.59, 138.33, 138.30, 137.35, 135.17, 133.85, 130.17, 129.92, 128.70, 127.78, 127.47, 123.66, 120.86, 118.26, 115.97, 21.84. HRMS (ESI) calcd. for C<sub>22</sub>H<sub>17</sub>BrNO<sub>3</sub>S [M+H<sup>+</sup>]: 454.0107, found: 454.0102.

**(7-methyl-1-tosyl-1H-indol-2-yl)(phenyl)methanone(5d)**

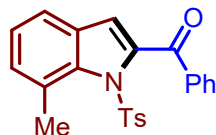

Isolated in 66% yield (51.4 mg) as white solid, mp 134.2 – 135.4 °C.

<sup>1</sup>H NMR (400 MHz, CDCl<sub>3</sub>) δ 8.01 (d, *J* = 8.6 Hz, 1H), 7.96 (d, *J* = 7.7 Hz, 2H), 7.90 (d, *J* = 8.1 Hz, 2H), 7.60 (t, *J* = 7.3 Hz, 1H), 7.47 (t, *J* = 7.6 Hz, 2H), 7.33 (s, 1H), 7.25 (t, *J* = 8.8 Hz, 3H), 6.86 (s, 1H), 2.41 (s, 3H), 2.35 (s, 3H). <sup>13</sup>C NMR (101 MHz, CDCl<sub>3</sub>) δ 187.78, 145.09, 138.16, 137.71, 136.07, 135.23, 134.09, 133.55, 130.10, 129.69, 129.05, 128.61, 128.59, 127.61, 122.36, 116.87, 114.95, 21.74, 21.33. HRMS (ESI) calcd. for C<sub>23</sub>H<sub>20</sub>NO<sub>3</sub>S [M+H<sup>+</sup>]: 390.1158, found: 390.1156.

**(4-chlorophenyl)(1-tosyl-1H-indol-2-yl)methanone(5e)**

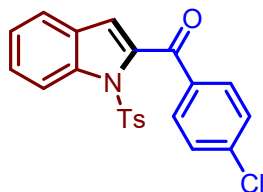

Isolated in 76% yield (62.2 mg) as white solid, mp 216.5 – 217.7 °C.

<sup>1</sup>H NMR (600 MHz, DMSO) δ 8.04 (d, *J* = 7.9 Hz, 1H), 7.91 (d, *J* = 7.5 Hz, 2H), 7.82 (d, *J* = 7.3 Hz, 2H), 7.73 – 7.61 (m, 3H), 7.56 – 7.48 (m, 1H), 7.44 – 7.27 (m, 4H), 2.31 (s, 3H). <sup>13</sup>C NMR (151 MHz, DMSO) δ 186.29, 146.16, 139.32, 137.28, 137.25, 136.09, 134.13, 131.78, 130.47, 129.52, 129.06, 127.77, 127.50, 125.11, 123.53, 117.80, 115.25, 21.52. HRMS (ESI) calcd. for C<sub>22</sub>H<sub>16</sub>ClNNO<sub>3</sub>S [M+Na<sup>+</sup>]: 432.0432, found: 432.0429.

**(1-tosyl-1H-indol-2-yl)(4-(trifluoromethyl)phenyl)methanone(5f)**

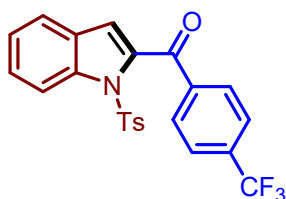

Isolated in 52% yield (46.1 mg) as white solid, mp 171.9 – 172.3 °C.

<sup>1</sup>H NMR (600 MHz, CDCl<sub>3</sub>) δ 8.14 (d, *J* = 8.5 Hz, 1H), 8.07 (d, *J* = 8.1 Hz, 2H), 7.88 (d, *J* = 8.4 Hz, 2H), 7.75 (d, *J* = 8.2 Hz, 2H), 7.58 (d, *J* = 7.8 Hz, 1H), 7.52 – 7.46 (m, 1H), 7.32 (t, *J* = 7.5 Hz, 1H), 7.26 (d, *J* = 8.3 Hz, 2H), 6.99 (s, 1H), 2.37 (s, 3H). <sup>13</sup>C NMR (151 MHz, CDCl<sub>3</sub>) δ 186.67, 145.45, 140.56, 137.75 (d, *J* = 65.4 Hz), 135.00, 134.86, 134.79, 134.57, 134.35, 130.26, 129.81, 128.75, 127.58 (d, *J* = 10.3 Hz), 126.08 – 125.49 (m), 124.63, 122.85 (d, *J* = 5.1 Hz), 117.70, 115.40, 21.78. HRMS (ESI) calcd. for C<sub>23</sub>H<sub>17</sub>F<sub>3</sub>NO<sub>3</sub>S [M+H<sup>+</sup>]: 444.0876, found: 444.0874.

**(3-methoxyphenyl)(1-tosyl-1H-indol-2-yl)methanone(5g)**

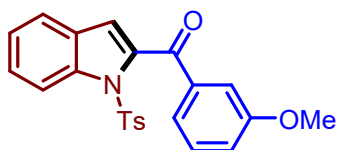

Isolated in 69% yield (55.9 mg) as white solid, mp 138.2 – 139.4 °C.

<sup>1</sup>H NMR (600 MHz, CDCl<sub>3</sub>) δ 8.13 (d, *J* = 8.5 Hz, 1H), 7.95 (d, *J* = 8.3 Hz, 2H), 7.60 – 7.50 (m, 3H),



7.46 (t,  $J = 7.8$  Hz, 1H), 7.39 (t,  $J = 7.9$  Hz, 1H), 7.32 – 7.25 (m, 3H), 7.17 (dd,  $J = 8.2, 2.5$  Hz, 1H), 6.94 (s, 1H), 3.86 (s, 3H), 2.37 (s, 3H).  $^{13}\text{C}$  NMR (151 MHz,  $\text{CDCl}_3$ )  $\delta$  187.46, 159.82, 145.22, 138.84, 137.94, 137.79, 135.34, 129.74, 129.61, 128.67, 127.69, 127.07, 124.30, 123.37, 122.67, 120.49, 116.80, 115.22, 113.71, 55.61, 21.77. HRMS (ESI) calcd. for  $\text{C}_{23}\text{H}_{20}\text{NO}_4\text{S}$  [ $\text{M}+\text{H}^+$ ]: 406.1108, found: 406.1107.

**thiophen-2-yl(1-tosyl-1H-indol-2-yl)methanone(5h)**

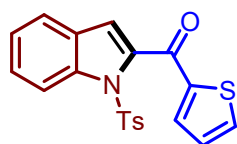

Isolated in 72% yield (54.9 mg) as yellow solid, mp 162.4 – 164.1 °C.

$^1\text{H}$  NMR (600 MHz,  $\text{CDCl}_3$ )  $\delta$  8.13 (d,  $J = 8.5$  Hz, 1H), 8.00 (d,  $J = 8.4$  Hz, 2H), 7.81 – 7.73 (m, 2H), 7.57 (d,  $J = 7.8$  Hz, 1H), 7.49 – 7.42 (m, 1H), 7.34 – 7.23 (m, 3H), 7.19 – 7.14 (m, 1H), 7.05 (s, 1H), 2.36 (s, 3H).  $^{13}\text{C}$  NMR (151 MHz,  $\text{CDCl}_3$ )  $\delta$  179.25, 145.25, 144.23, 137.82, 137.32, 135.51, 135.28, 129.72, 128.47, 128.39, 127.80, 127.11, 124.27, 122.68, 116.53, 115.22, 21.75. HRMS (ESI) calcd. for  $\text{C}_{20}\text{H}_{17}\text{NO}_3\text{S}_2$  [ $\text{M}+\text{H}^+$ ]: 382.0566, found: 382.0566.

**phenyl(1-(phenylsulfonyl)-1H-indol-2-yl)methanone(5i)**

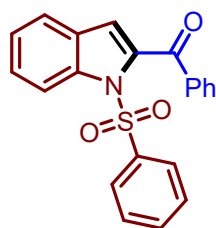

Isolated in 56% yield (40.4 mg) as white solid, mp 138.8 – 140.8 °C.

$^1\text{H}$  NMR (600 MHz,  $\text{CDCl}_3$ )  $\delta$  8.15 (d,  $J = 8.5$  Hz, 1H), 8.08 (d,  $J = 7.7$  Hz, 2H), 7.99 (d,  $J = 7.5$  Hz, 2H), 7.63 (t,  $J = 7.3$  Hz, 1H), 7.60 – 7.55 (m, 2H), 7.54 – 7.45 (m, 5H), 7.31 (t,  $J = 7.5$  Hz, 1H), 6.95 (s, 1H).  $^{13}\text{C}$  NMR (151 MHz,  $\text{CDCl}_3$ )  $\delta$  187.62, 138.29, 138.01, 137.83, 137.53, 134.08, 133.70, 130.16, 129.13, 128.71, 128.65, 127.63, 127.18, 124.41, 122.72, 117.03, 115.23. HRMS (ESI) calcd. for  $\text{C}_{21}\text{H}_{16}\text{NO}_3\text{S}$  [ $\text{M}+\text{H}^+$ ]: 362.0845, found: 362.0846.

**2-benzyl-1-tosylindolin-3-amine (7)**

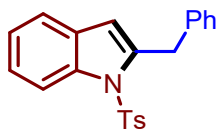

Isolated in 52% yield (37.5 mg) as yellow solid, mp 163.1 – 164.3 °C.

$^1\text{H}$  NMR (600 MHz,  $\text{CDCl}_3$ )  $\delta$  7.98 (d,  $J = 8.3$  Hz, 1H), 7.73 (d,  $J = 8.2$  Hz, 2H), 7.37 (d,  $J = 7.4$  Hz, 1H), 7.31 – 7.26 (m, 4H), 7.24 – 7.16 (m, 6H), 4.00 (s, 2H), 2.34 (s, 3H).  $^{13}\text{C}$  NMR (151 MHz,  $\text{CDCl}_3$ )  $\delta$  144.87, 139.12, 135.66, 135.39, 130.97, 129.91, 128.76, 128.66, 126.90, 126.54, 124.83, 124.11, 123.24, 122.59, 119.89, 113.92, 31.51, 21.70. HRMS (ESI) calcd. for  $\text{C}_{22}\text{H}_{20}\text{NO}_2\text{S}$  [ $\text{M}+\text{H}^+$ ]: 362.1209, found:362.1207.

## 6. Reference

- [1] Y.-Y. Liu, X.-Y. Yu, J.-R. Chen, M.-M. Q, X.-T. Q, D.-Q. Shi and W.-J. X. *Angew. Chem. Int. Ed.* 2017, **56**, 9527.
- [2] H.-R. Wang, E.-H. Huang, C. Luo, W.-F. Luo, Y. Xu, P.-C. Qian, J.-M. Zhou, L.-W. Ye, *Chem. Commun.* 2020, **56**, 4832.

## 7. $^1\text{H}$ NMR, $^{13}\text{C}$ NMR and HPLC Spectra

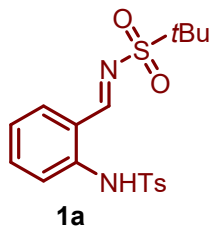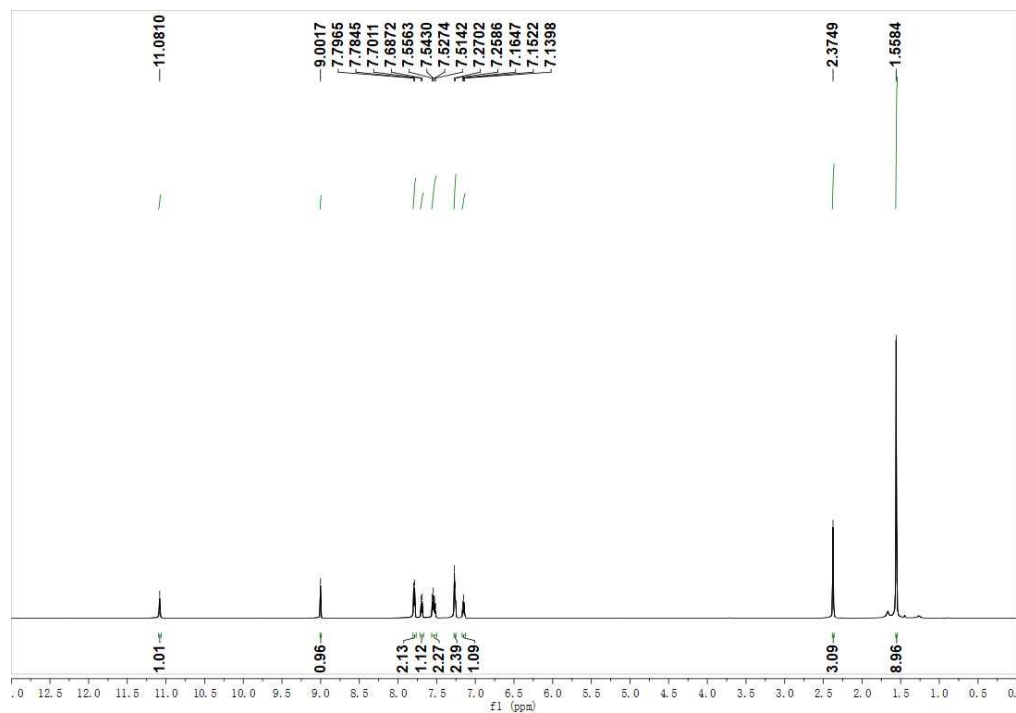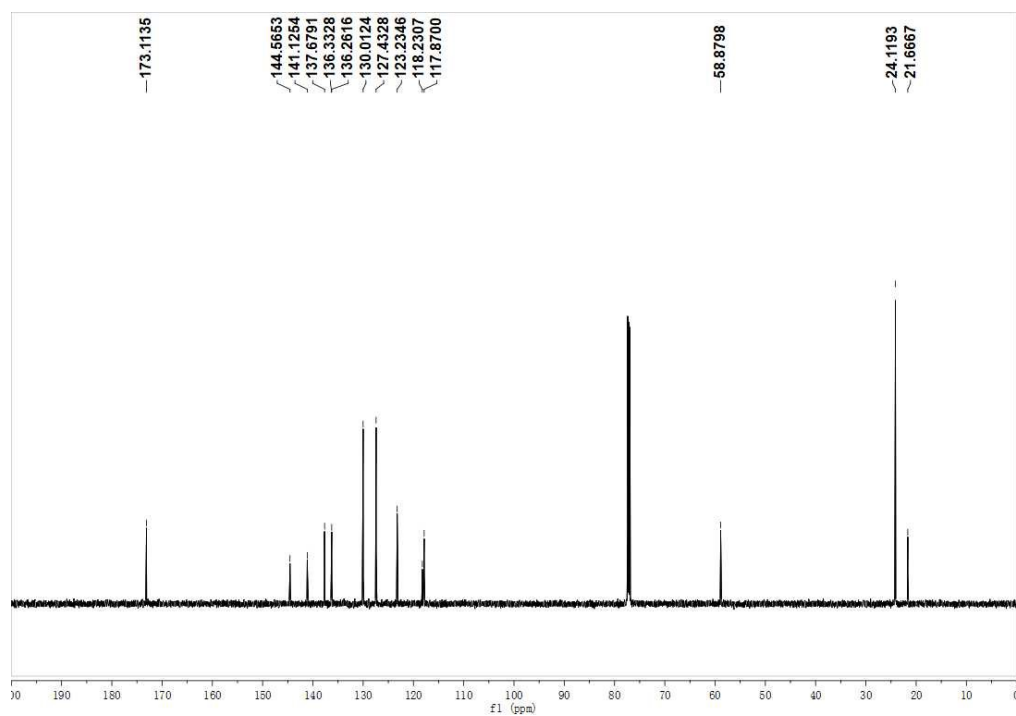

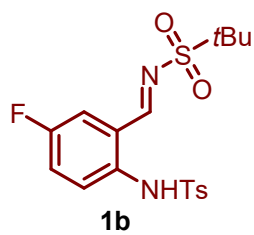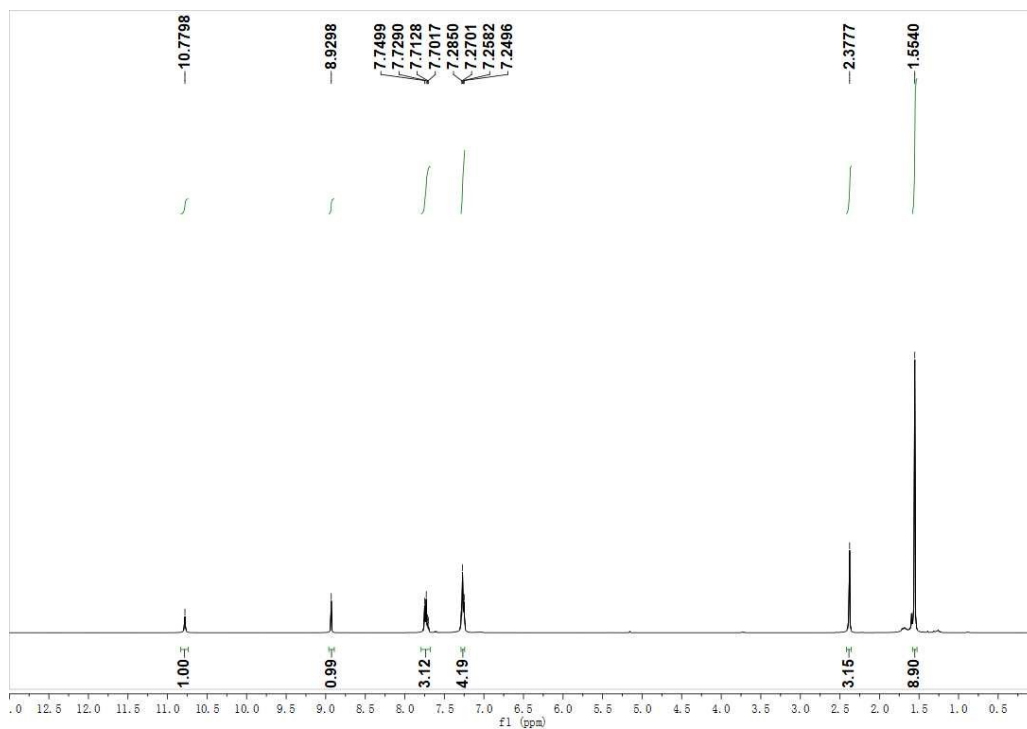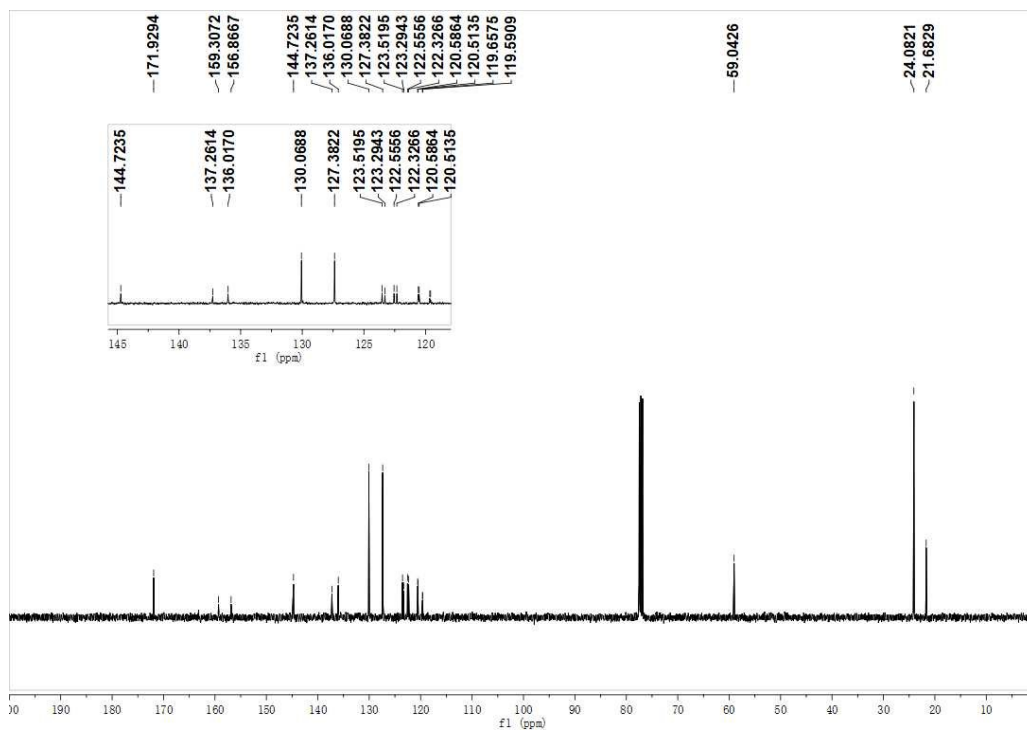

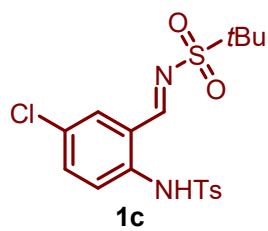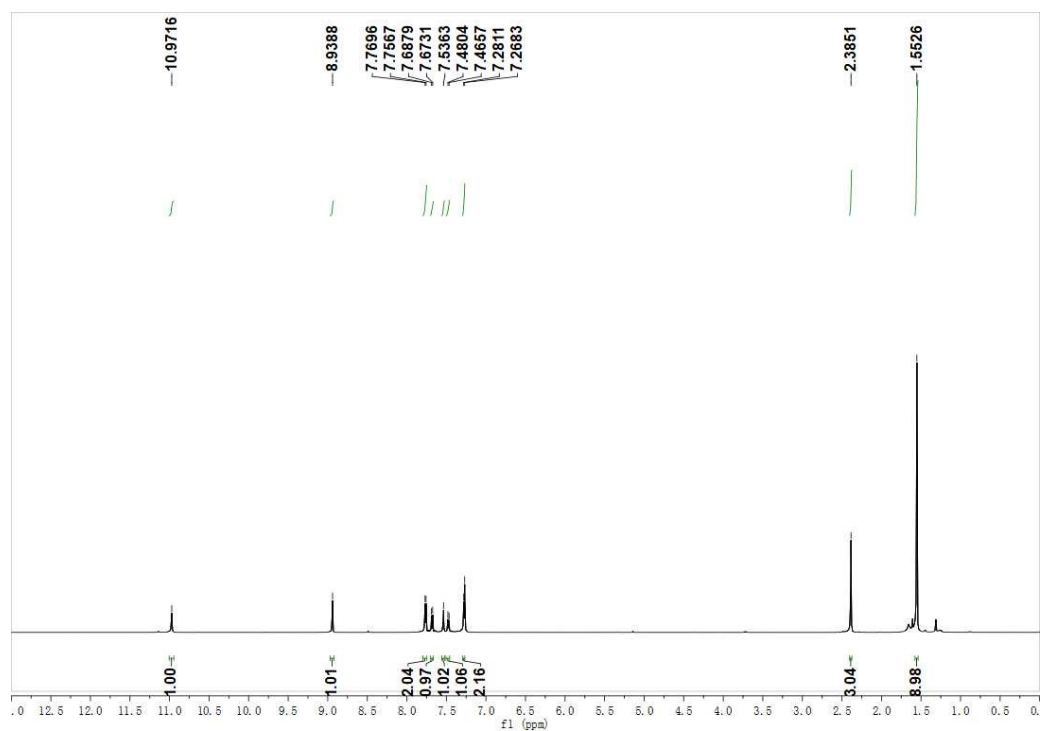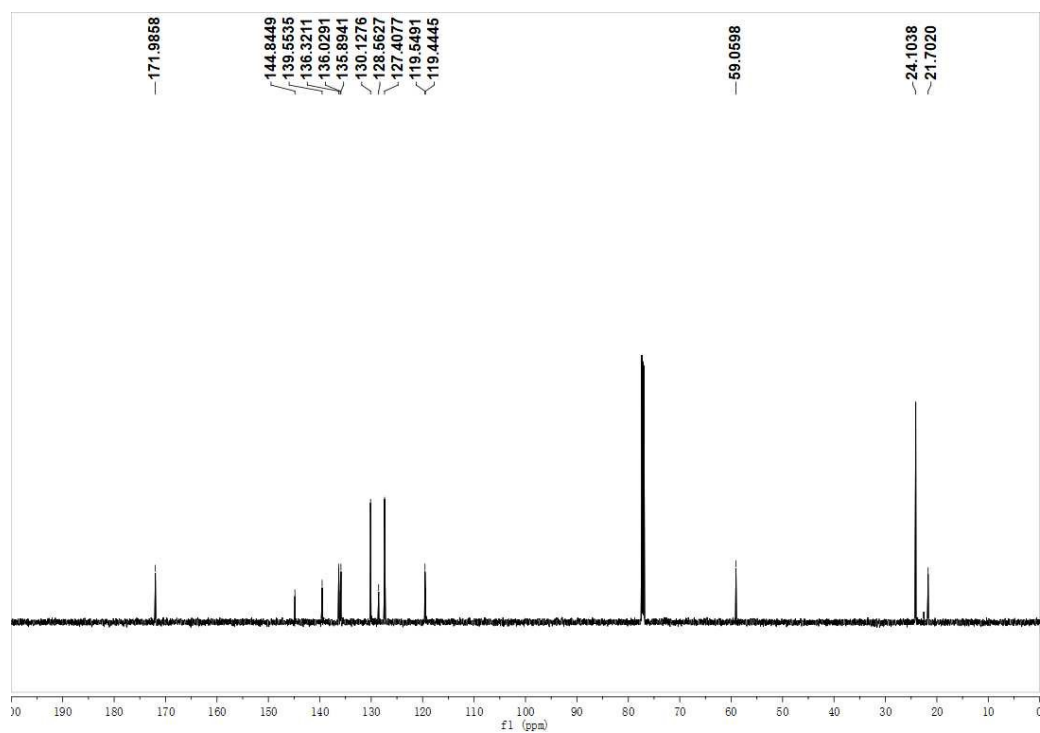

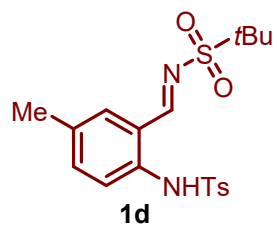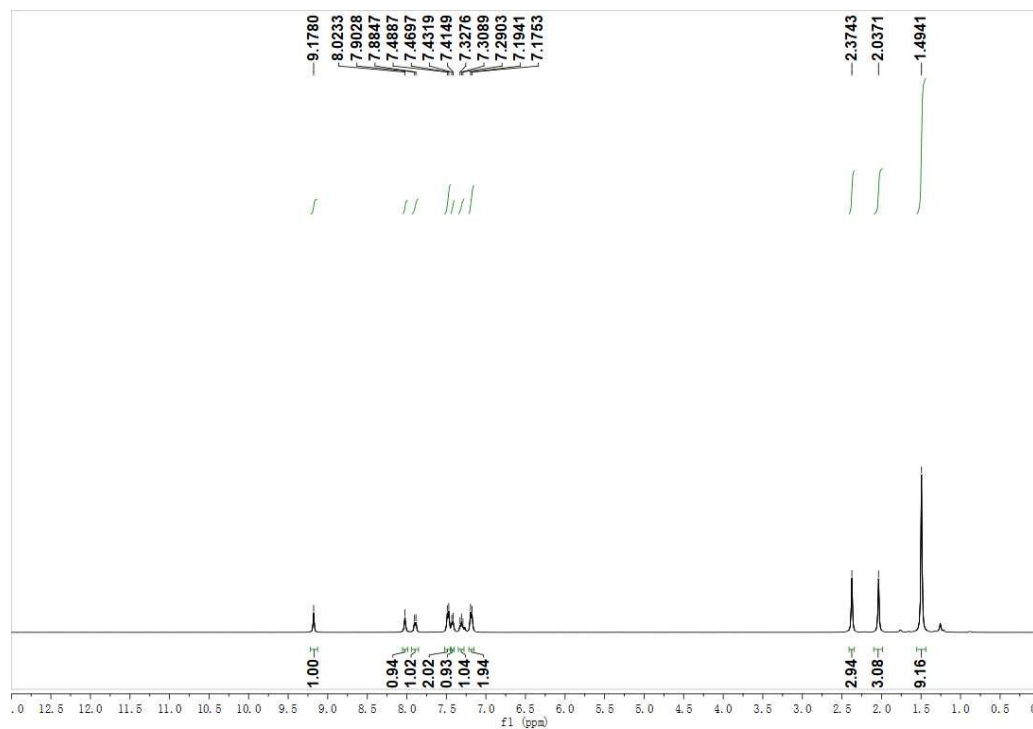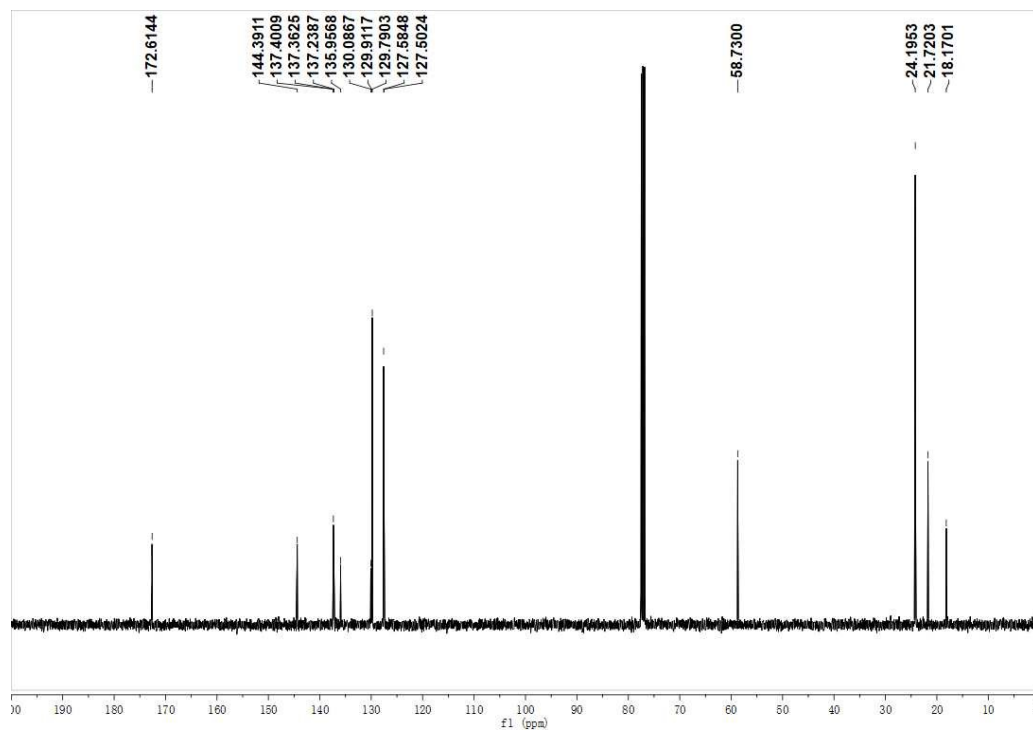

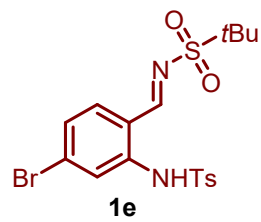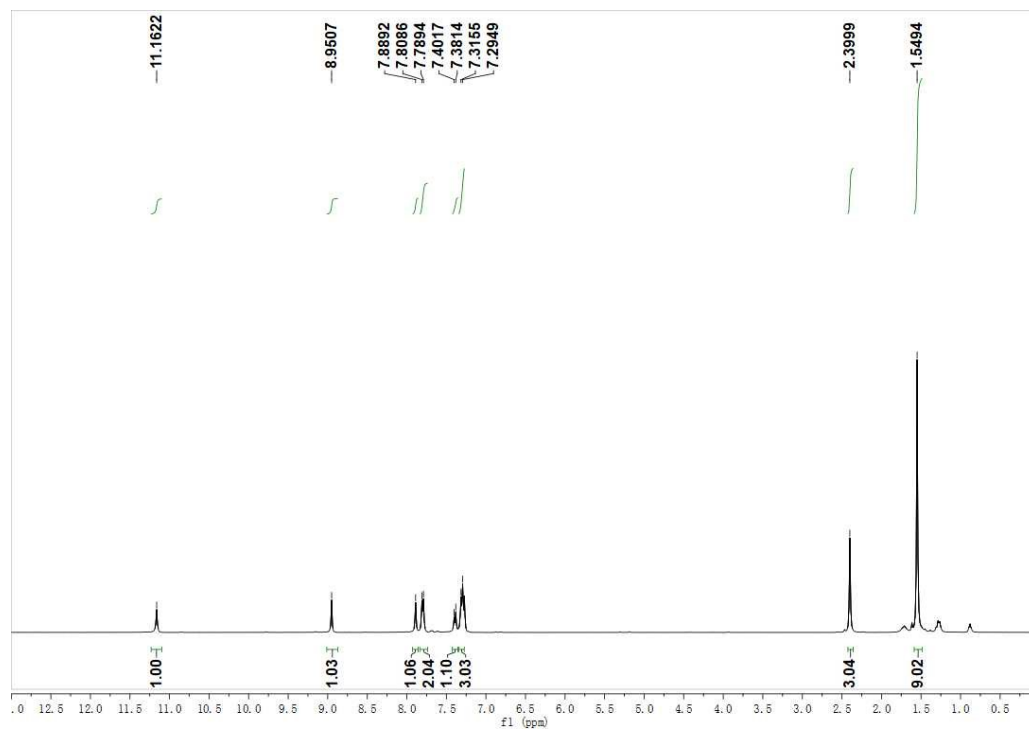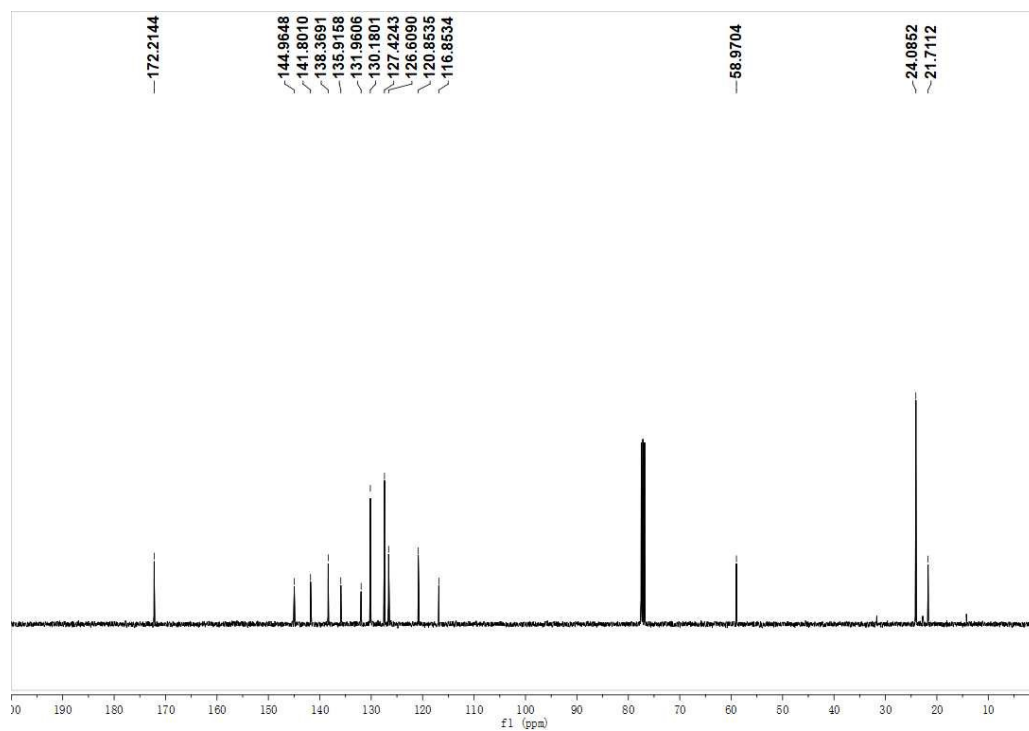



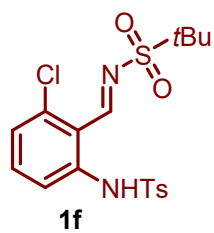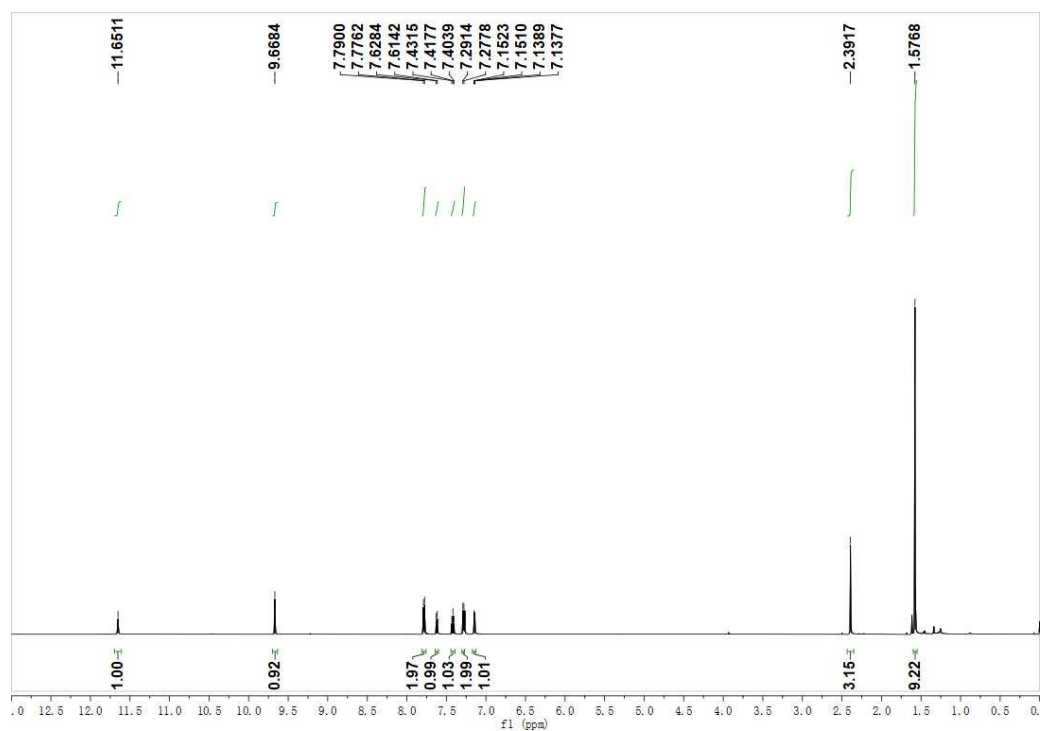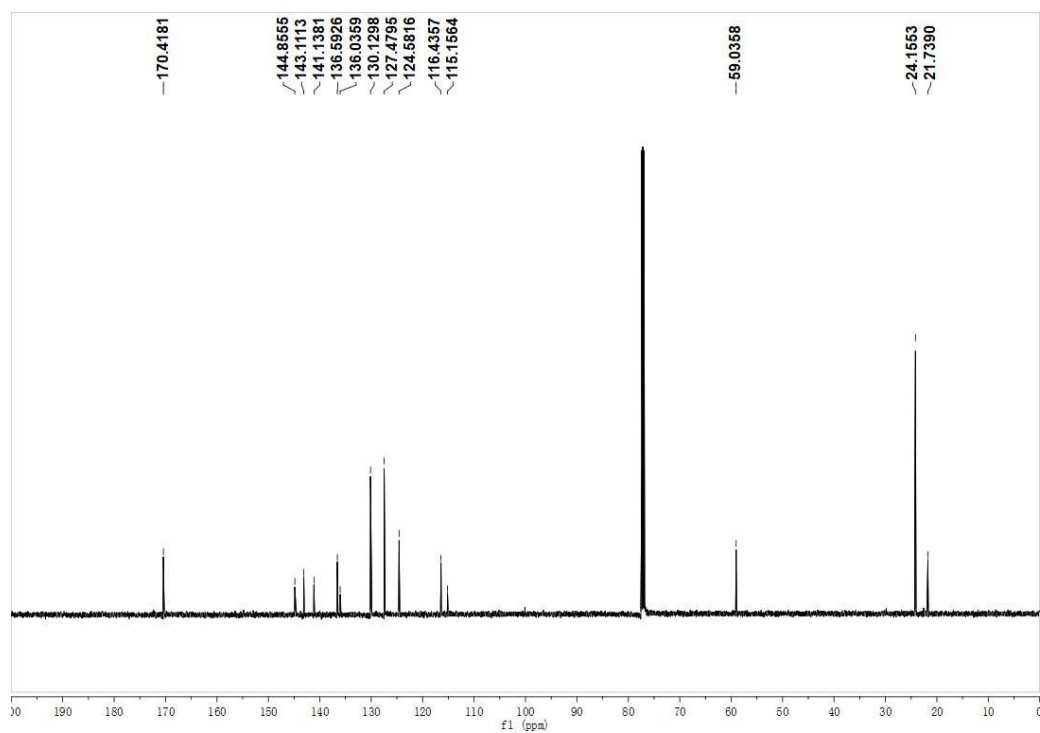

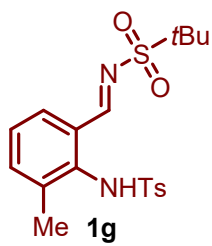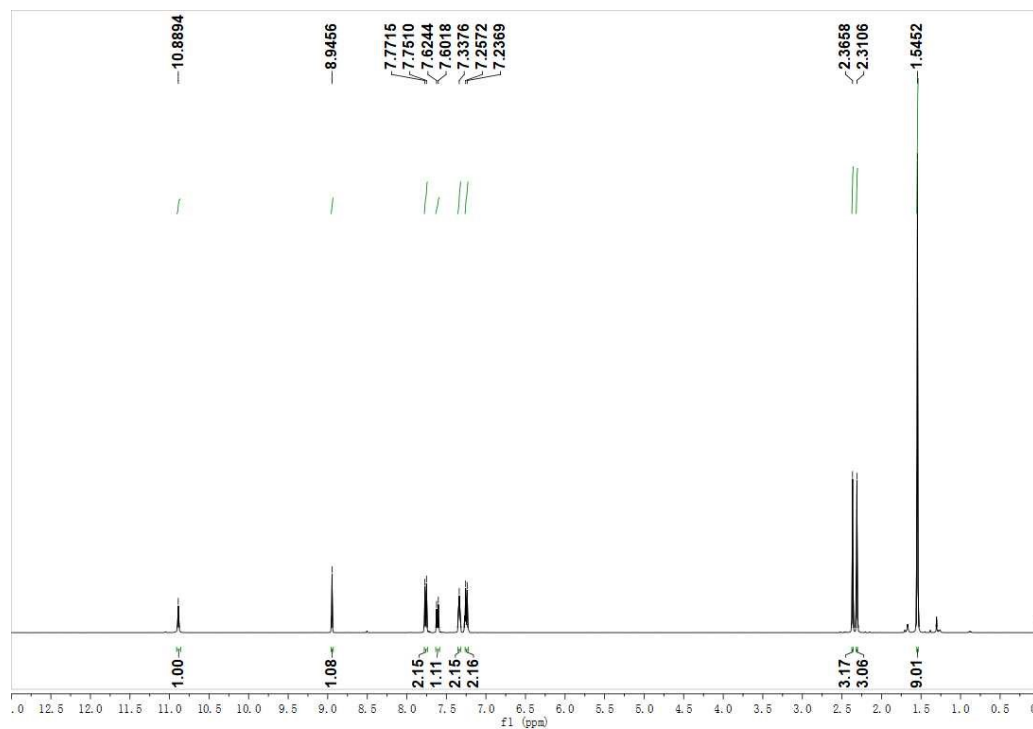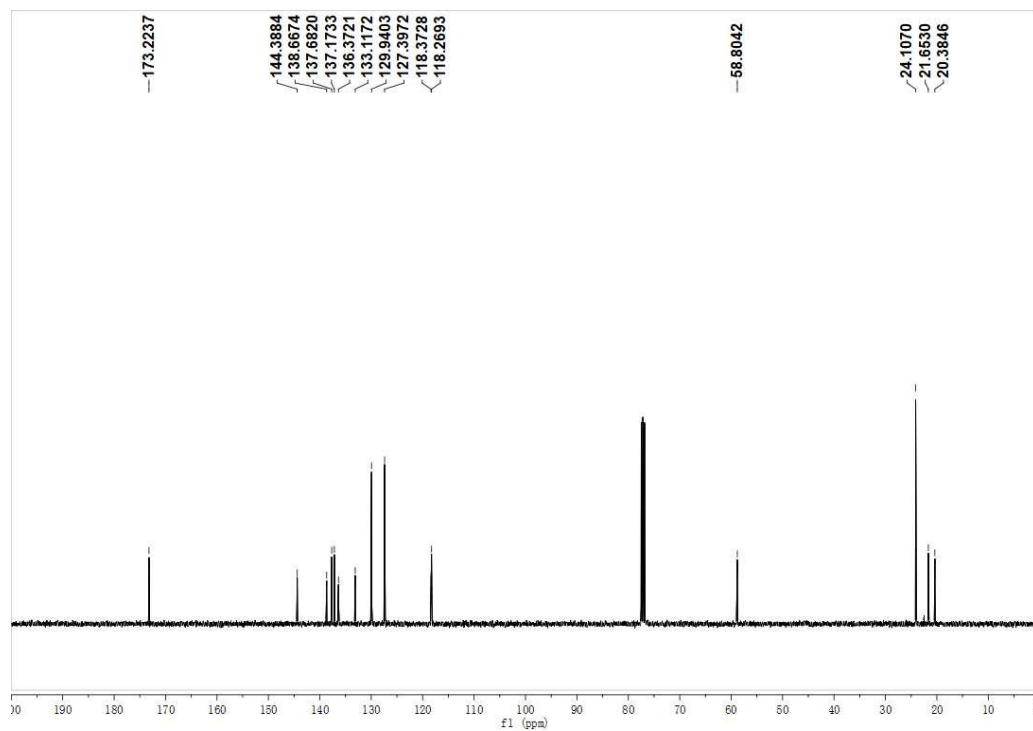

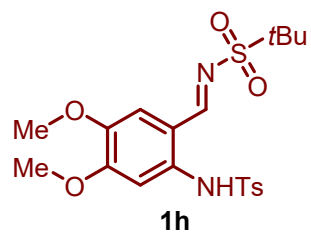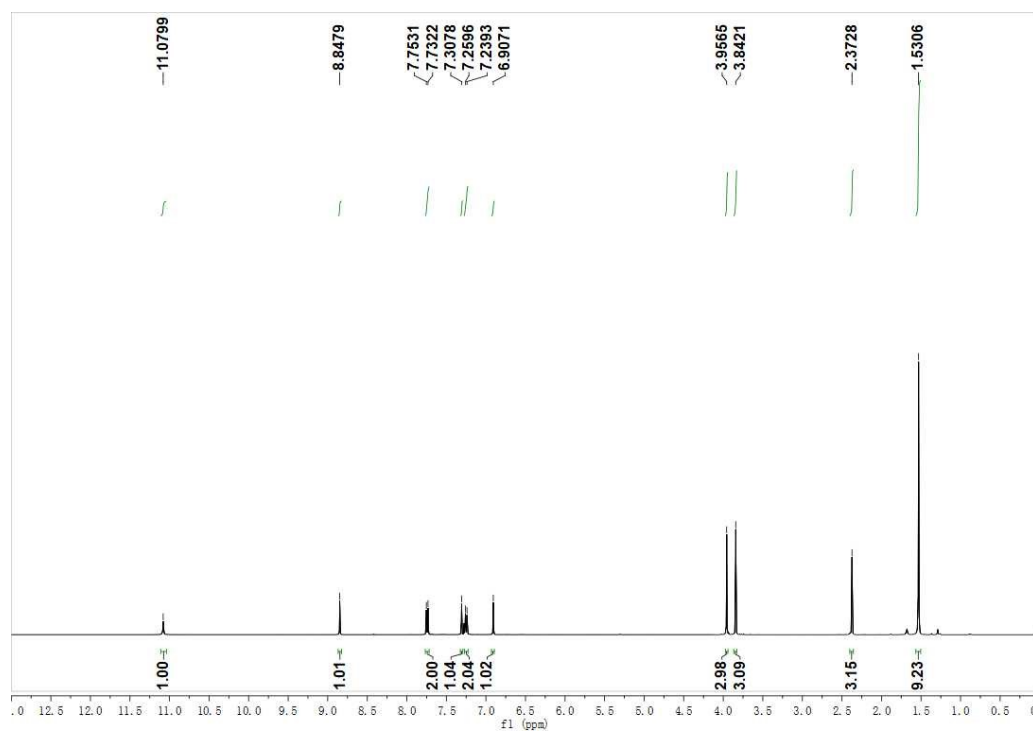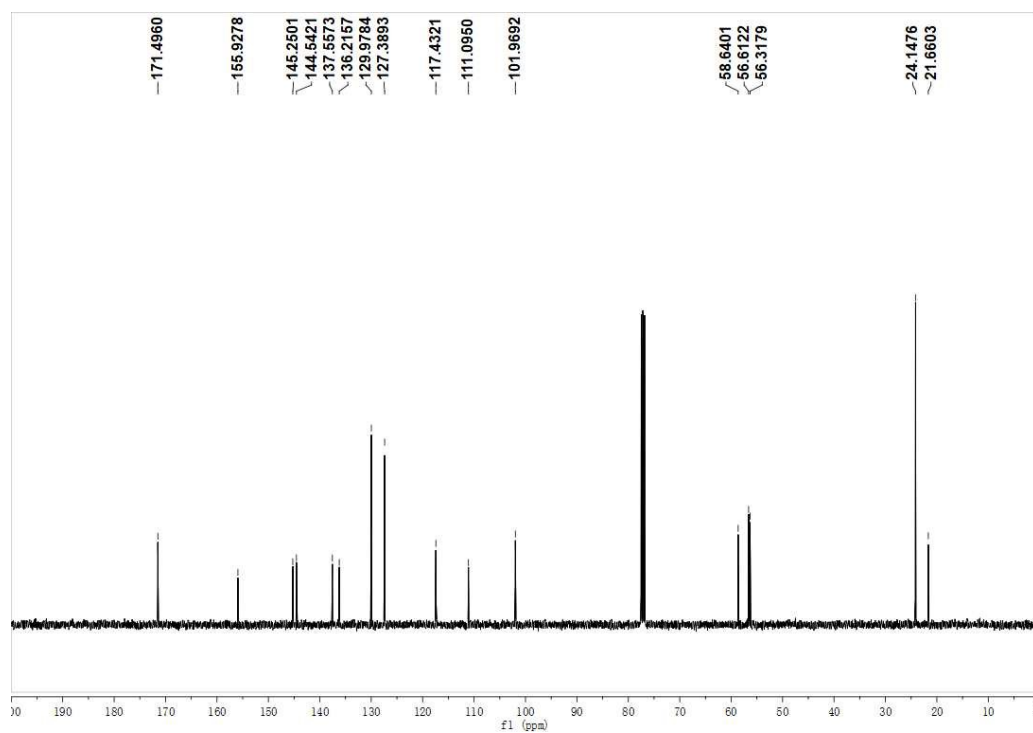

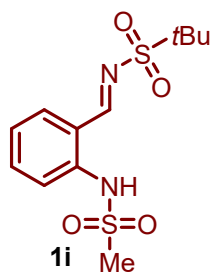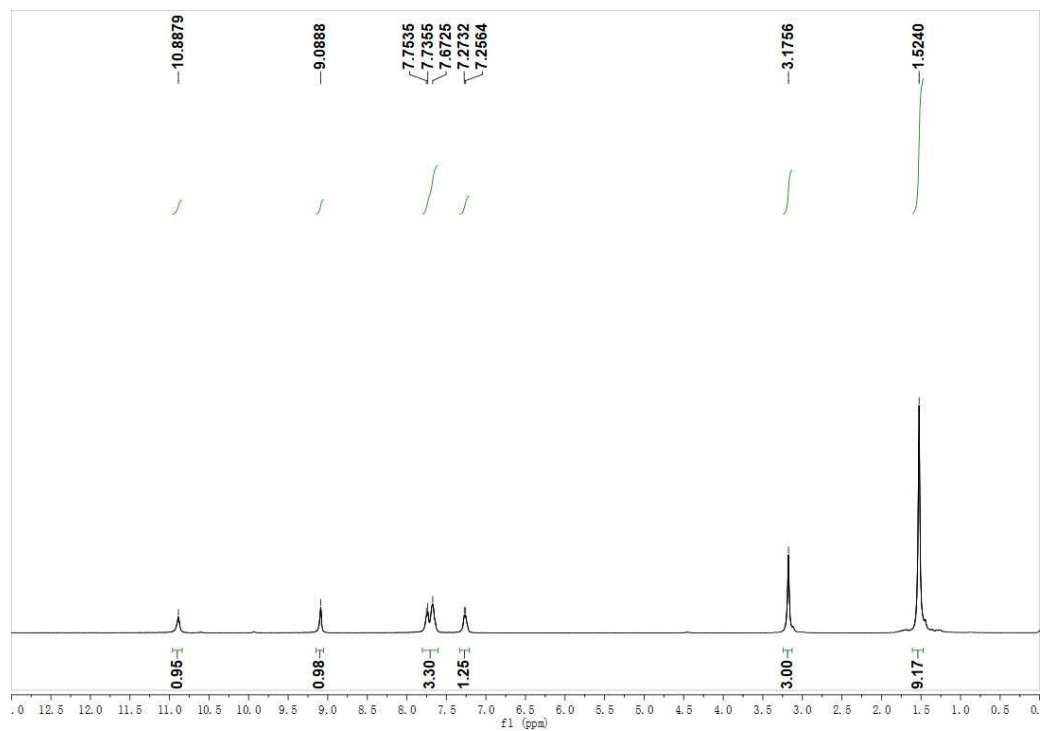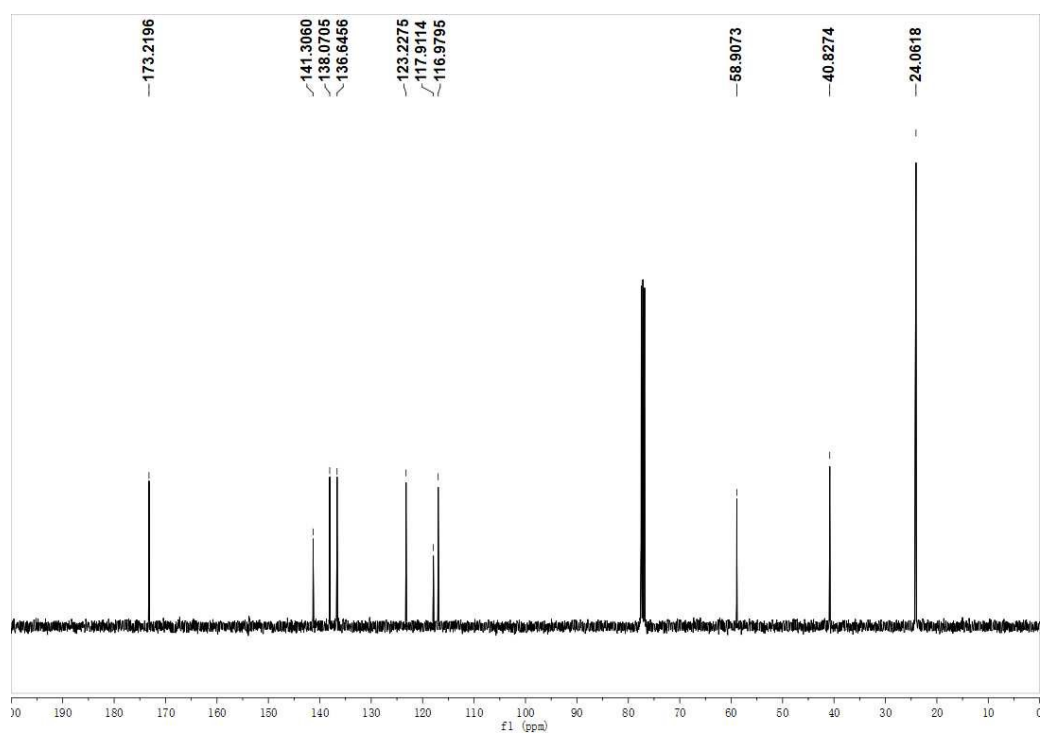

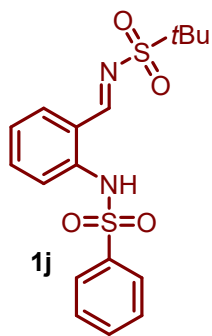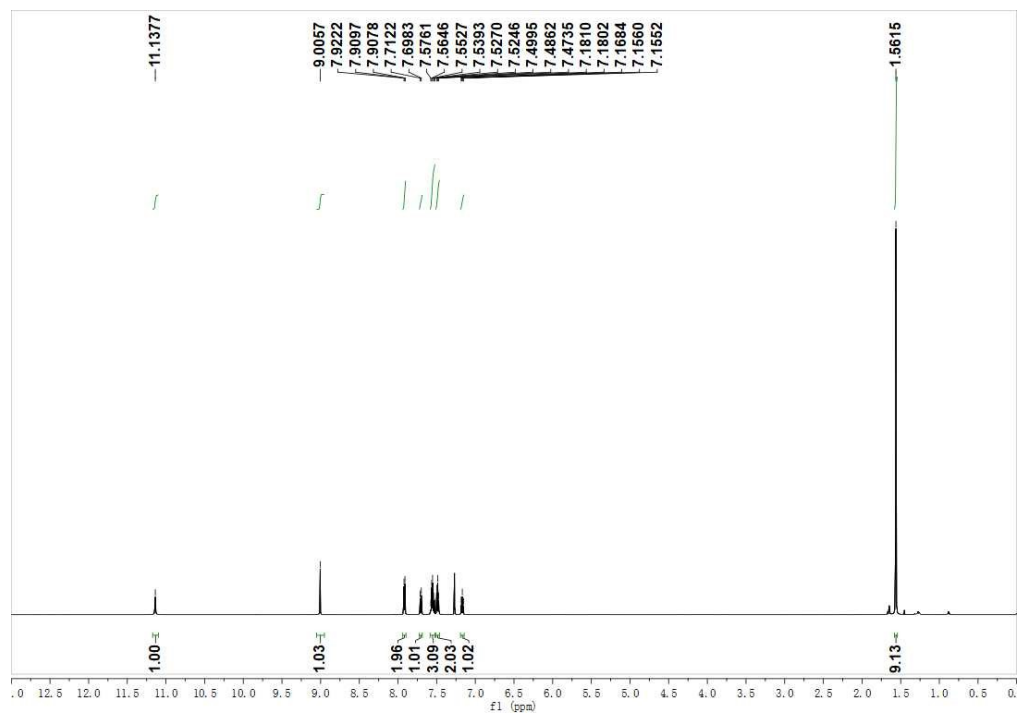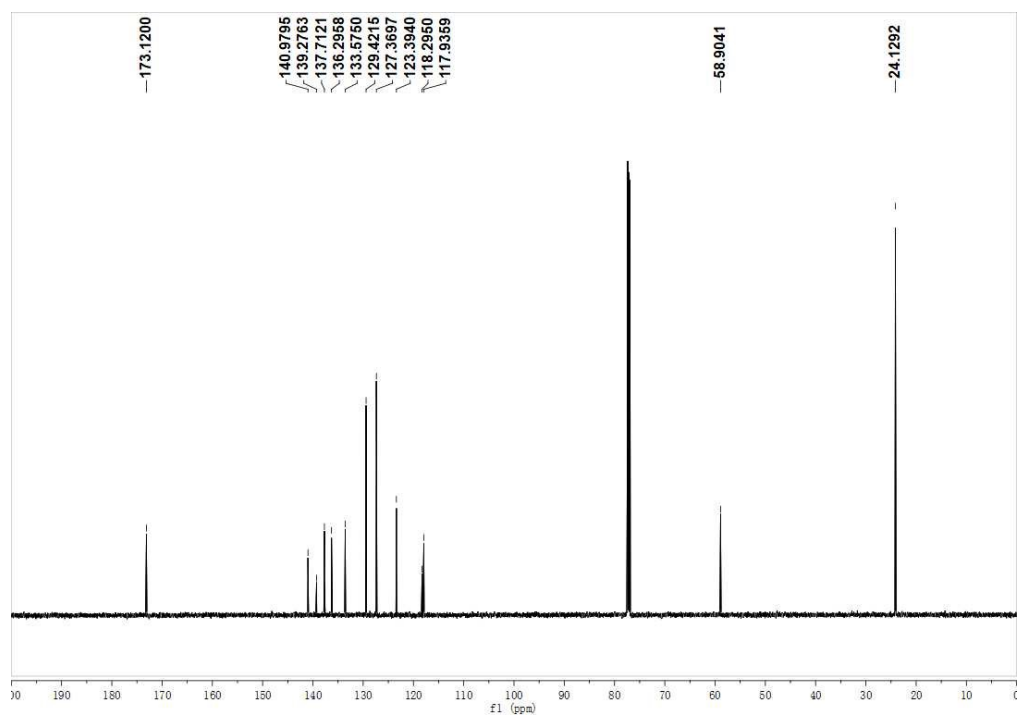

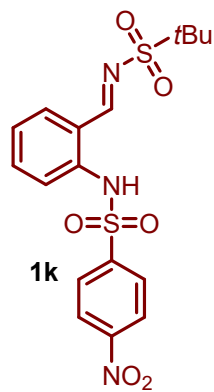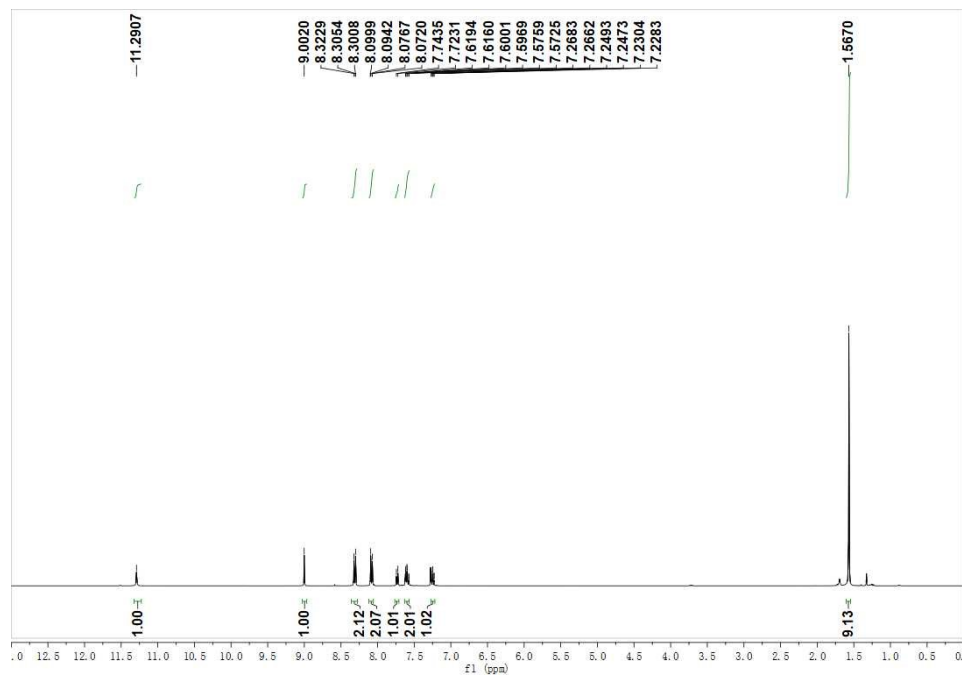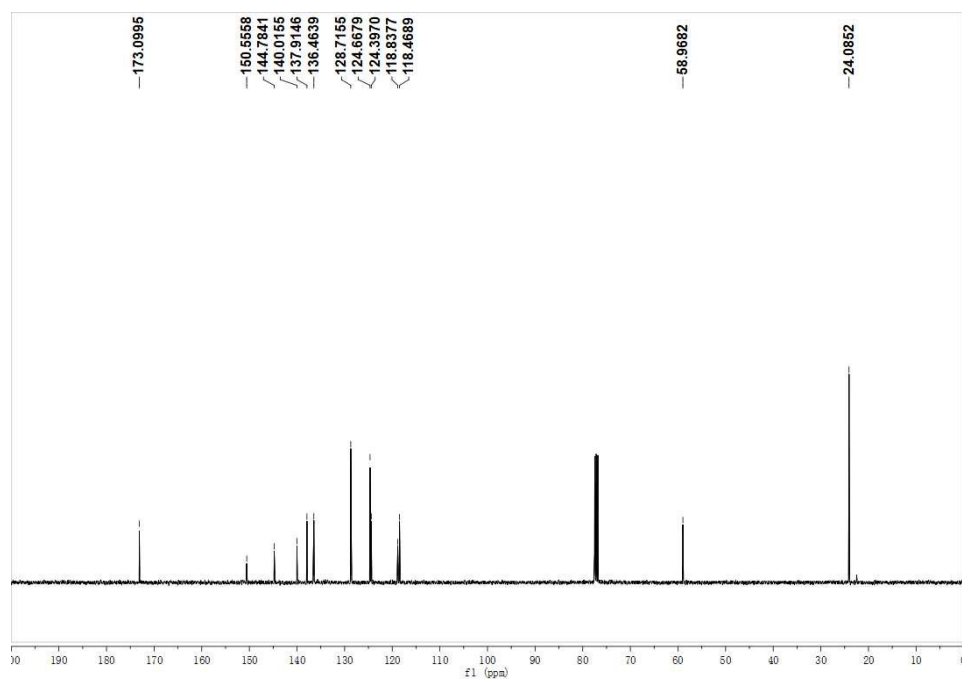

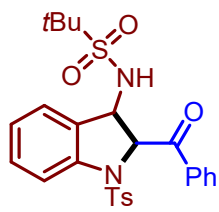

**3a**

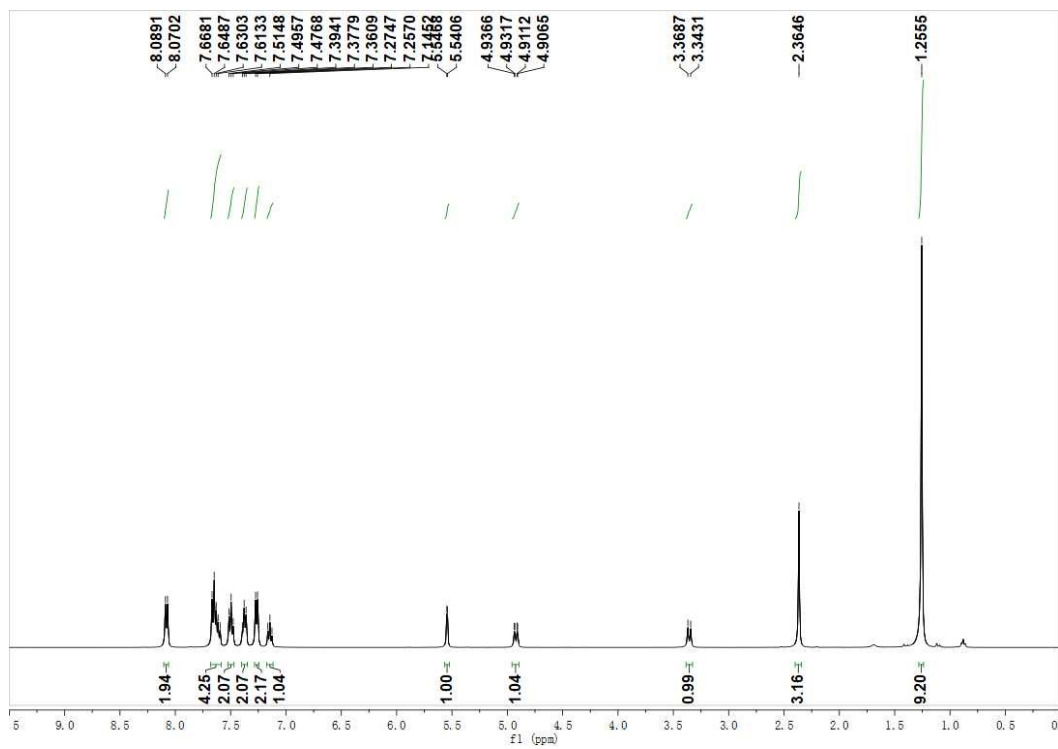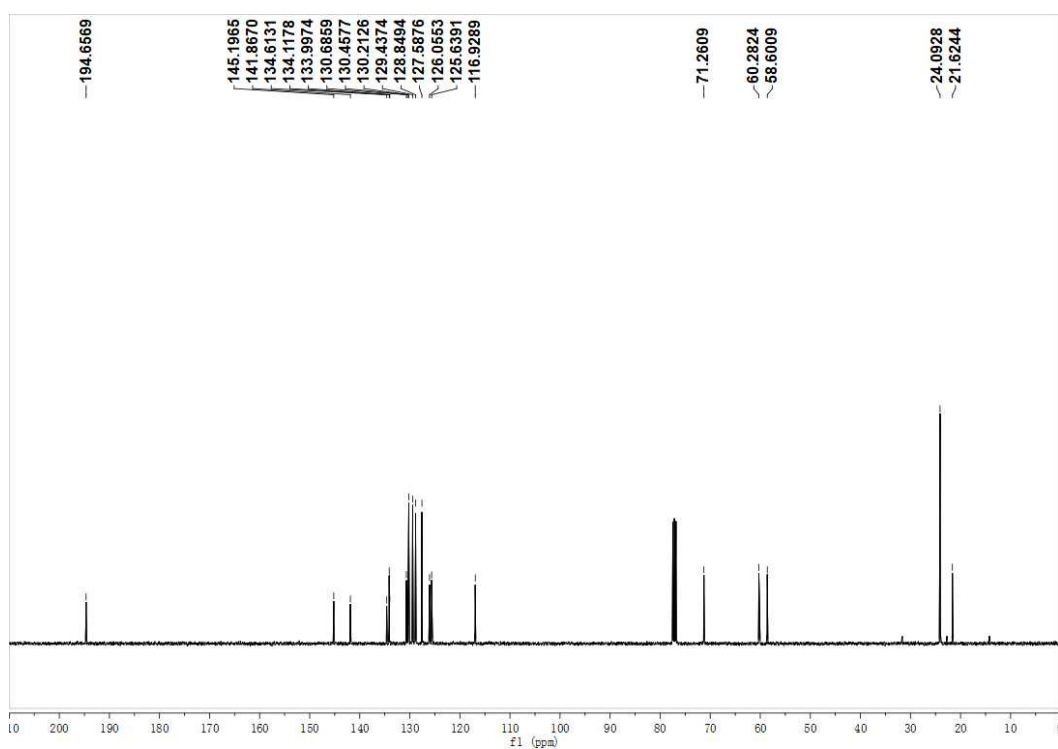

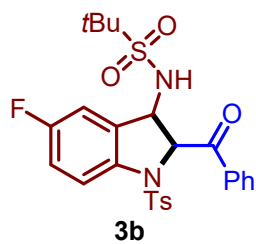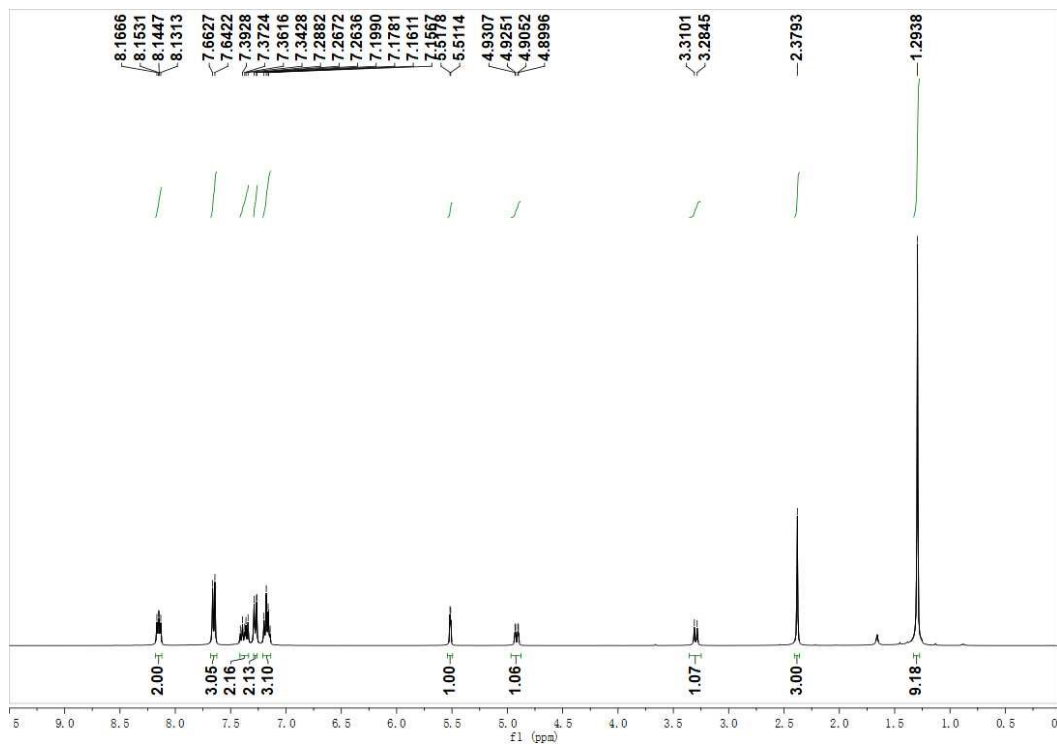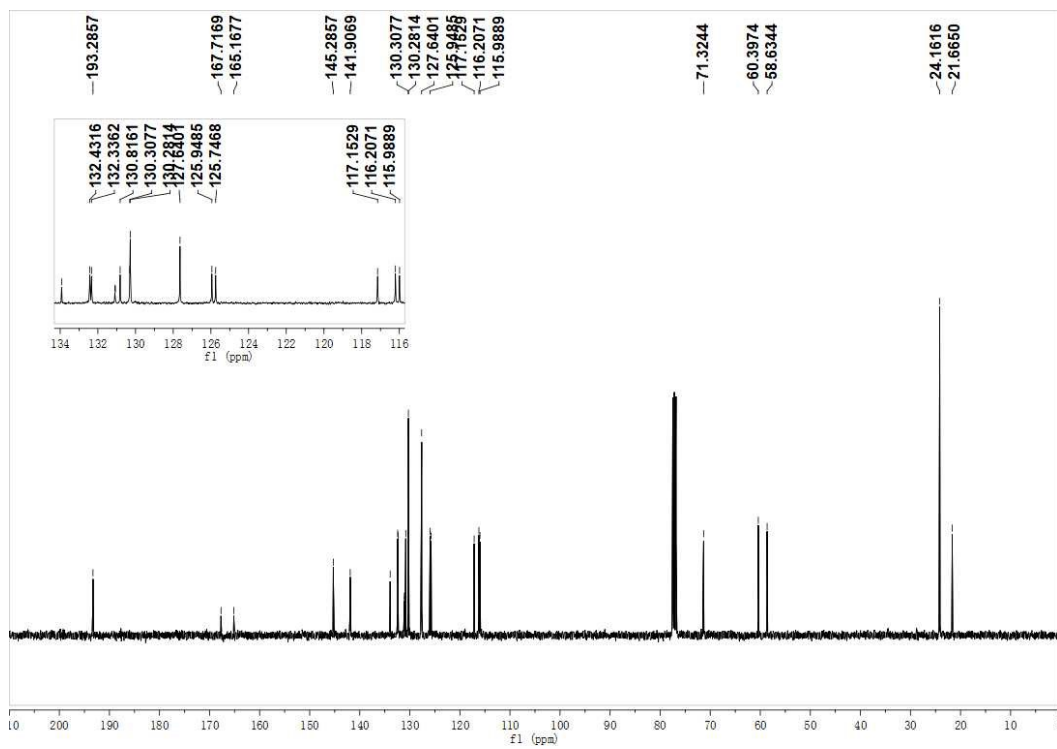



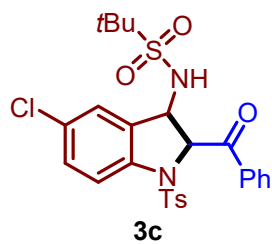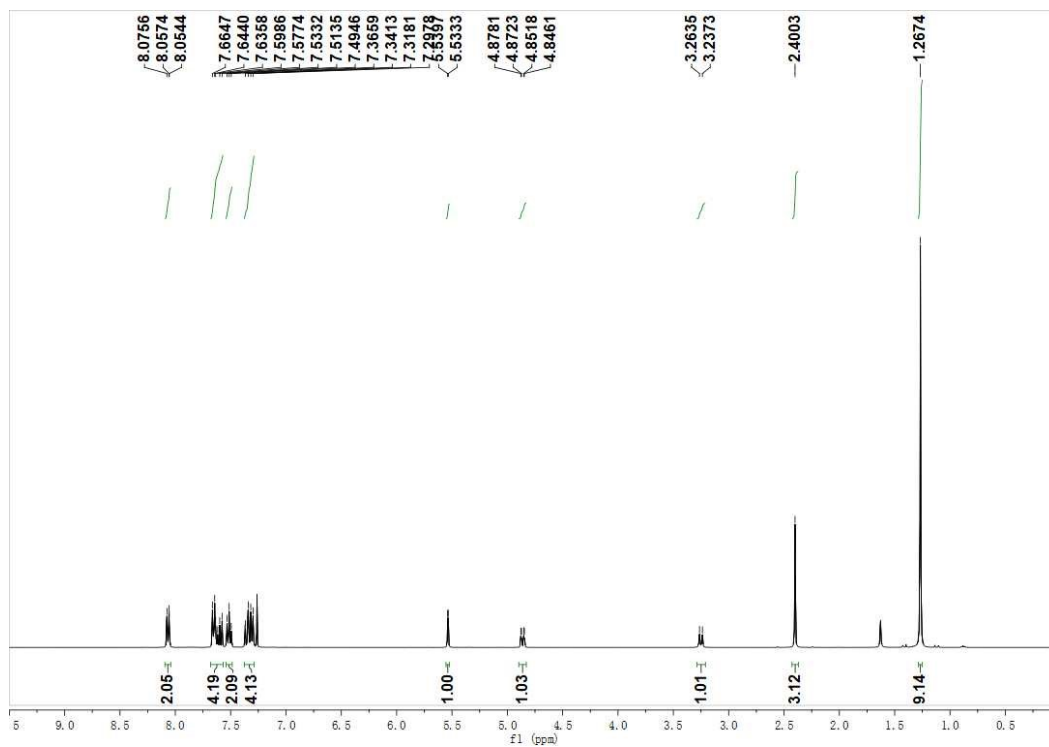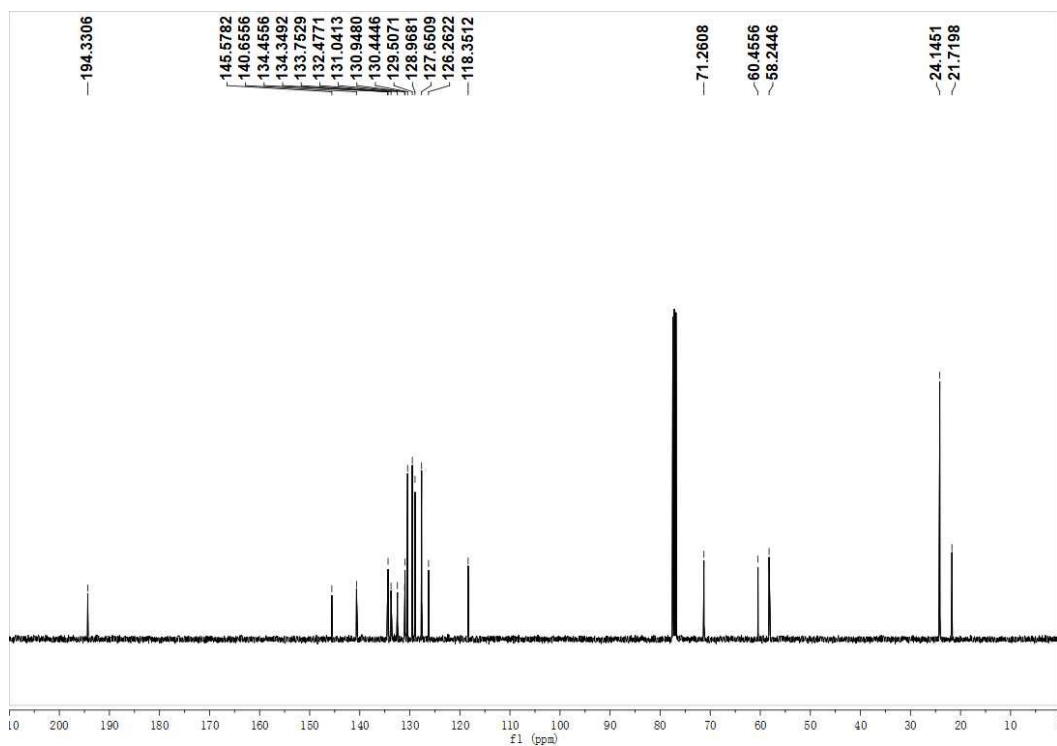

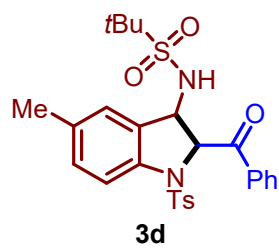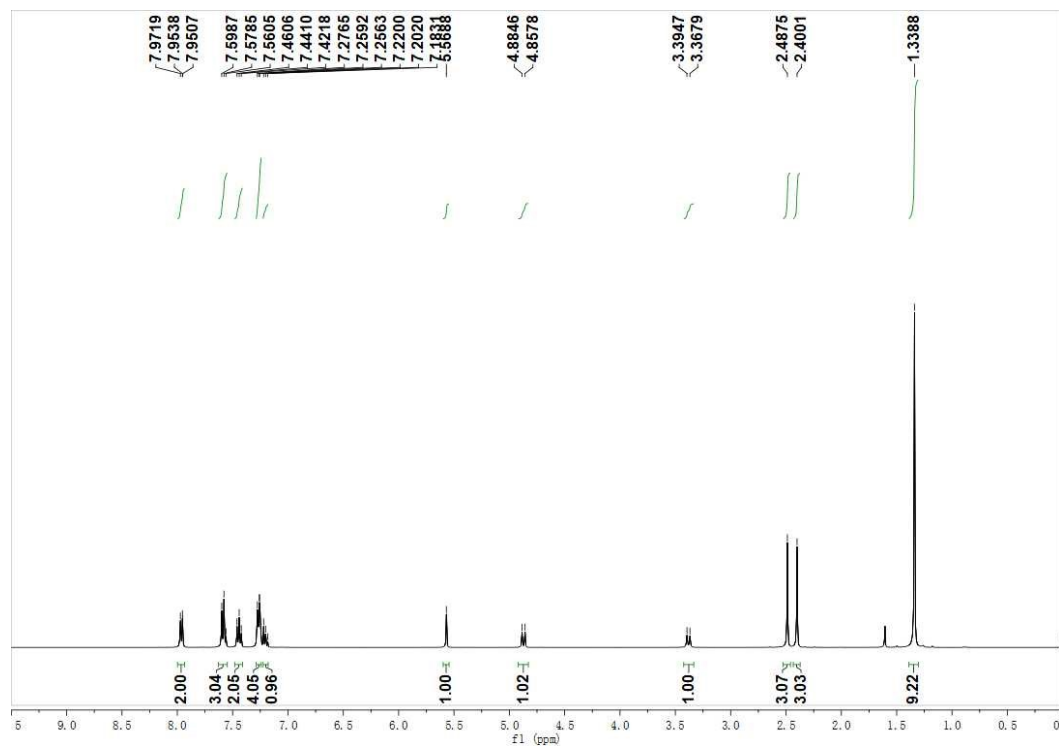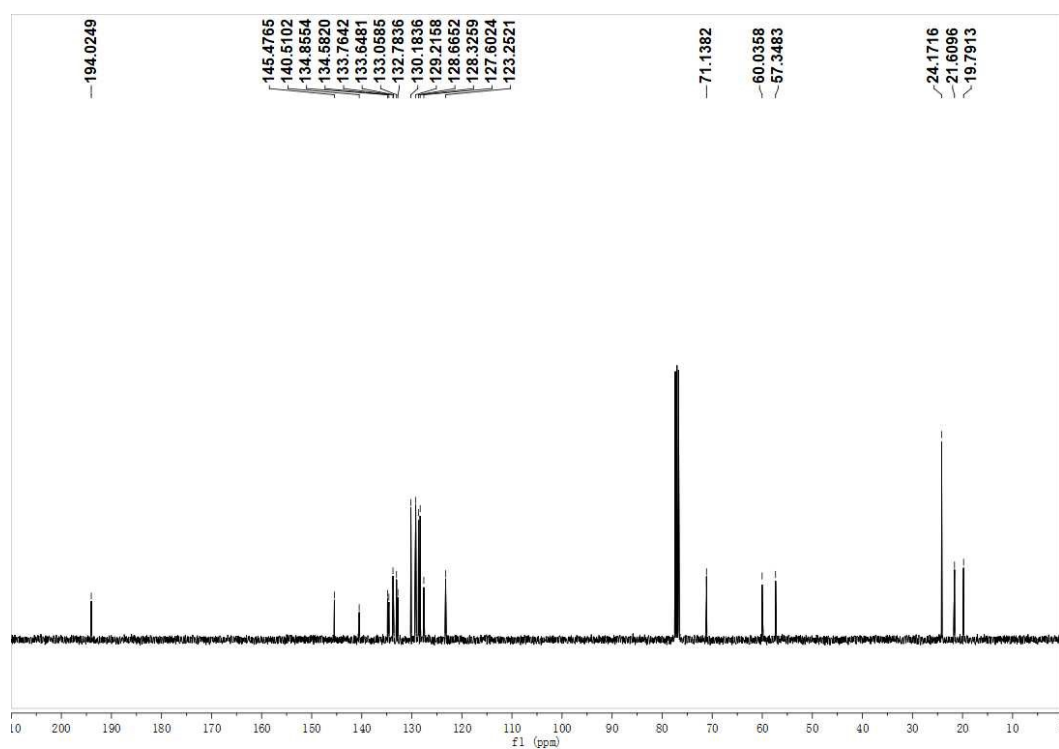

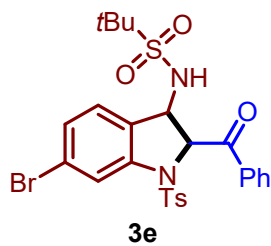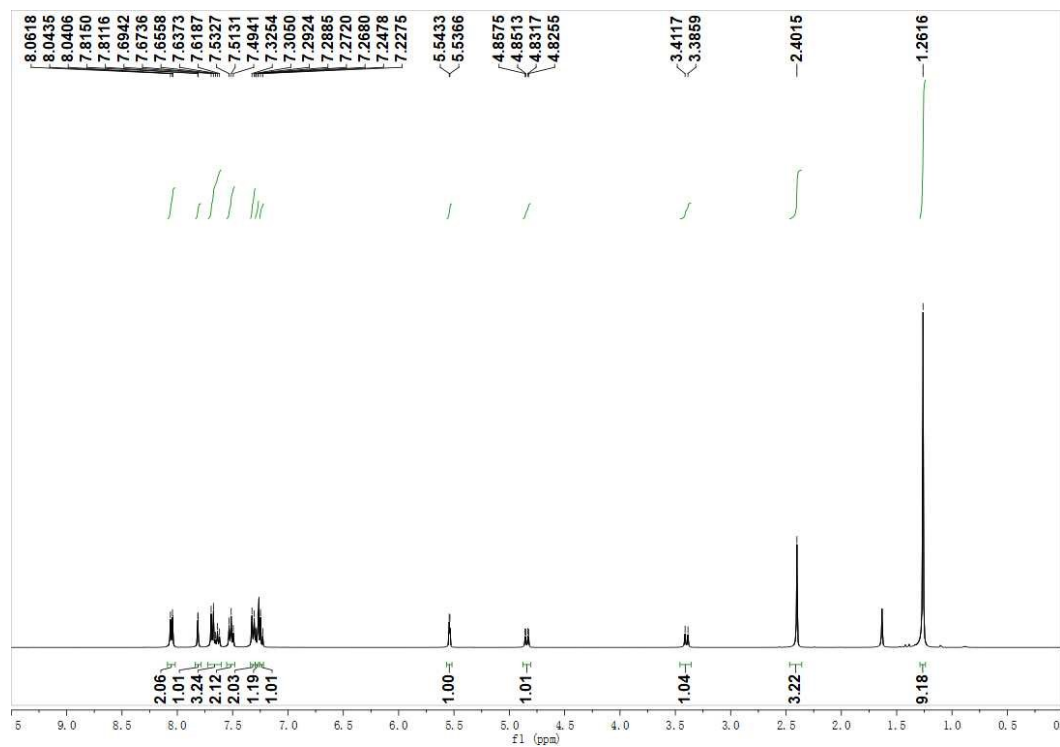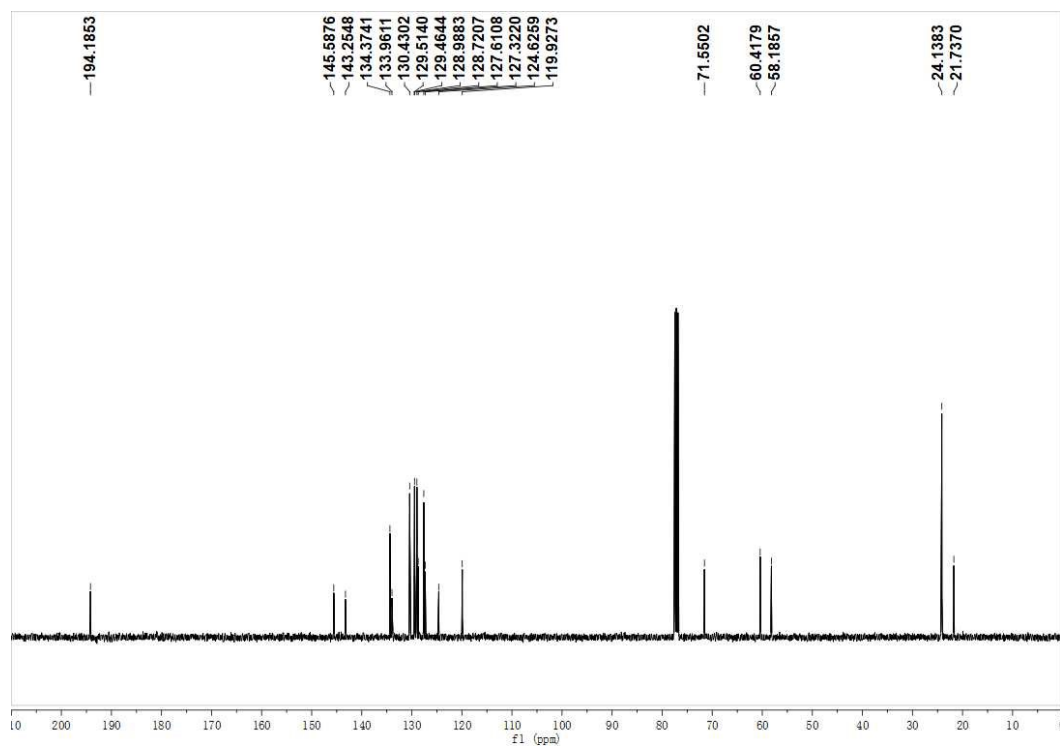

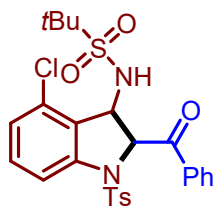

**3f**

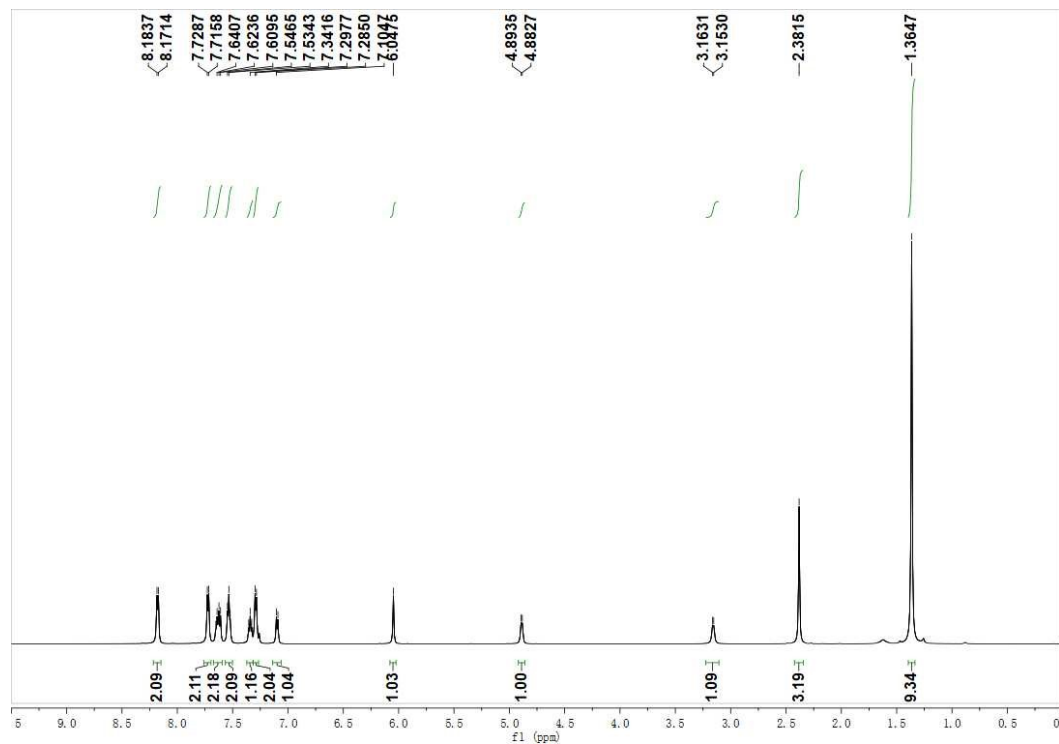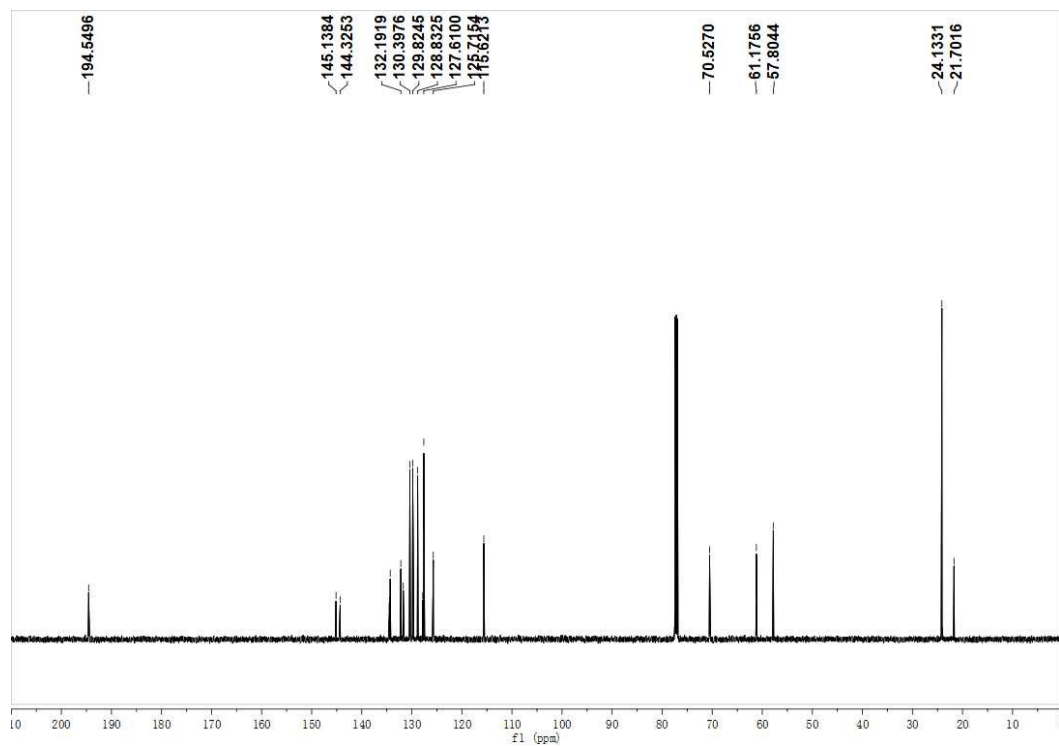

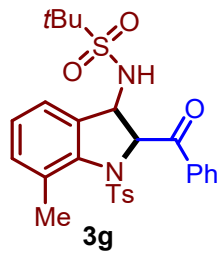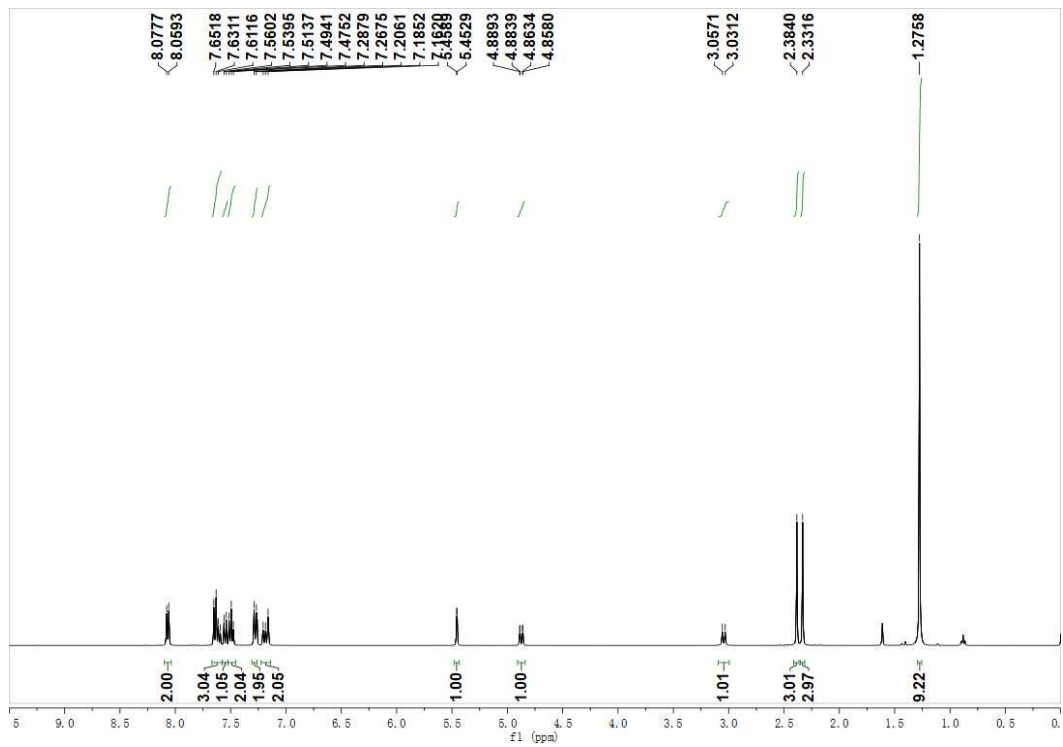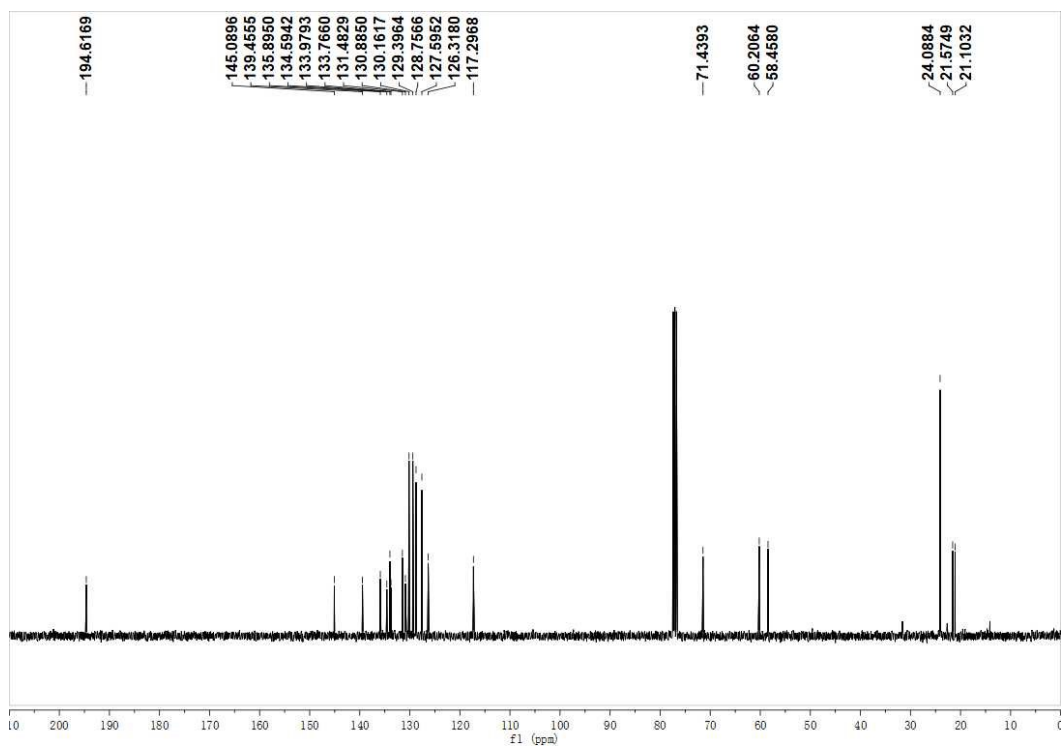

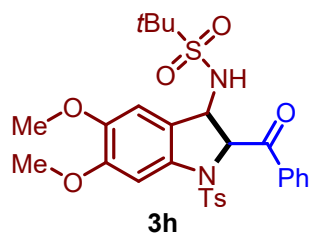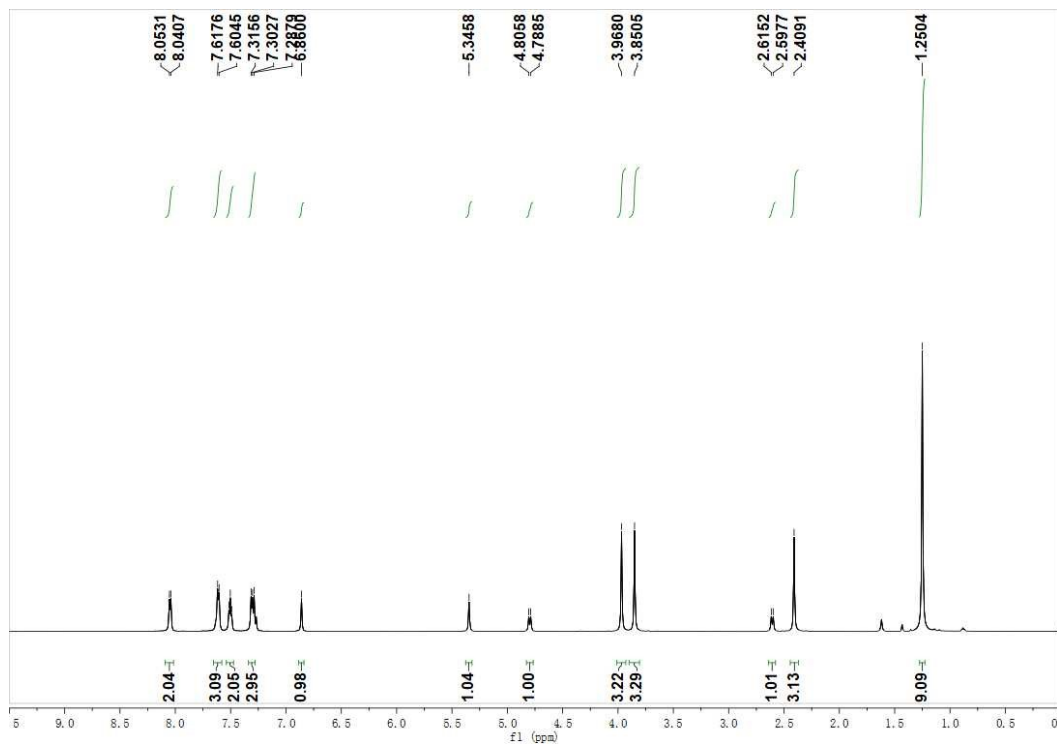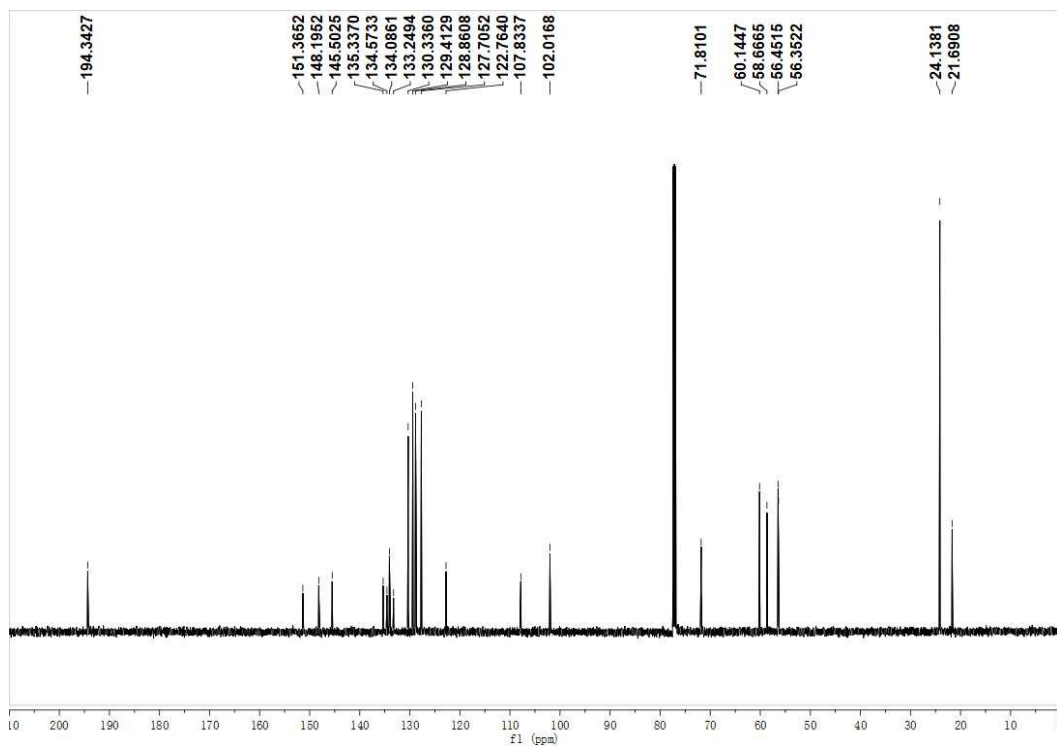

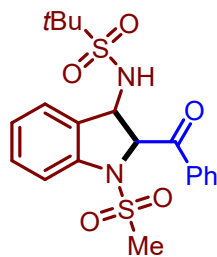

**3i**

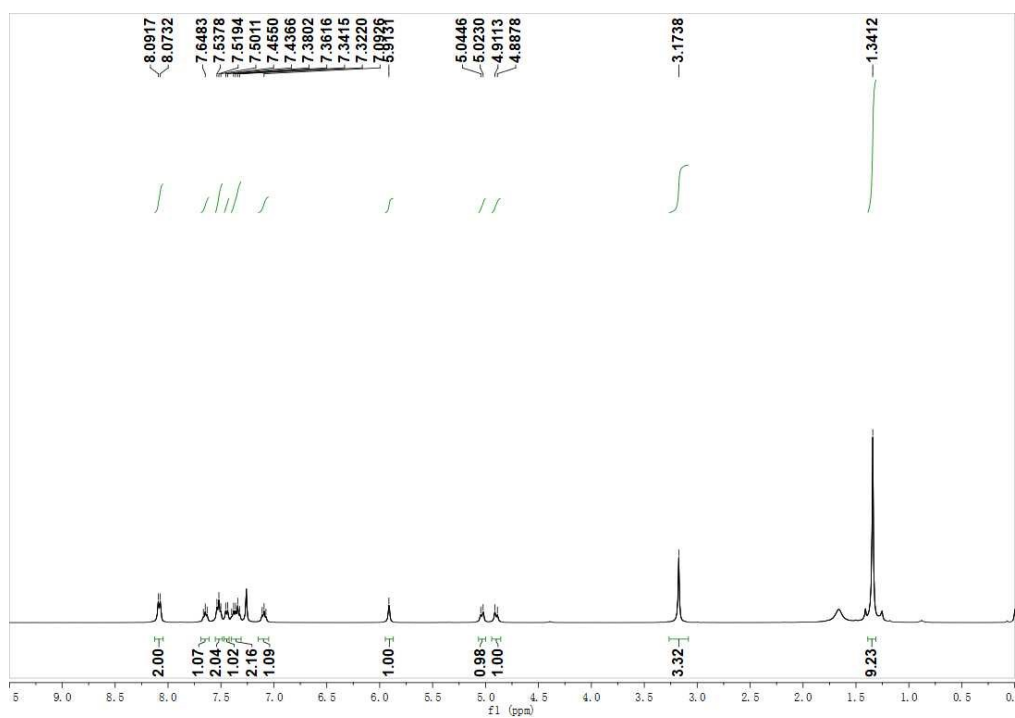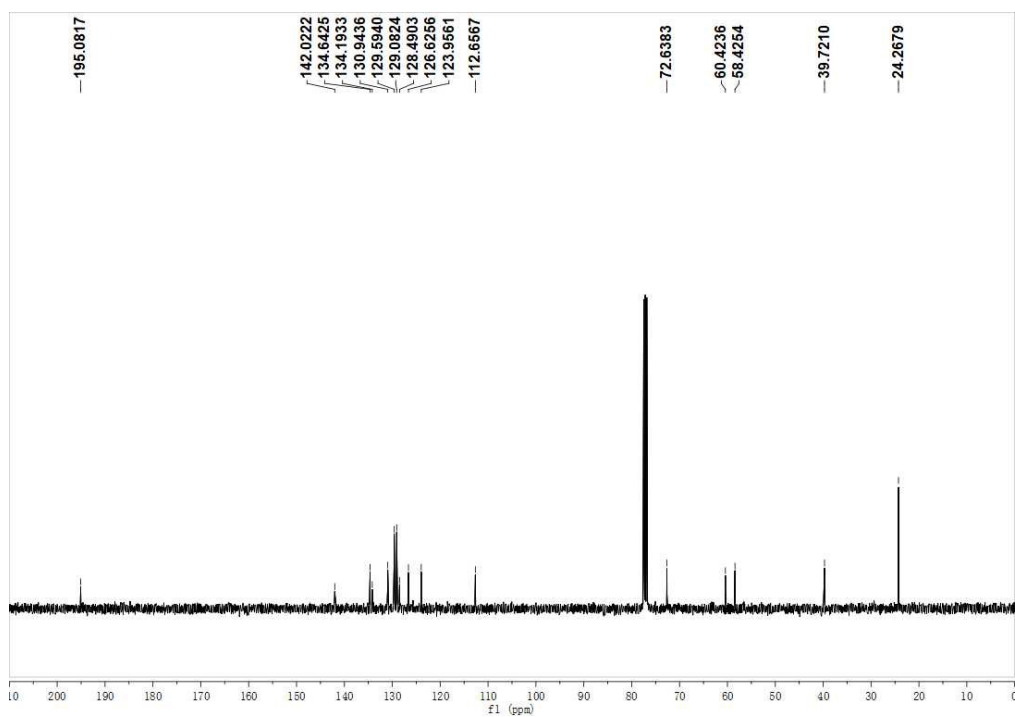

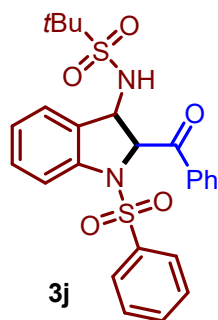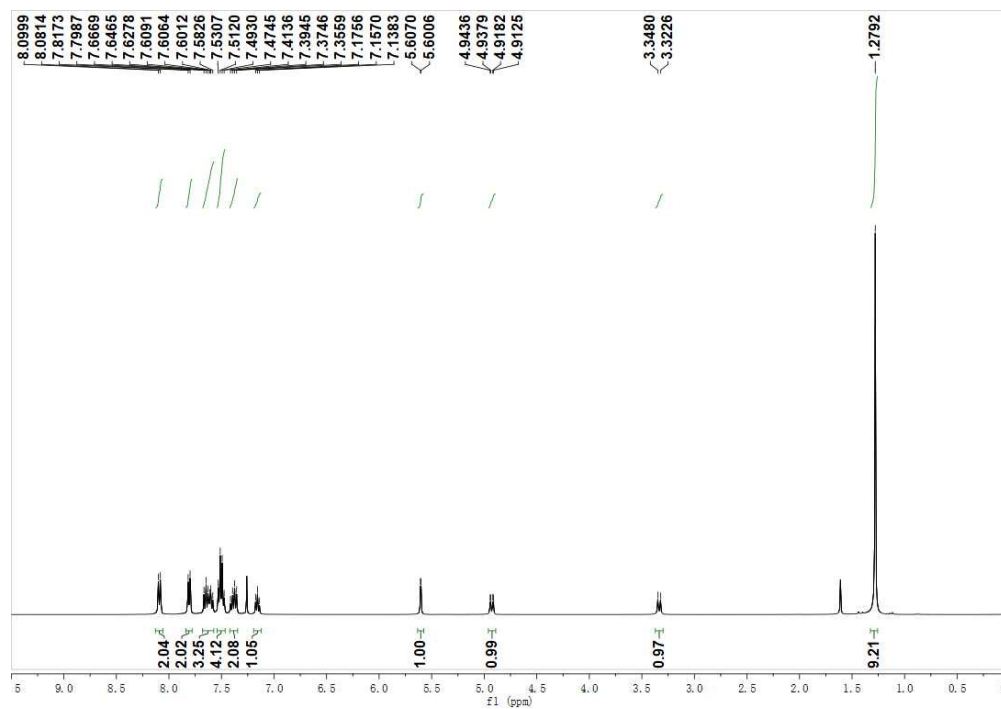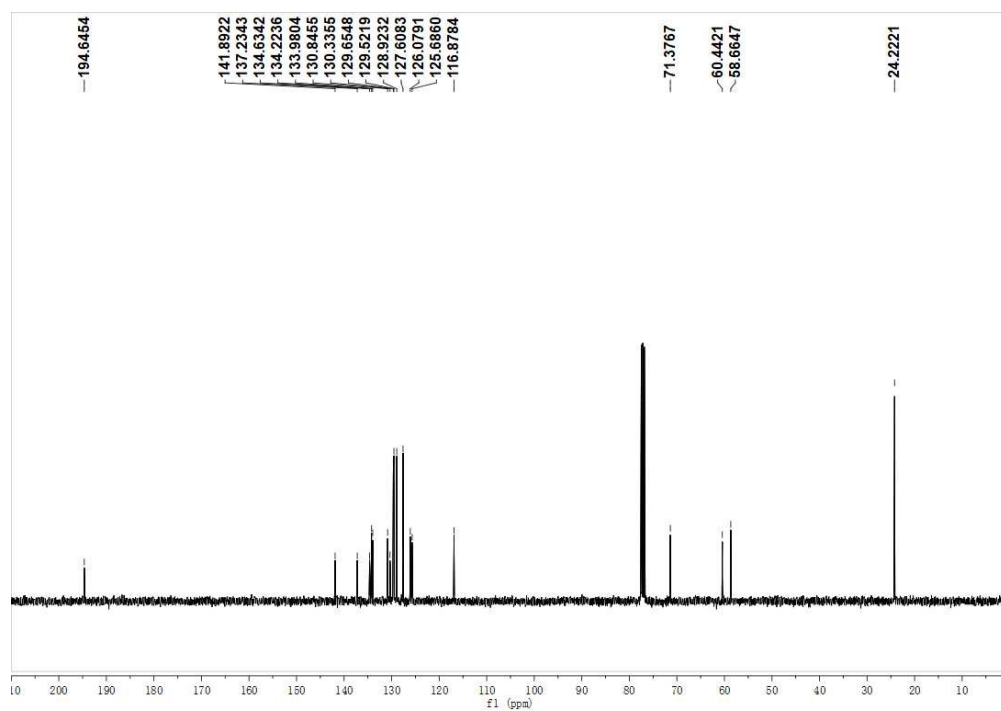



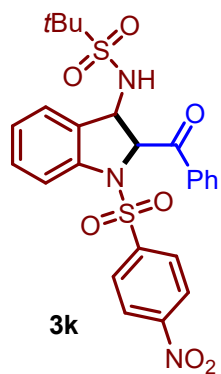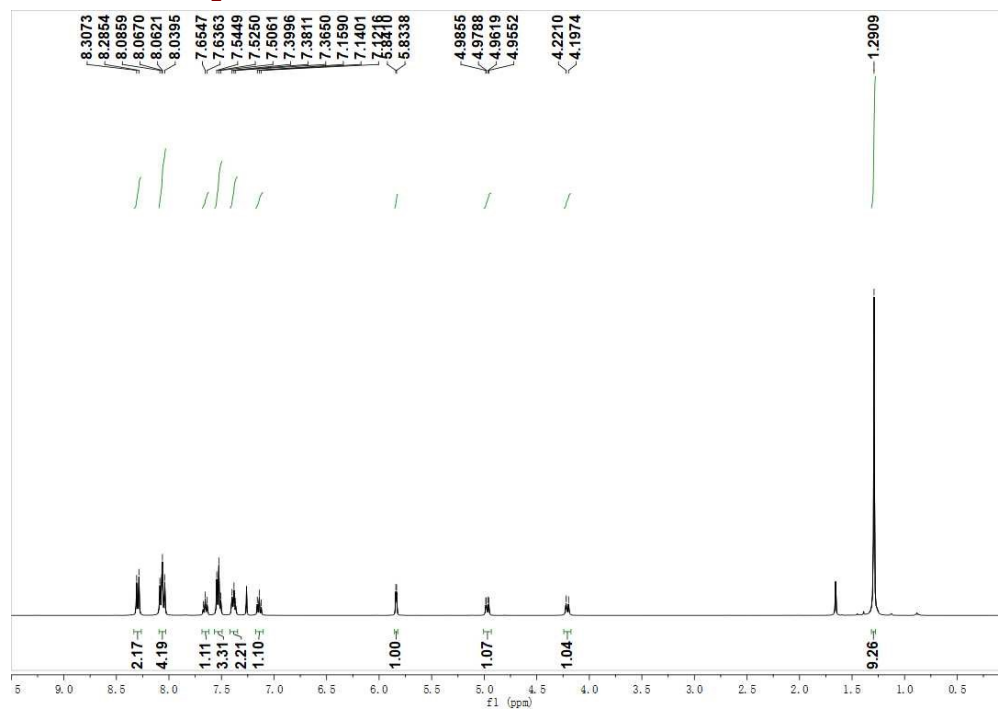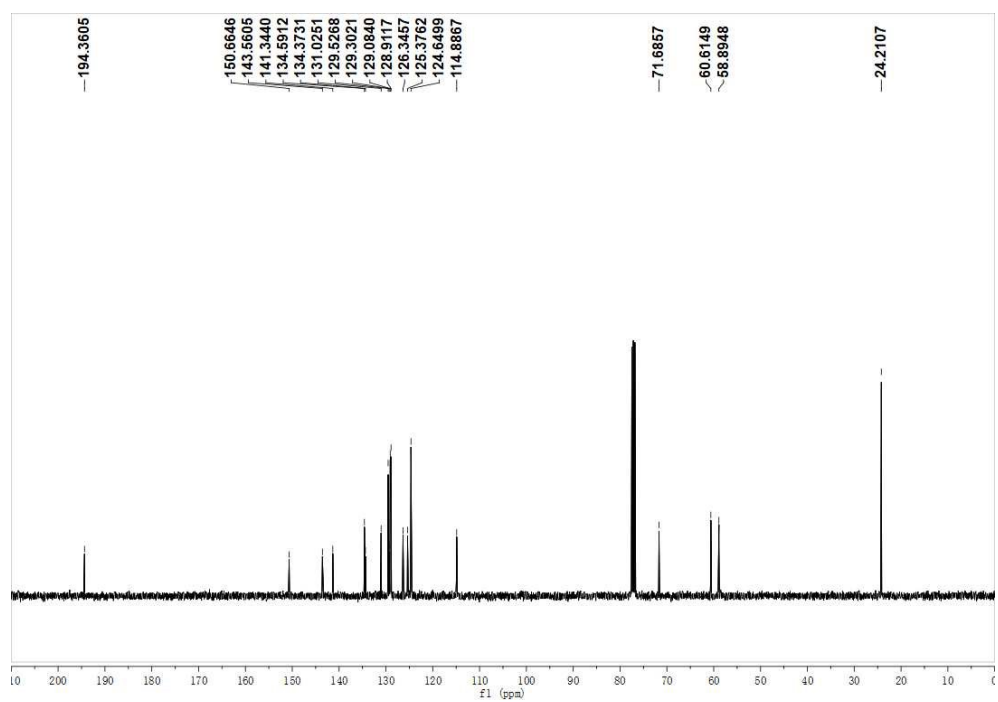

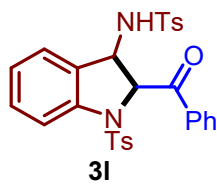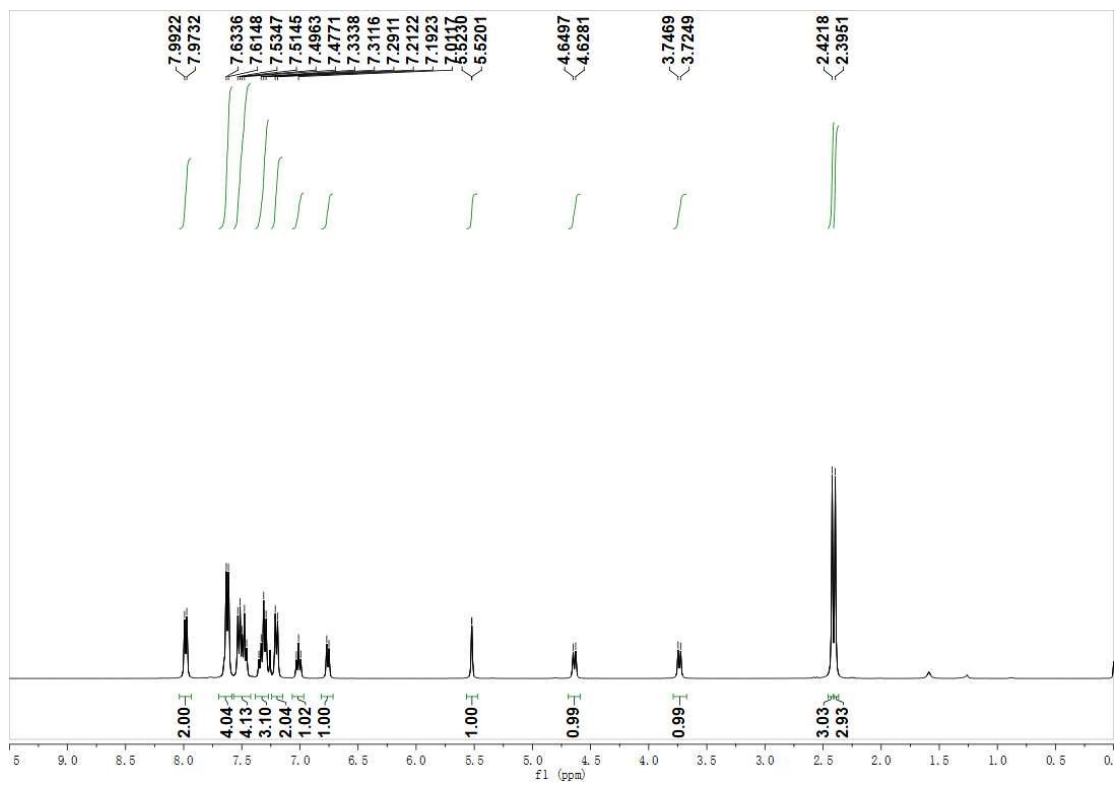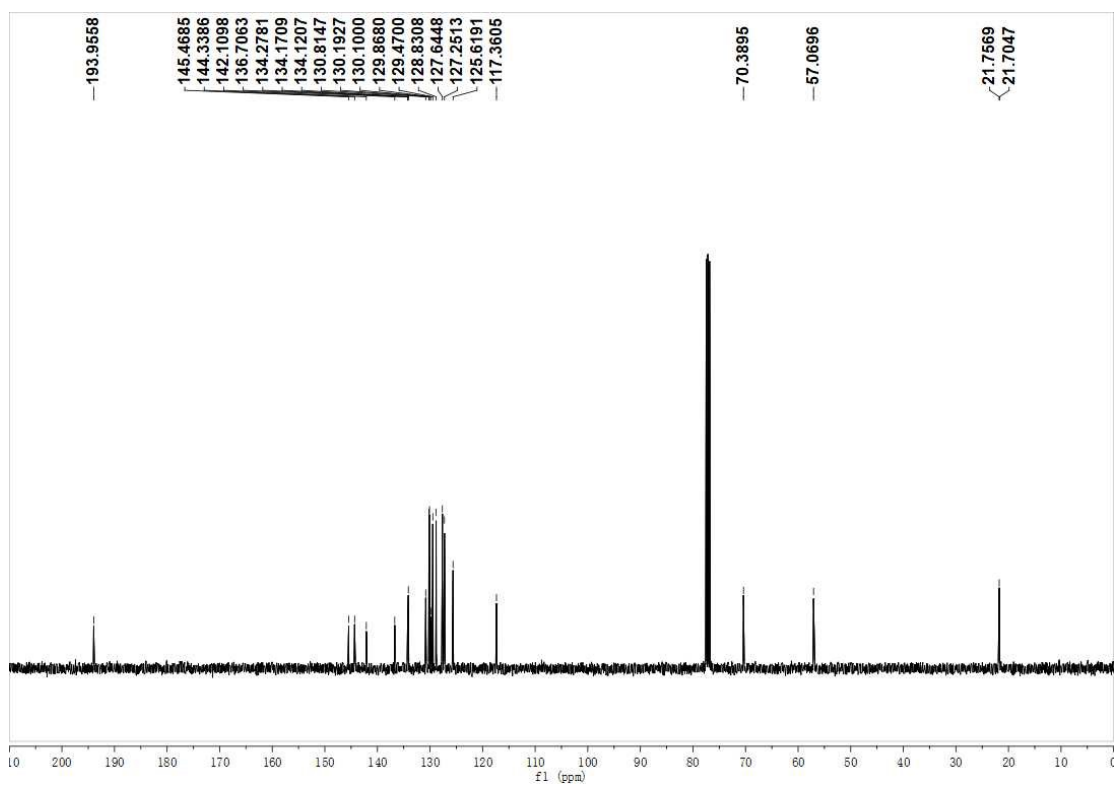

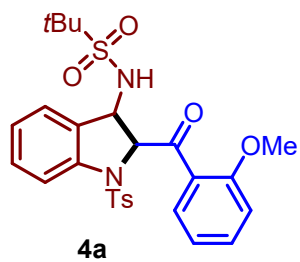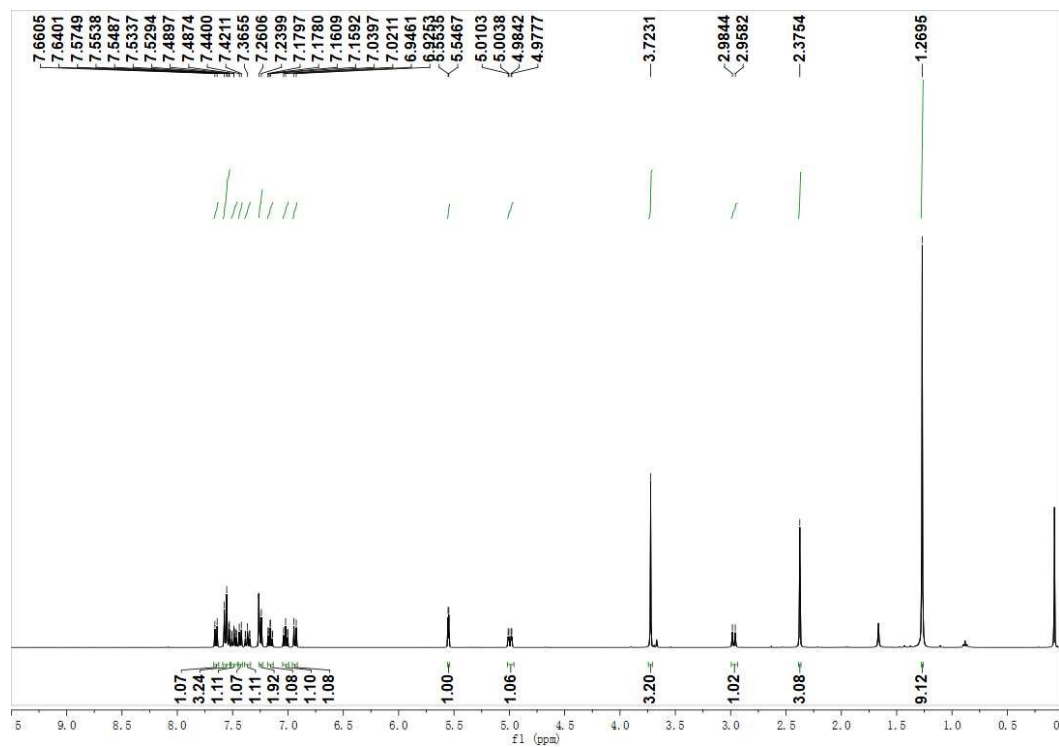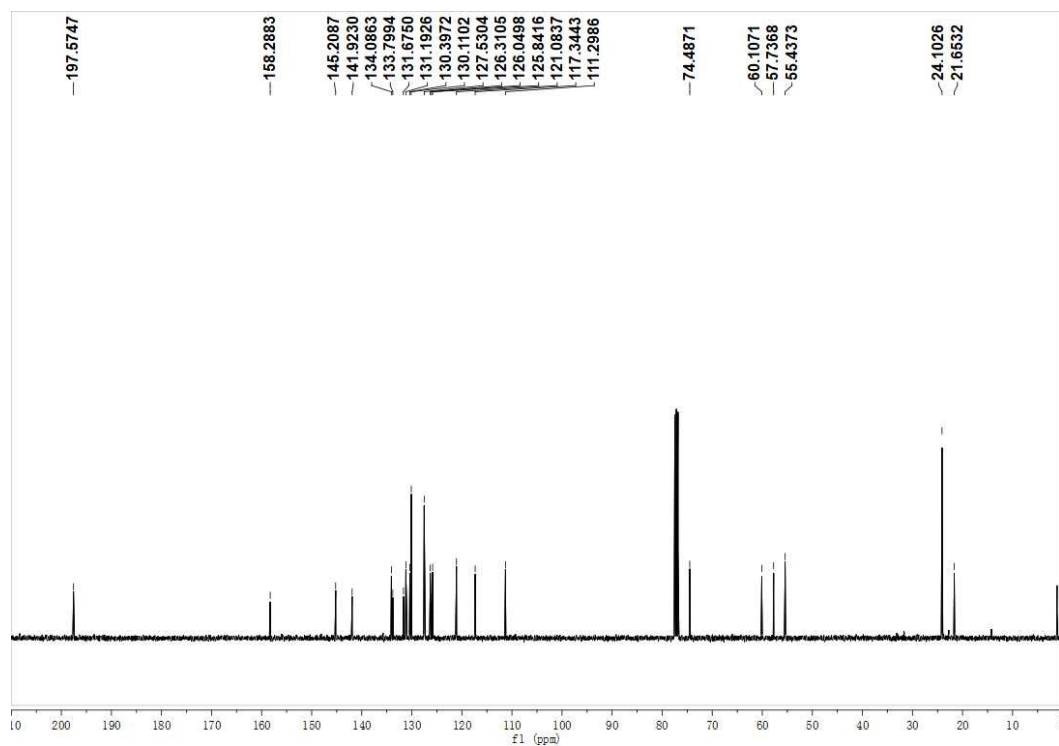

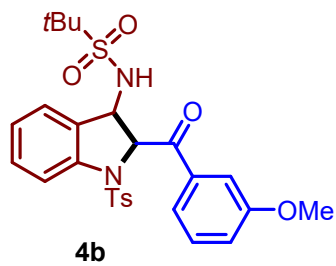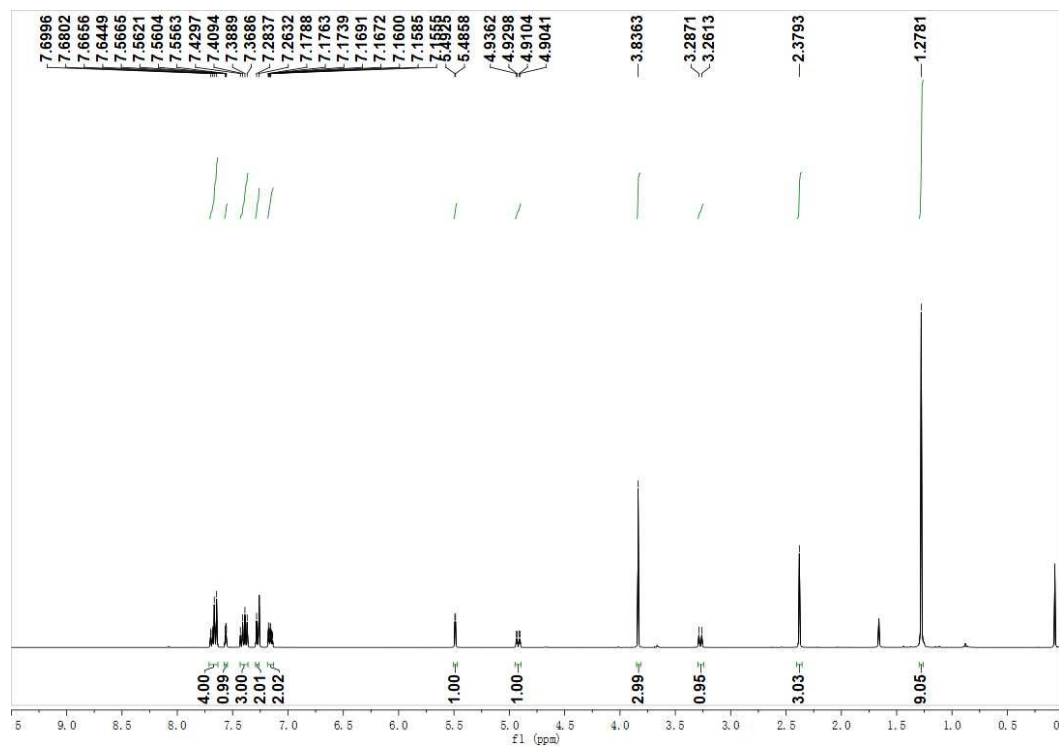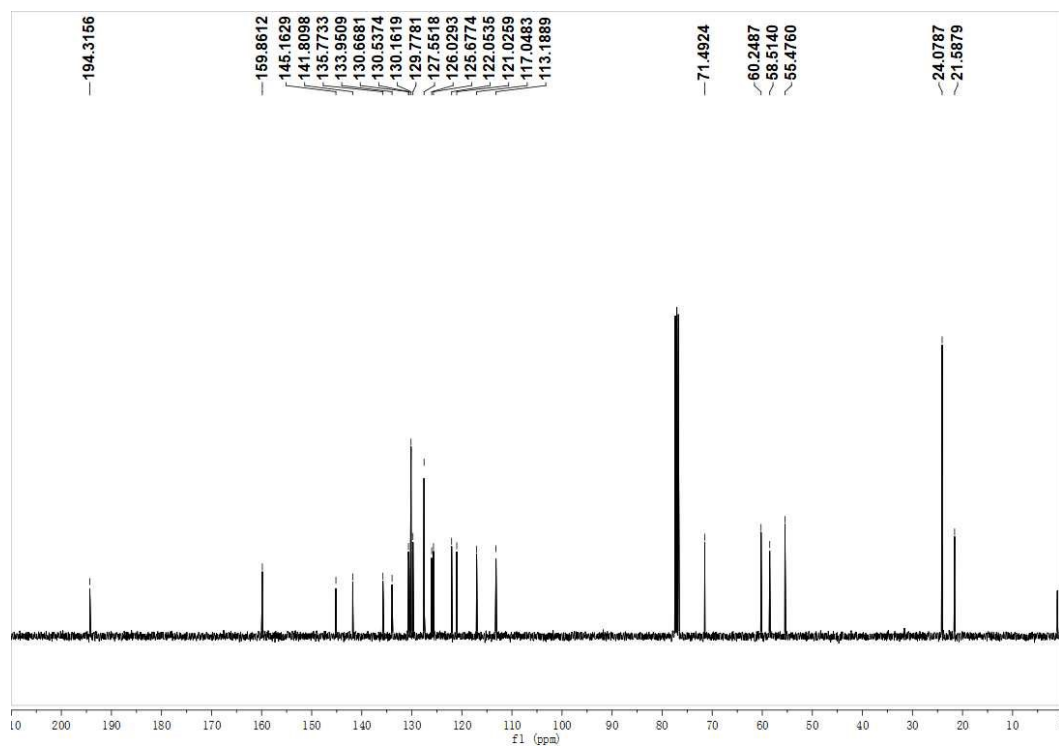

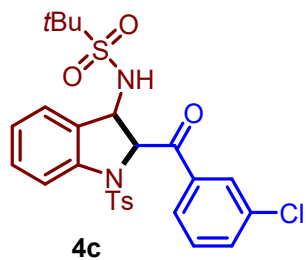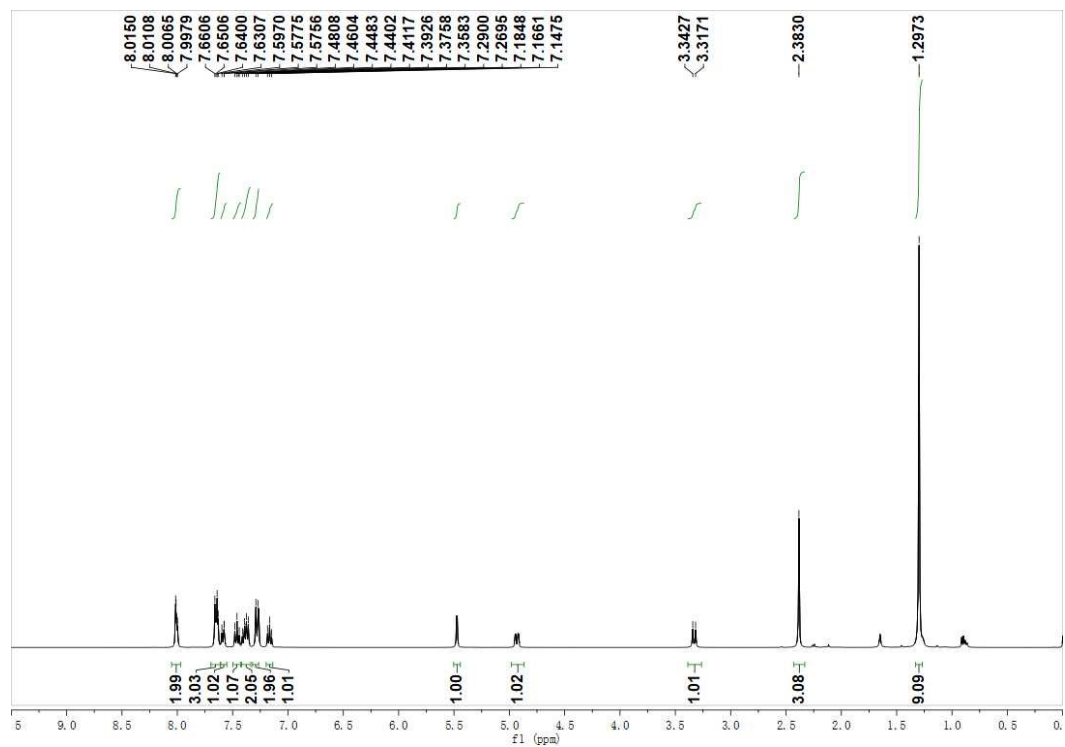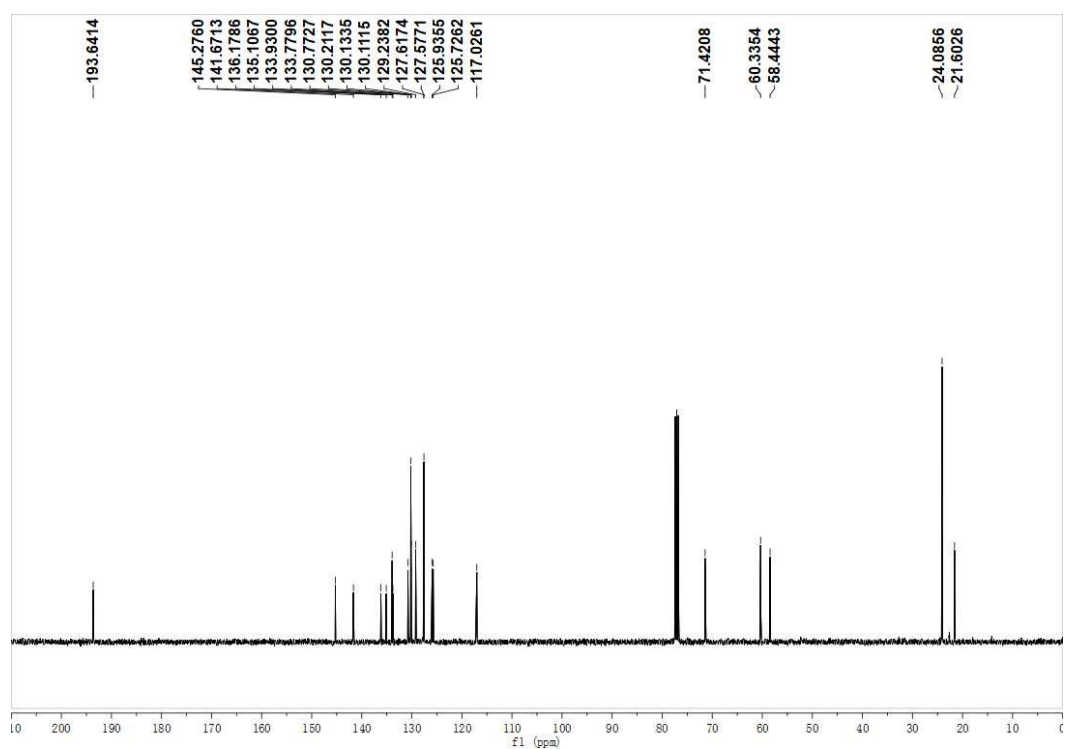

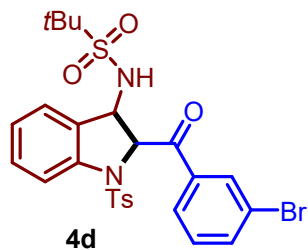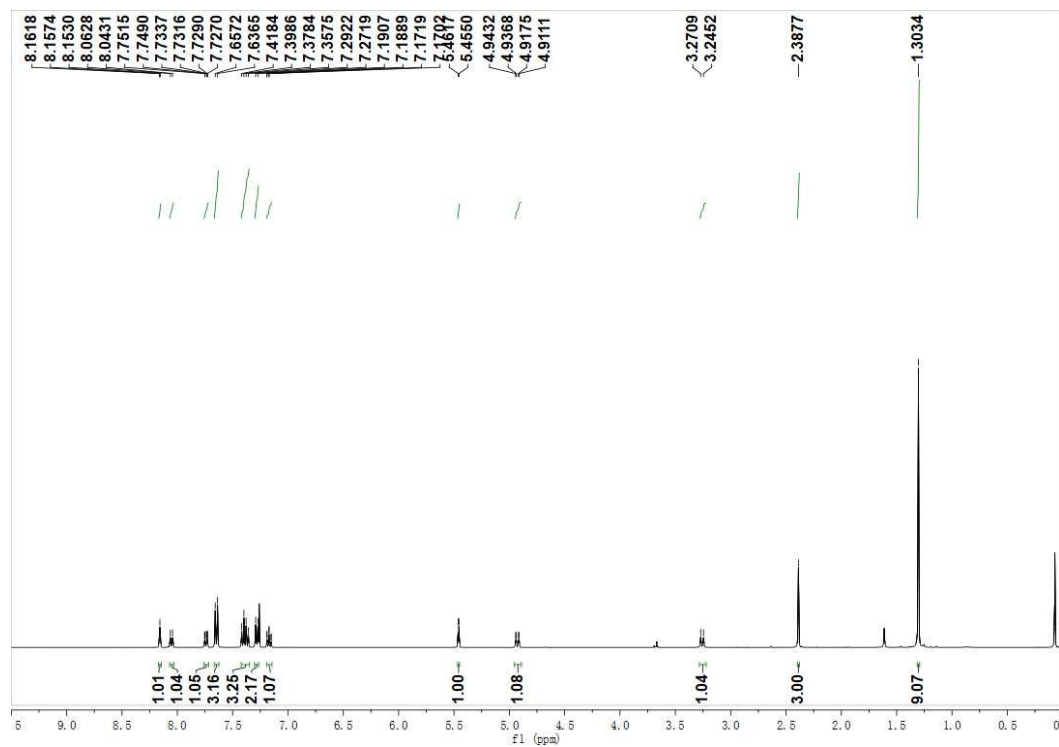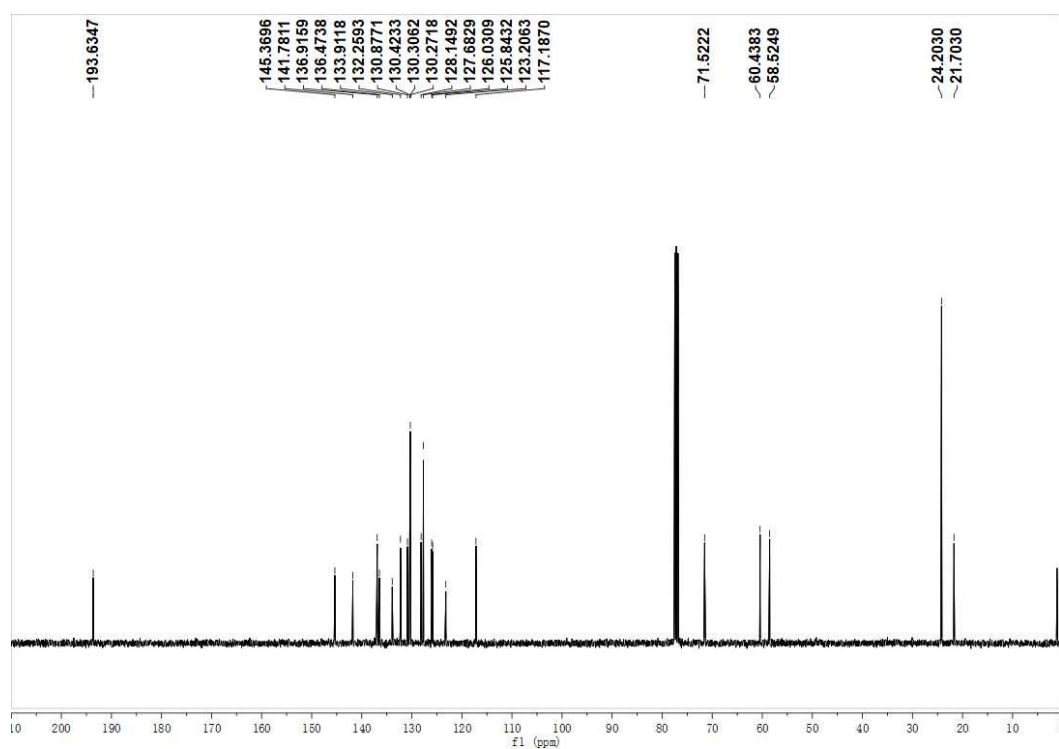

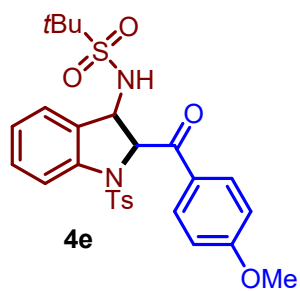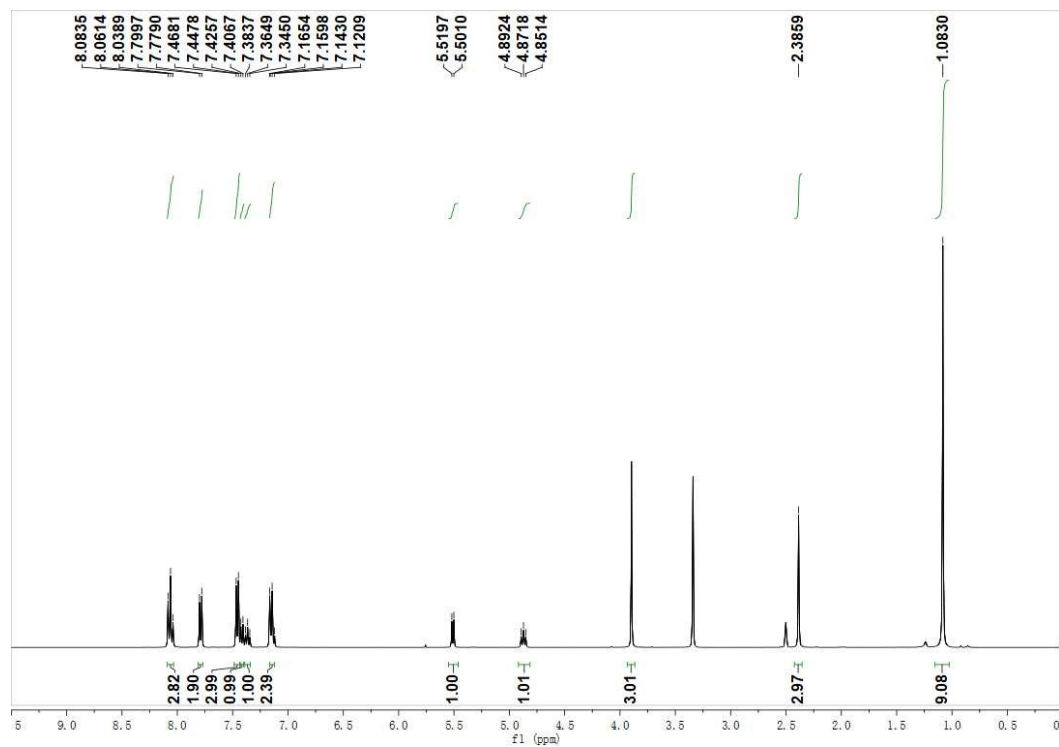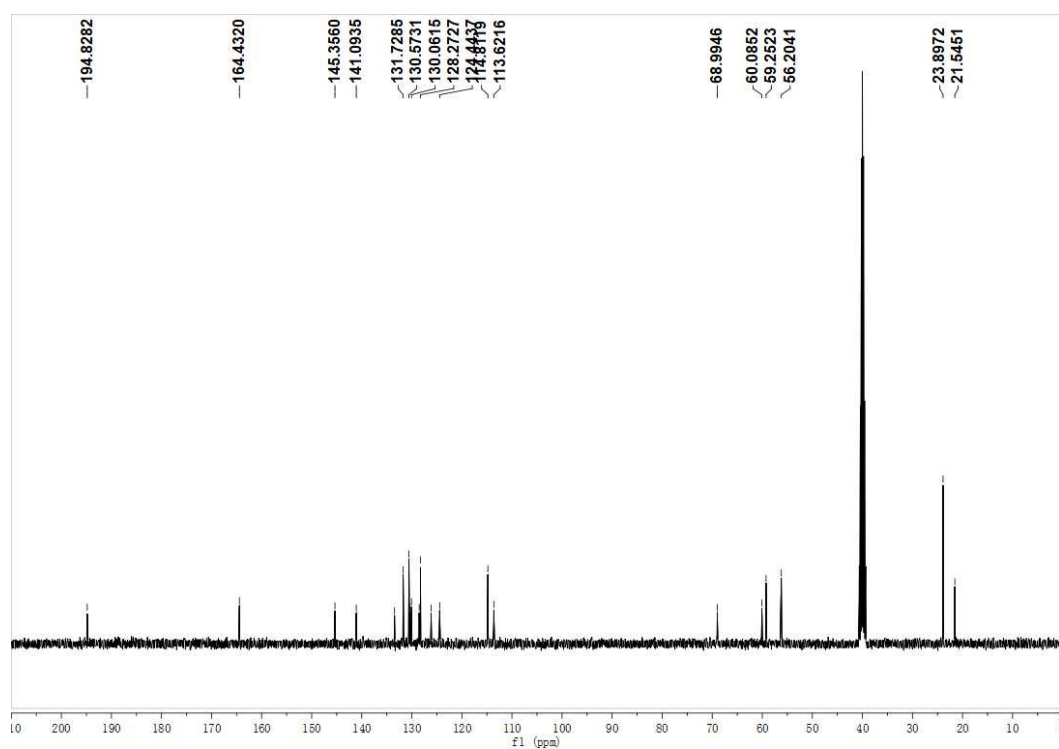

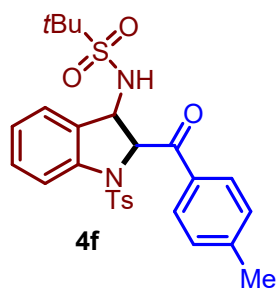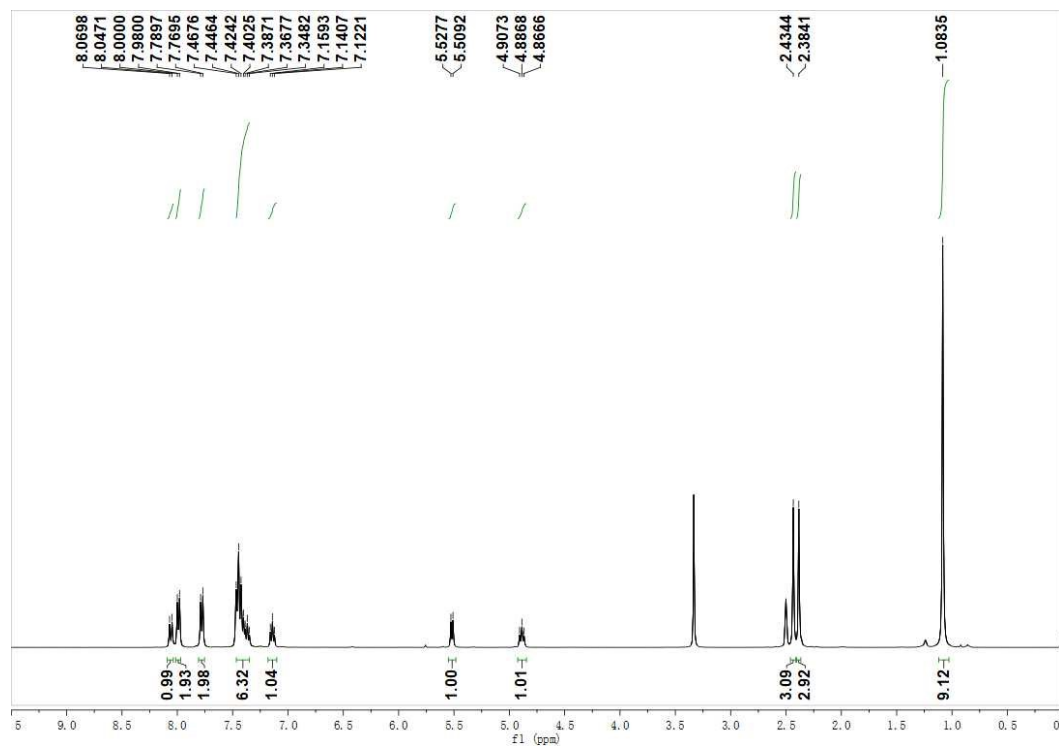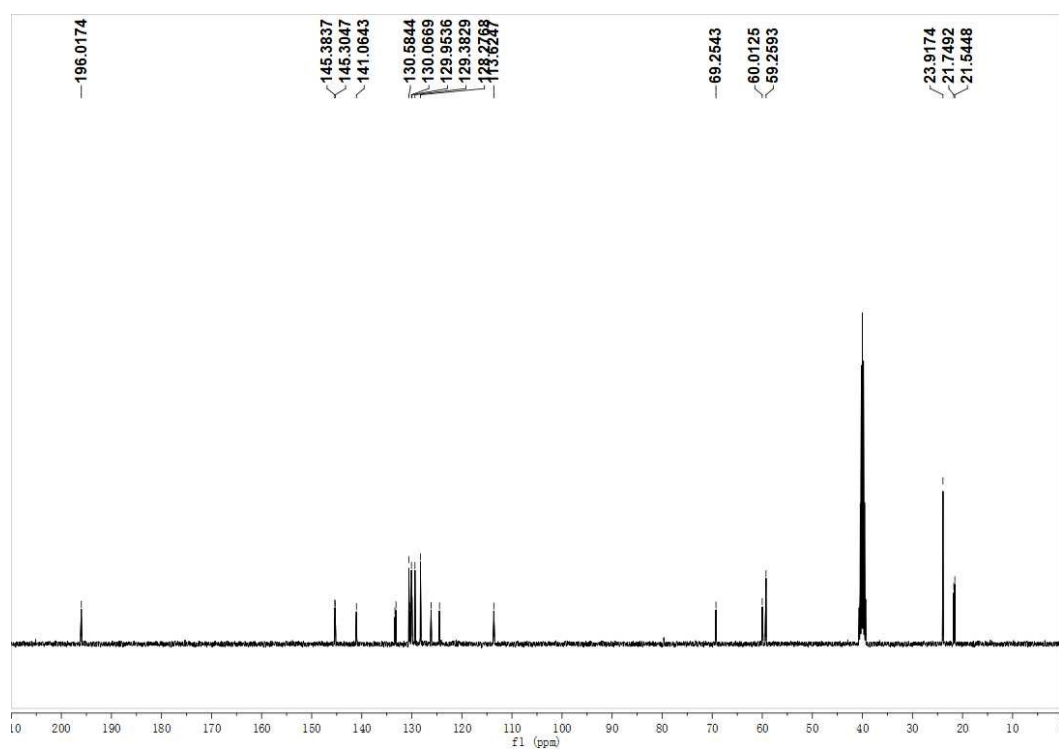



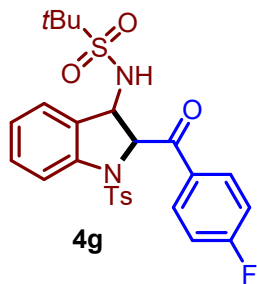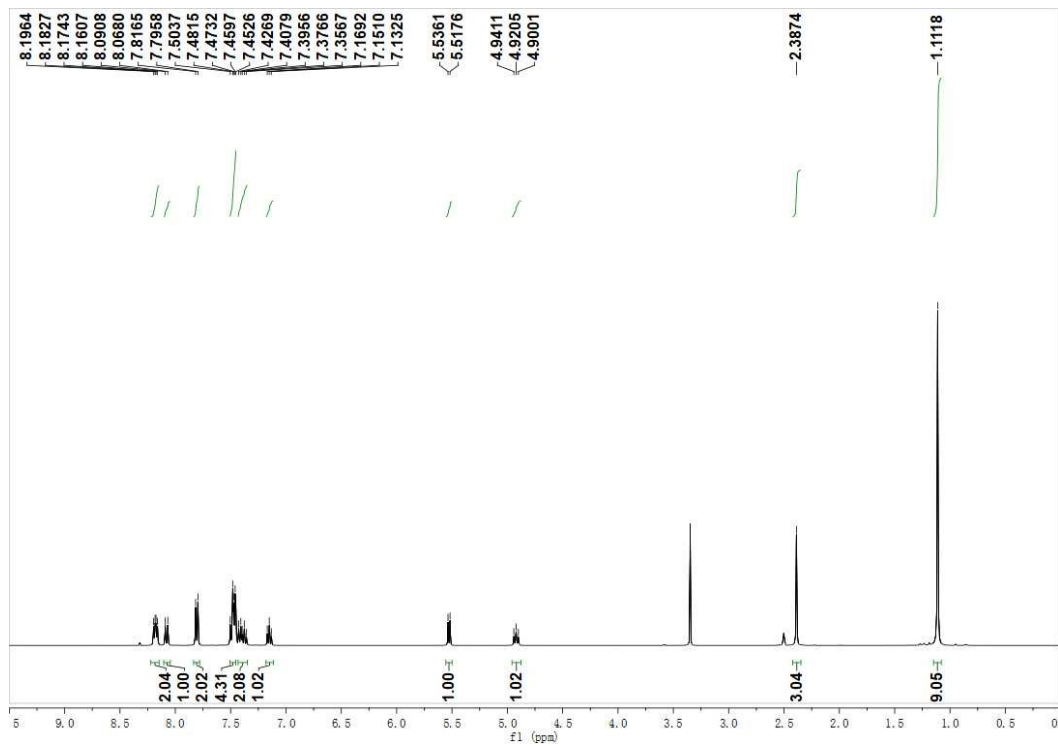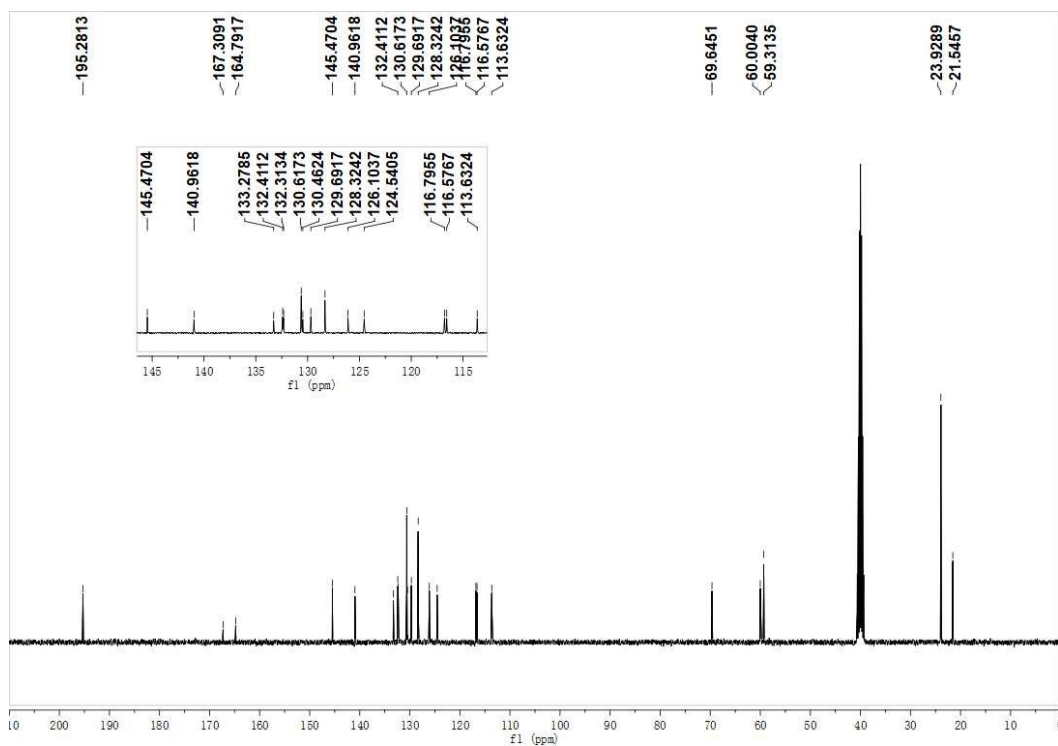

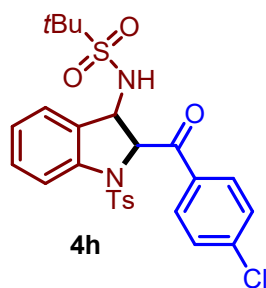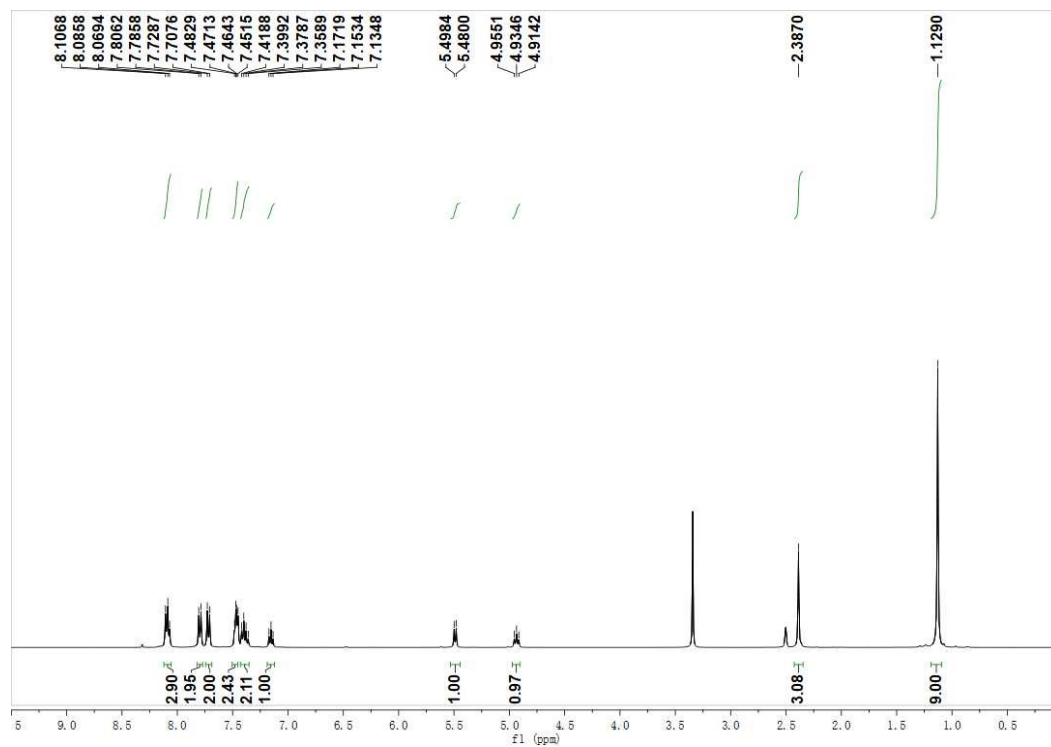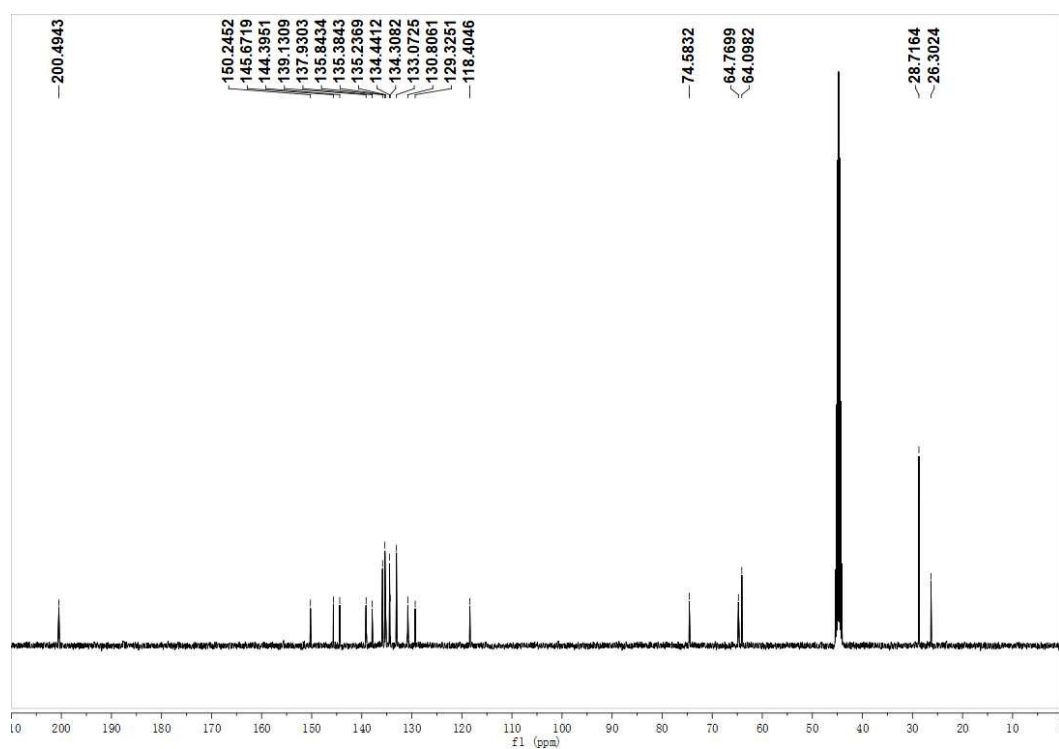

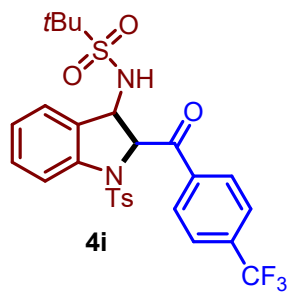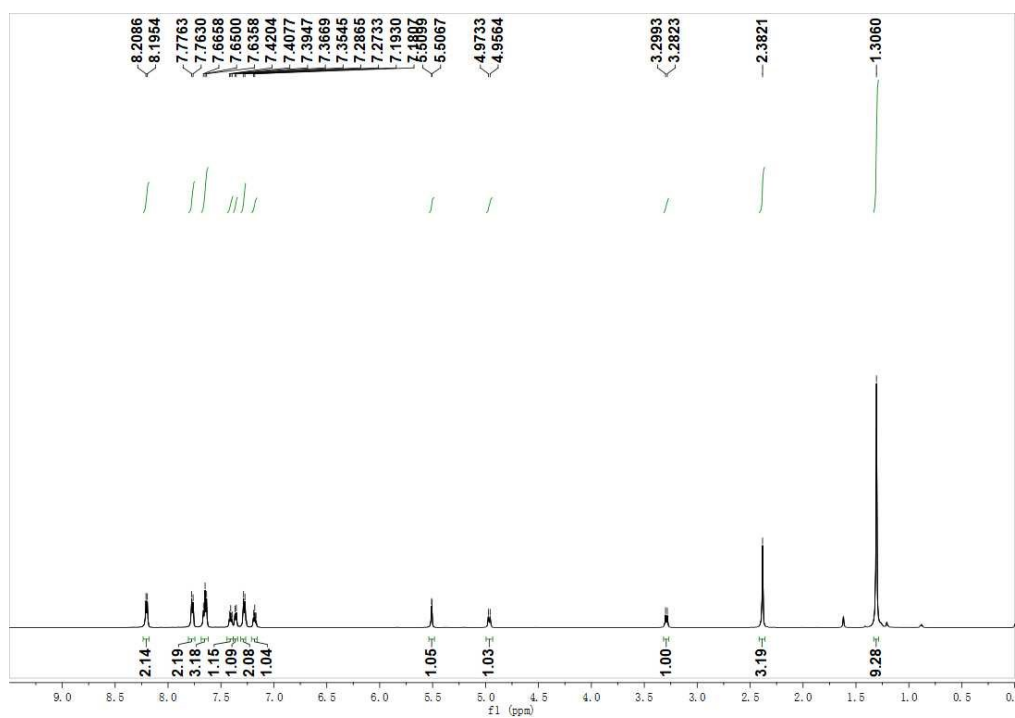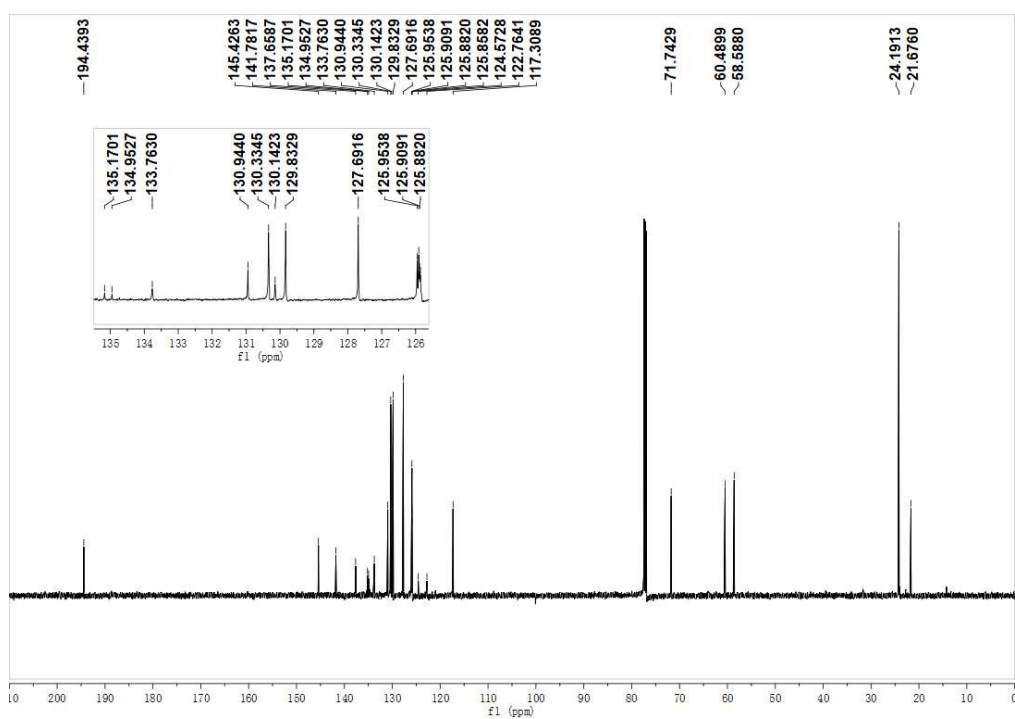

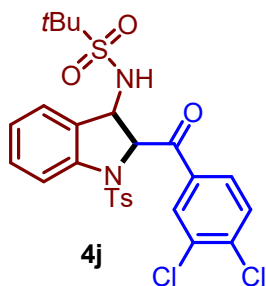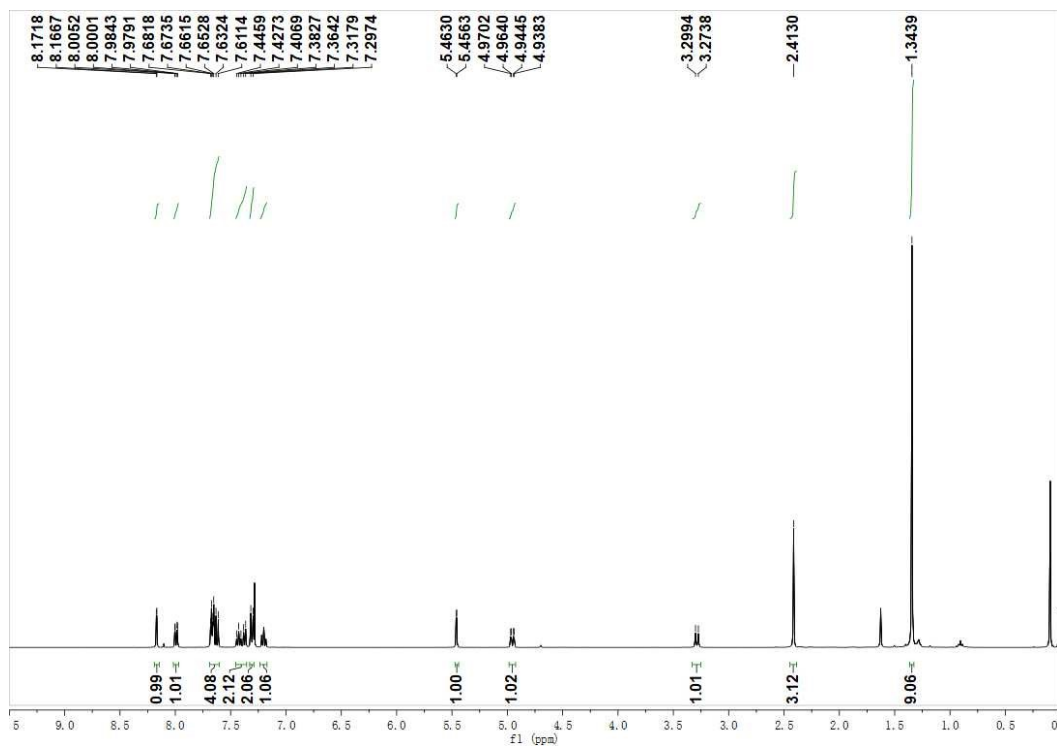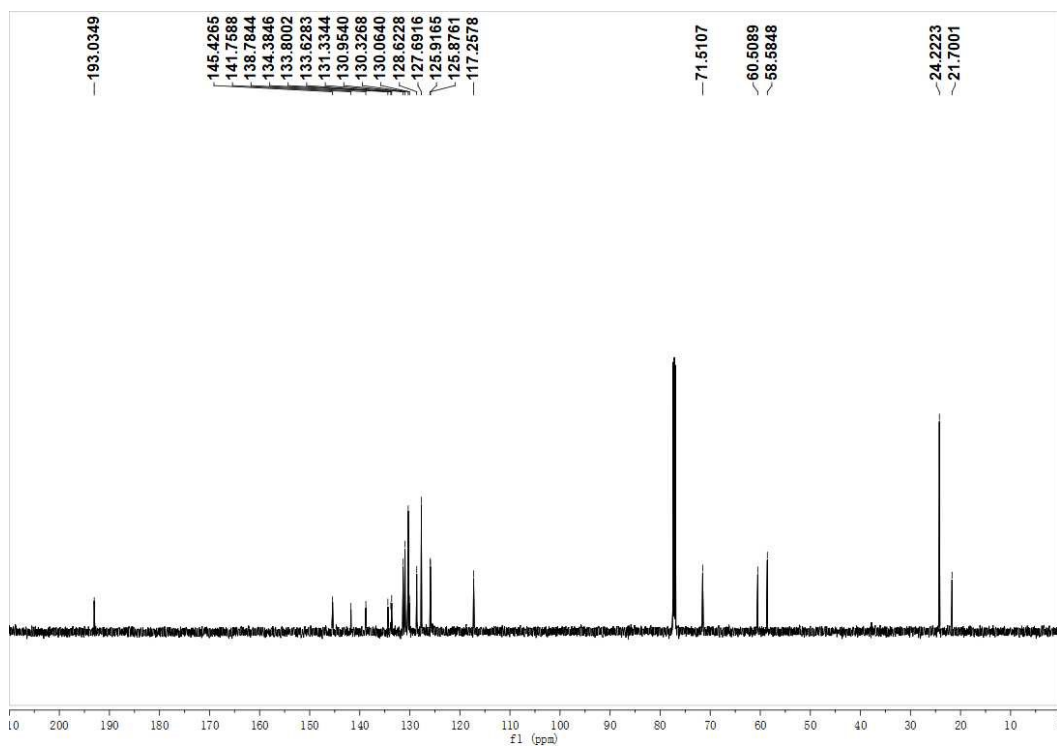

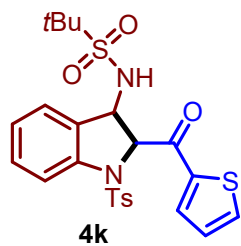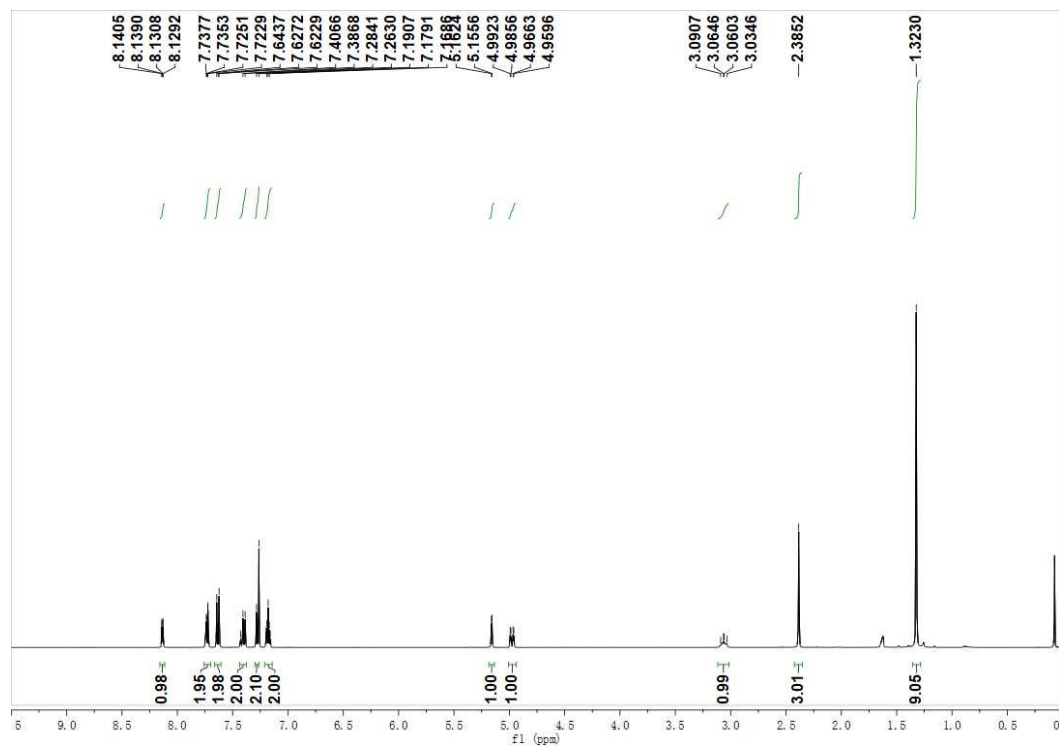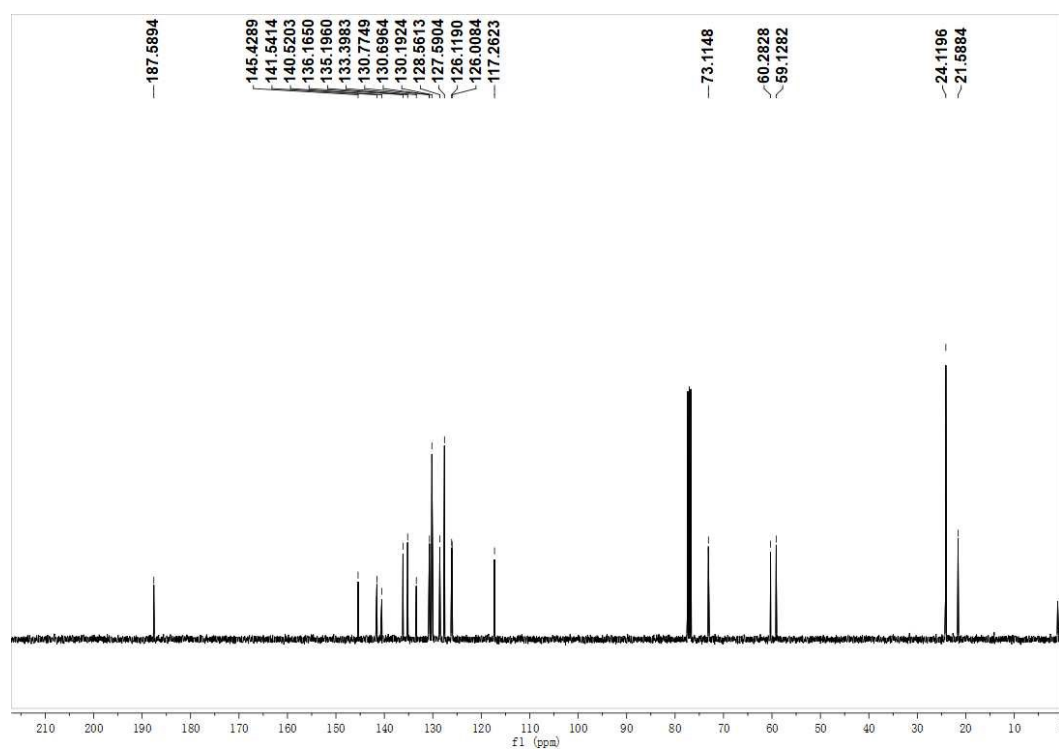

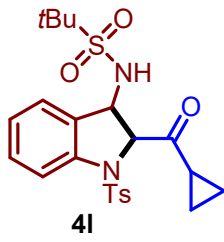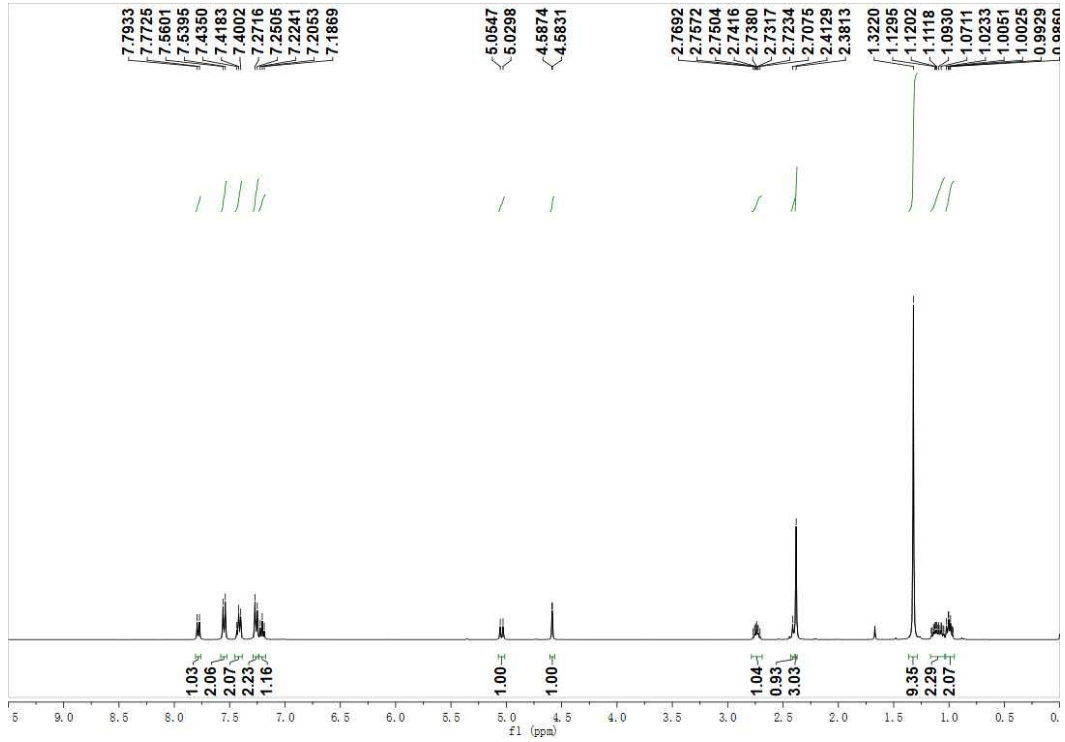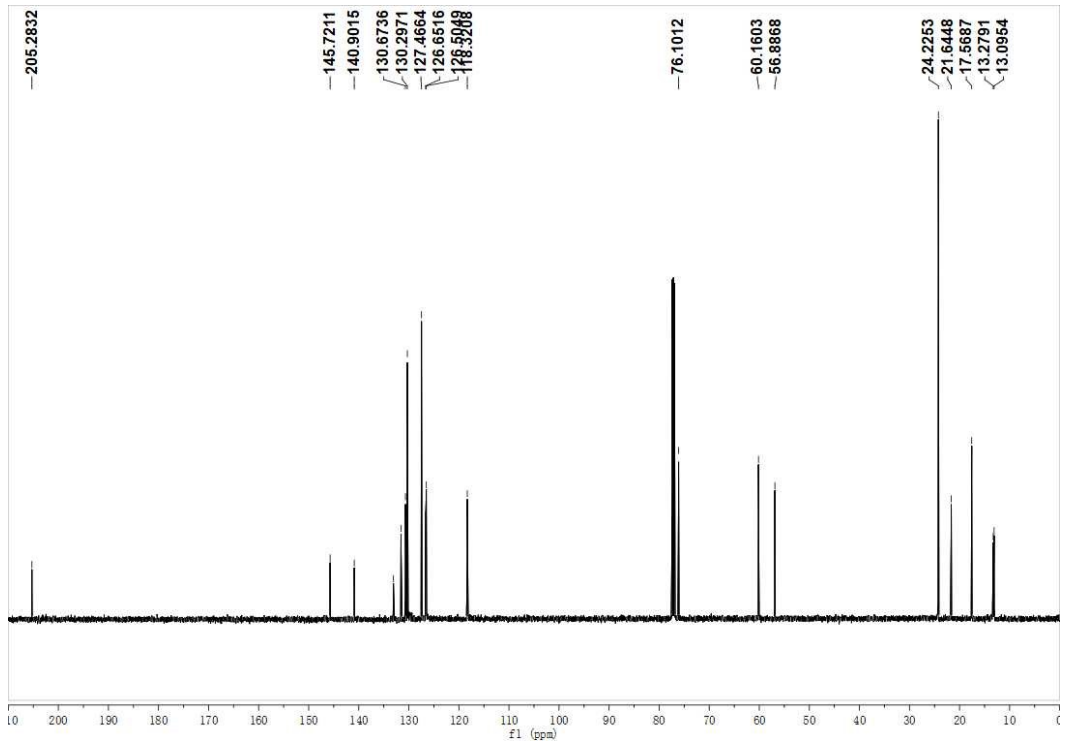

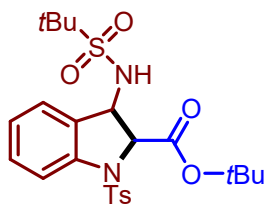

4m

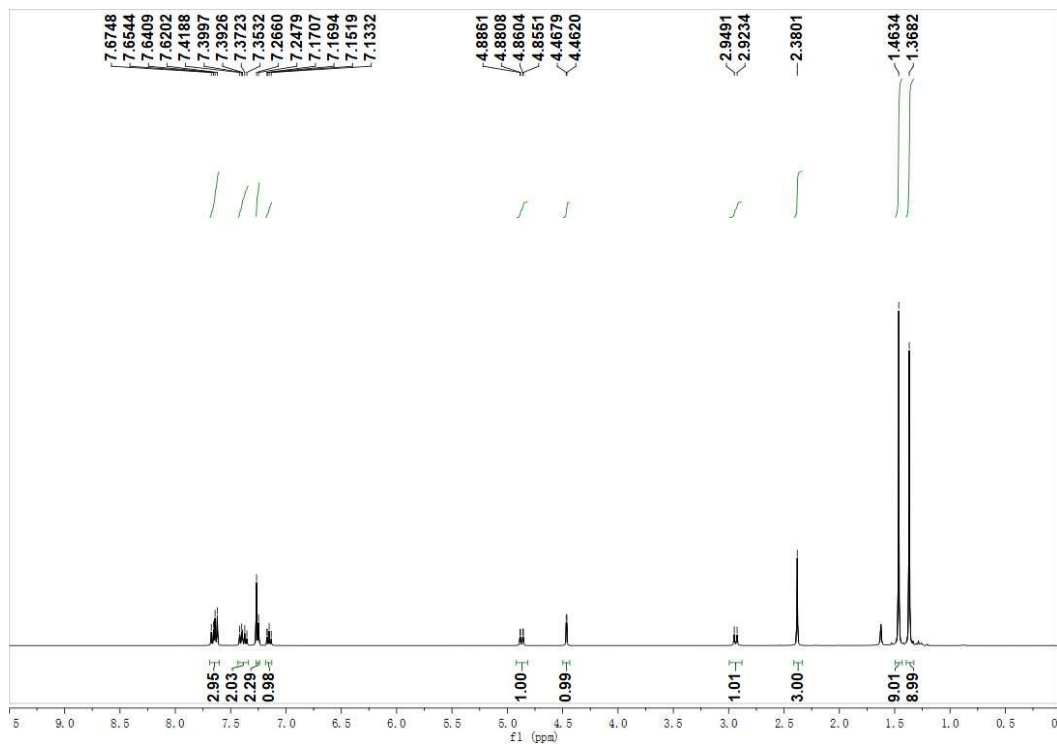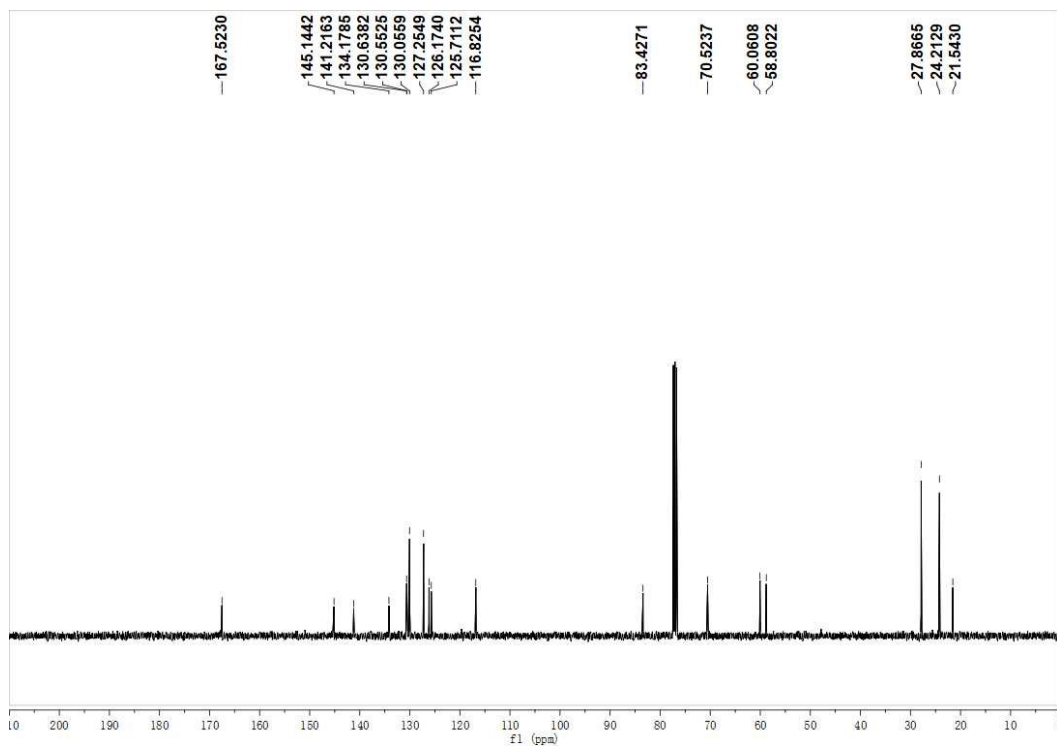

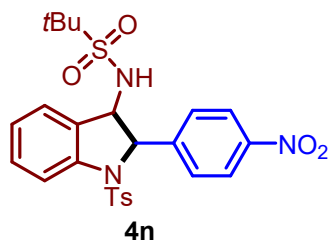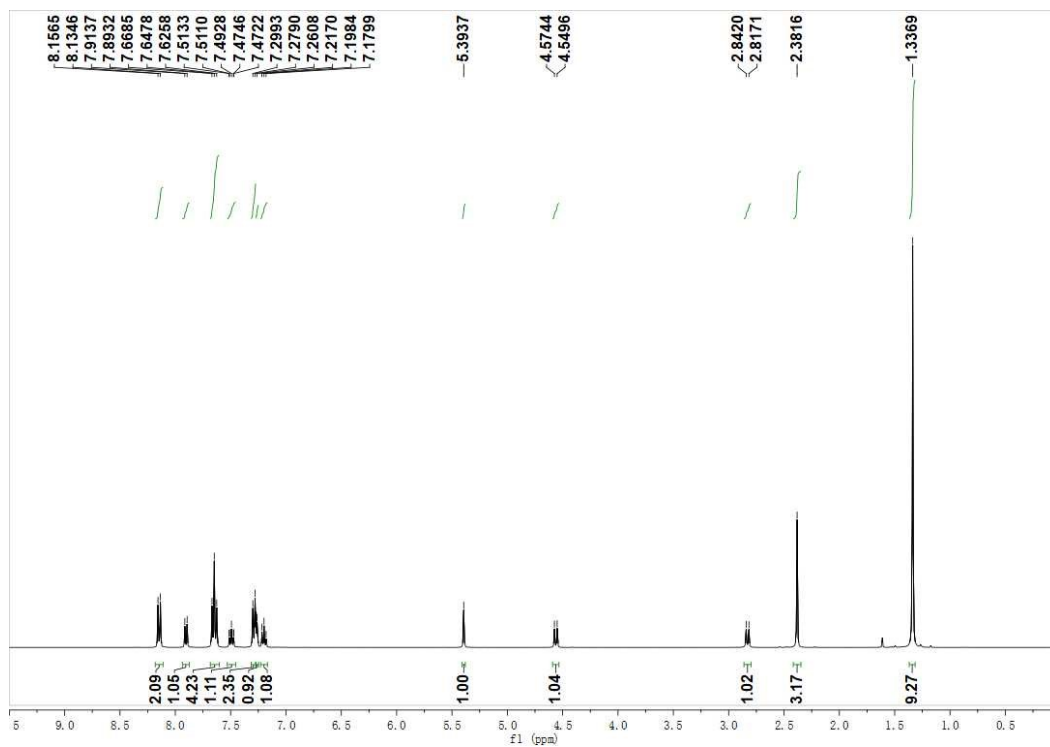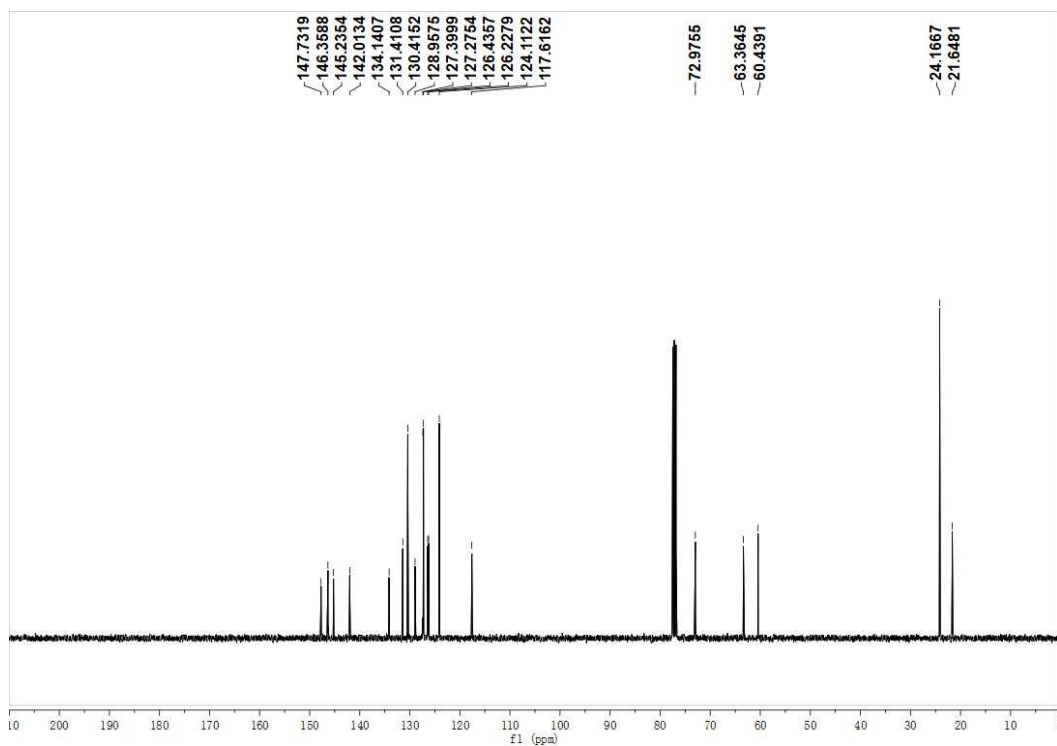



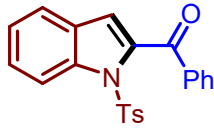

5a

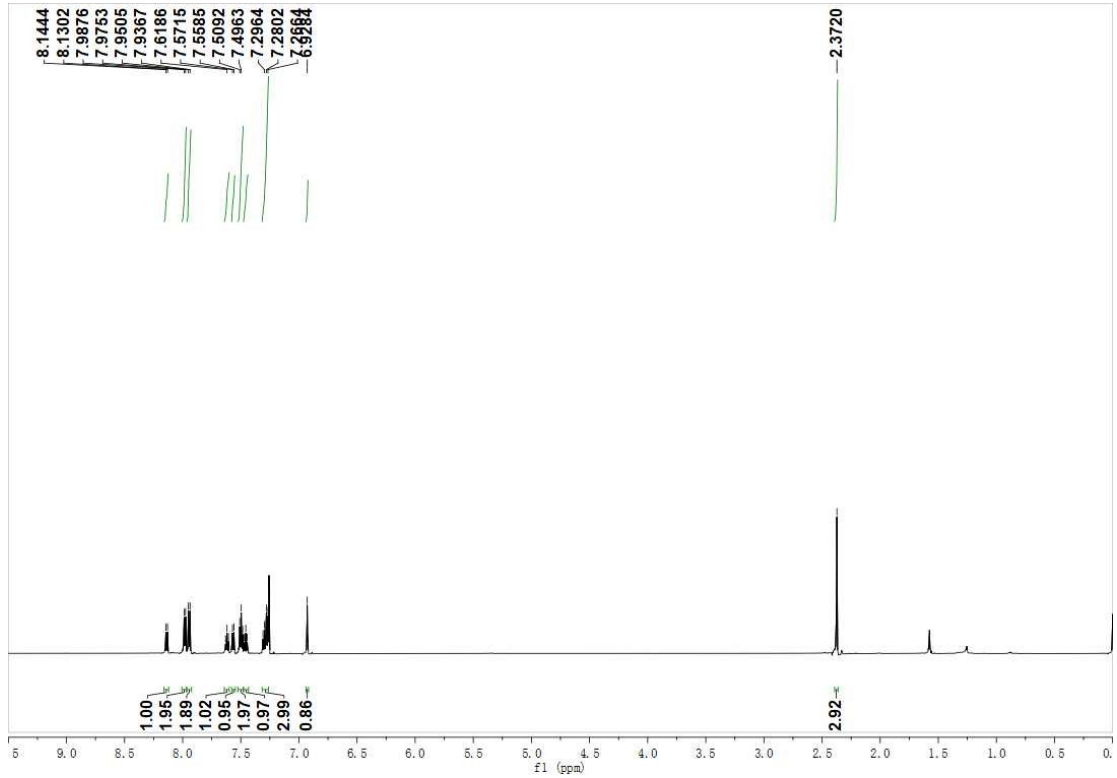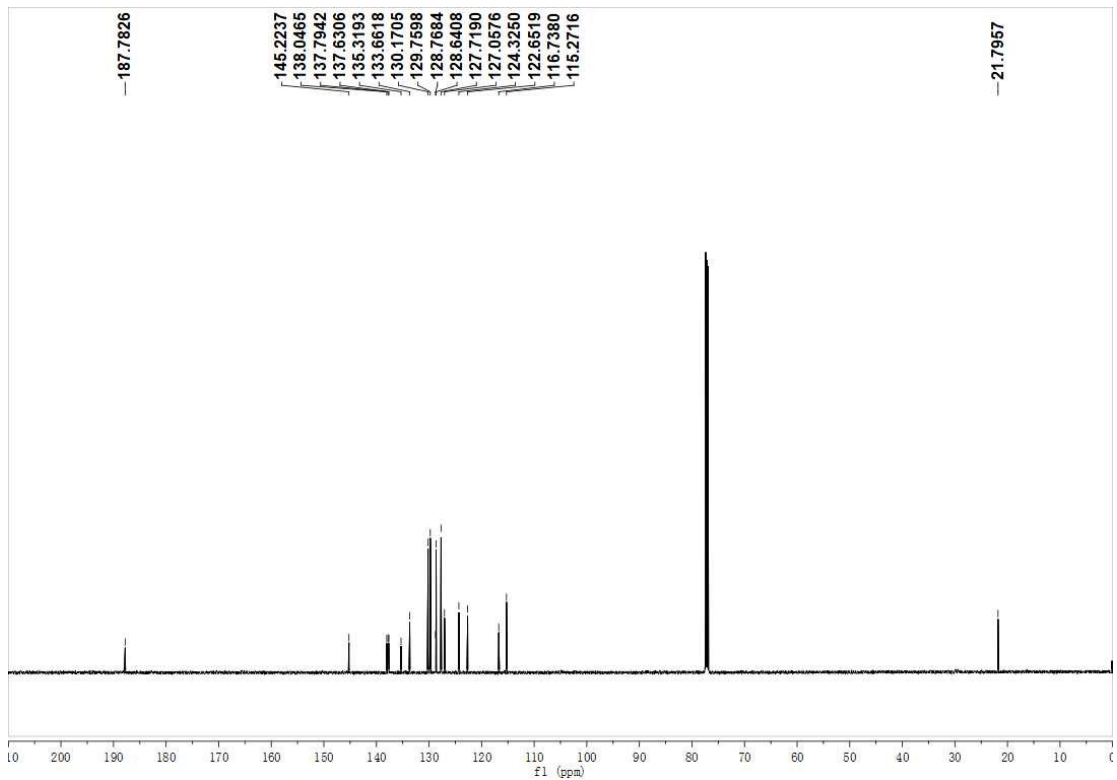

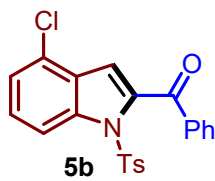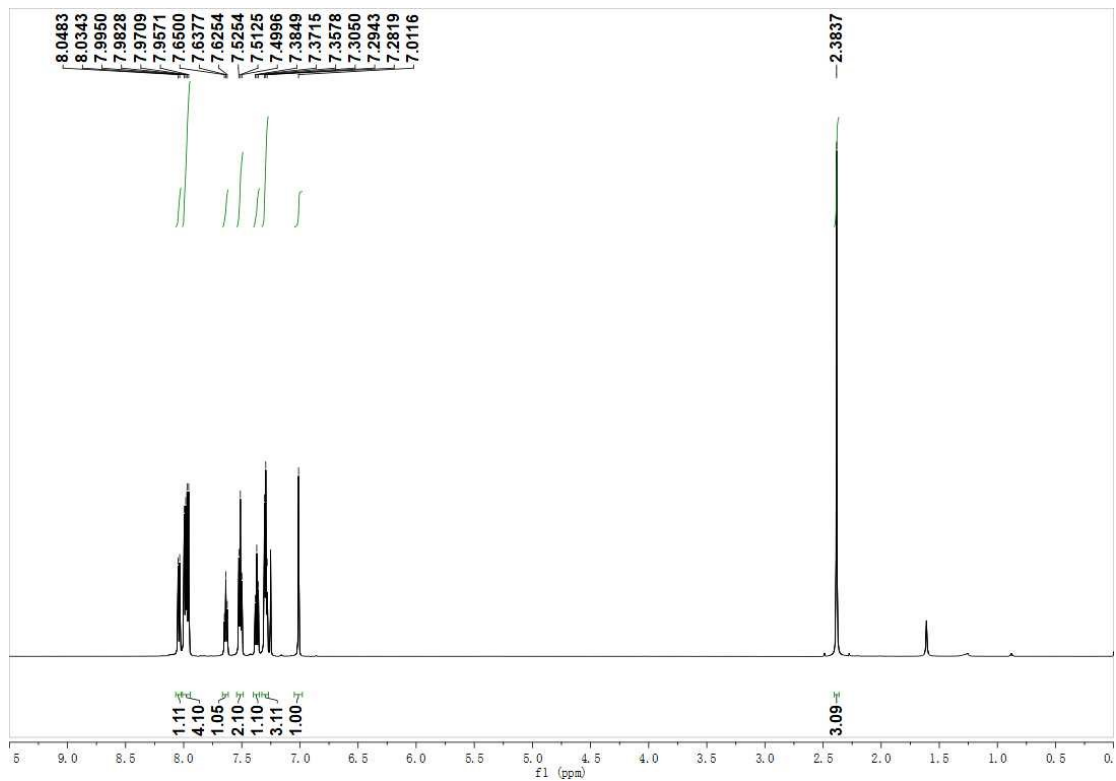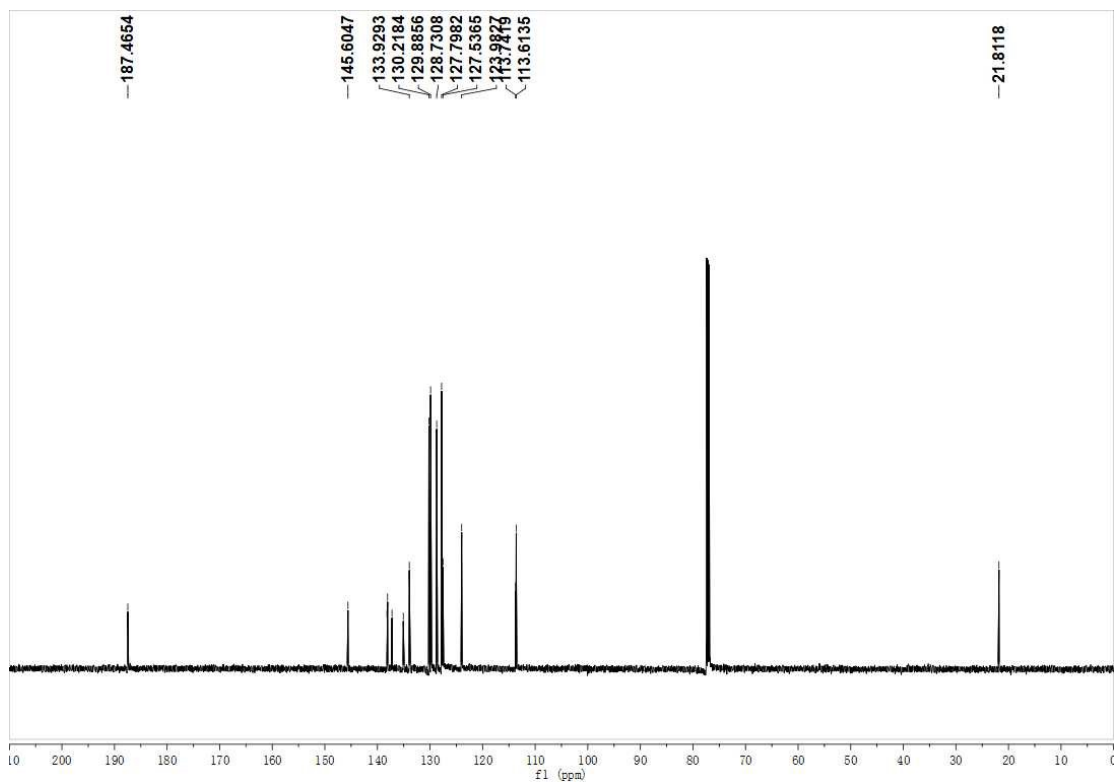

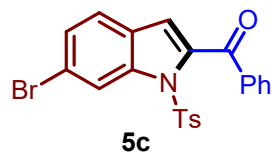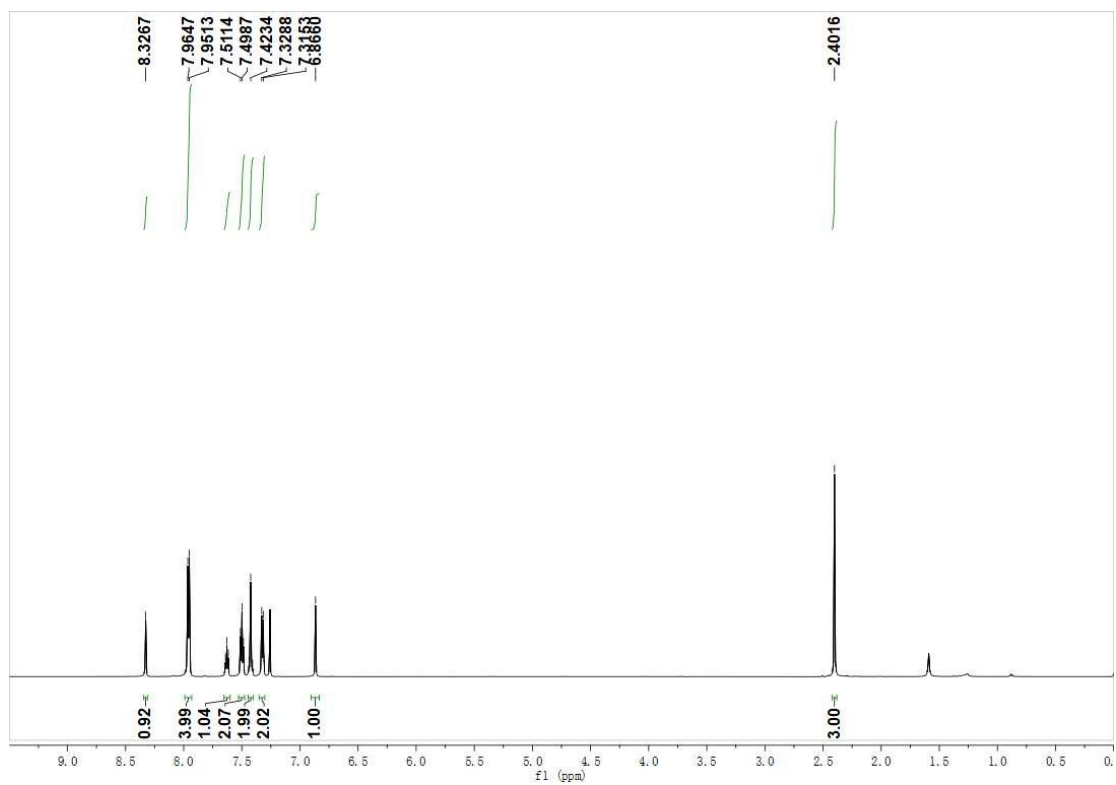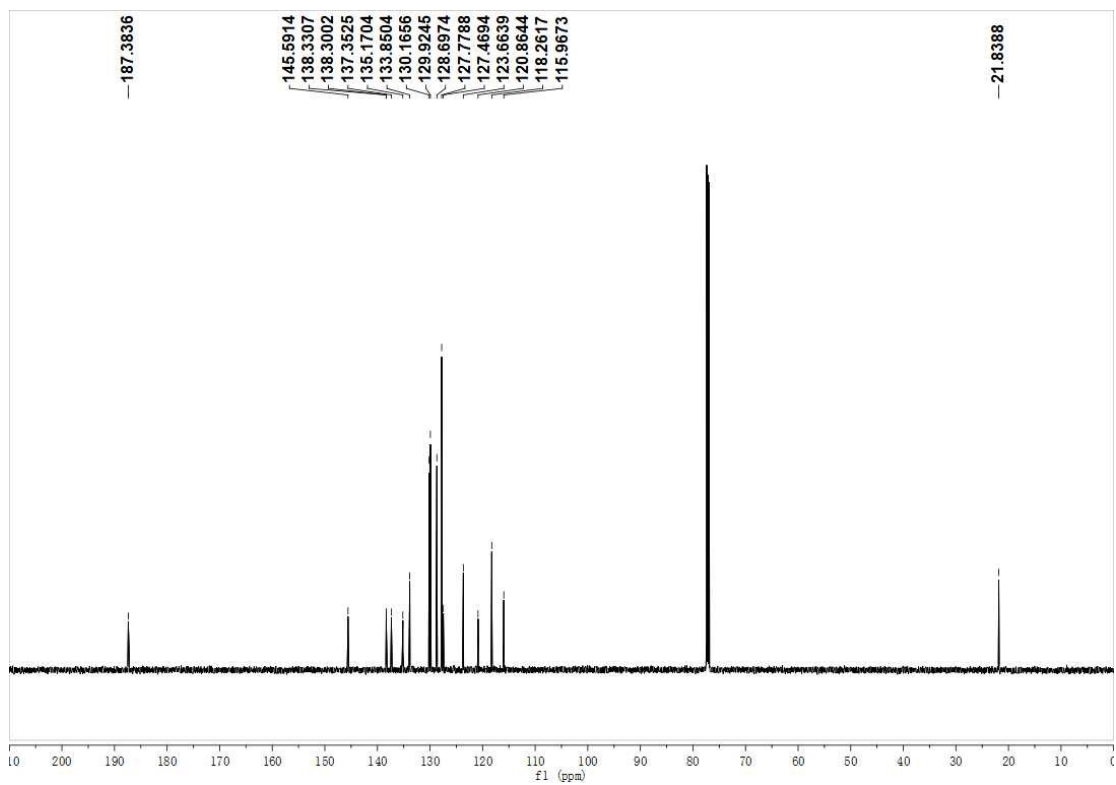

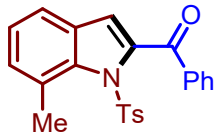

**5d**

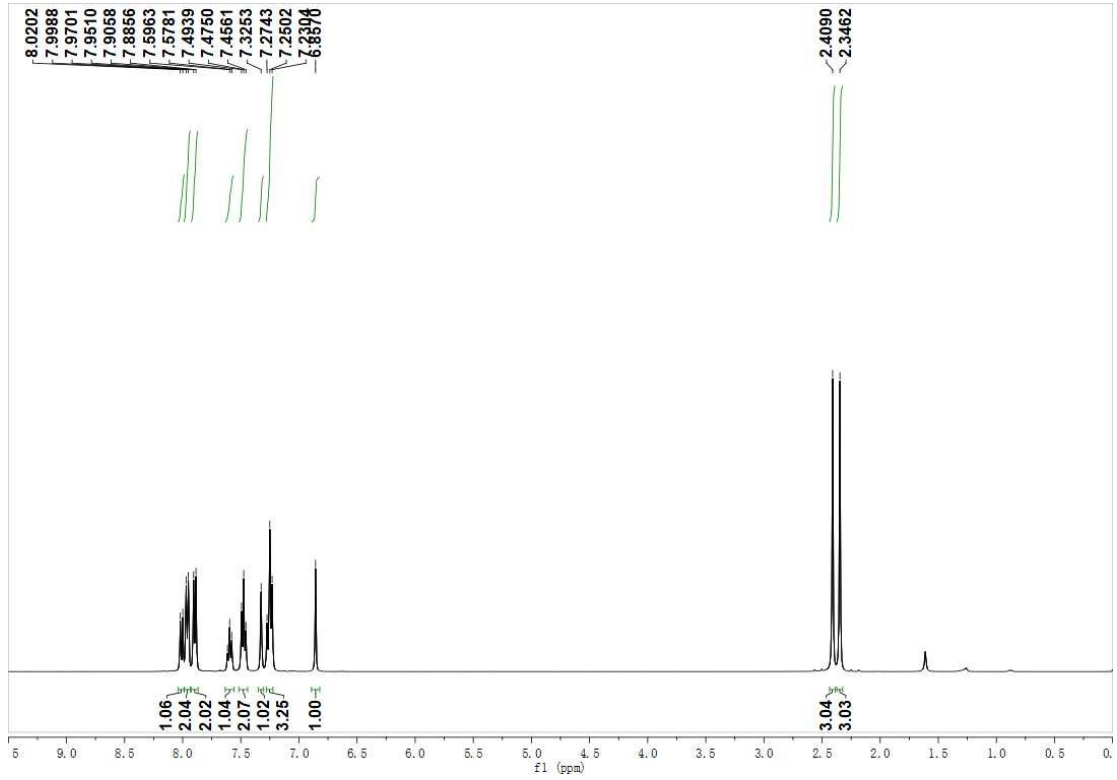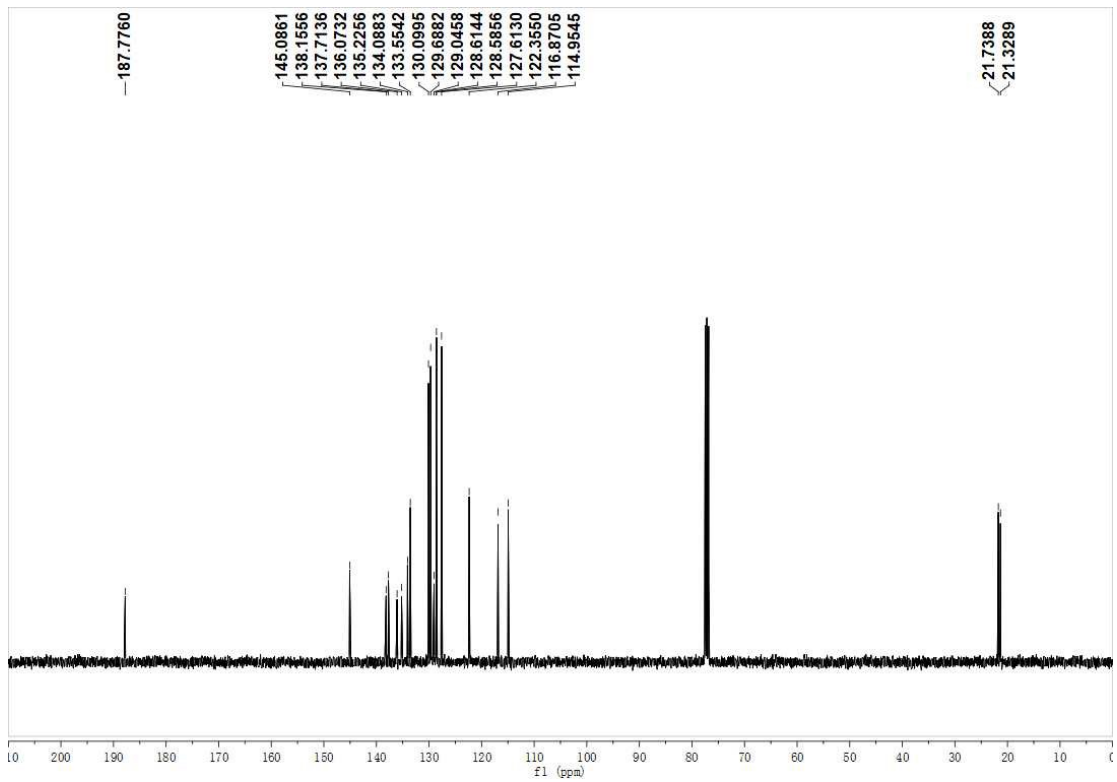

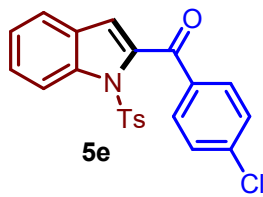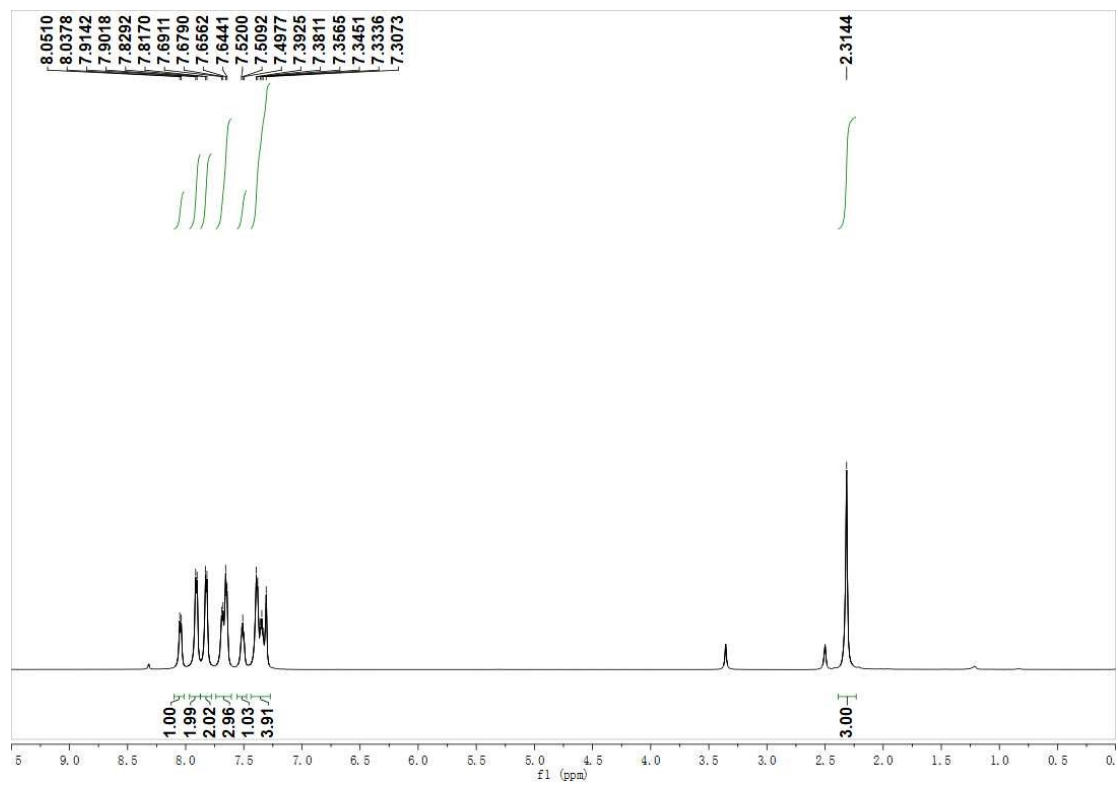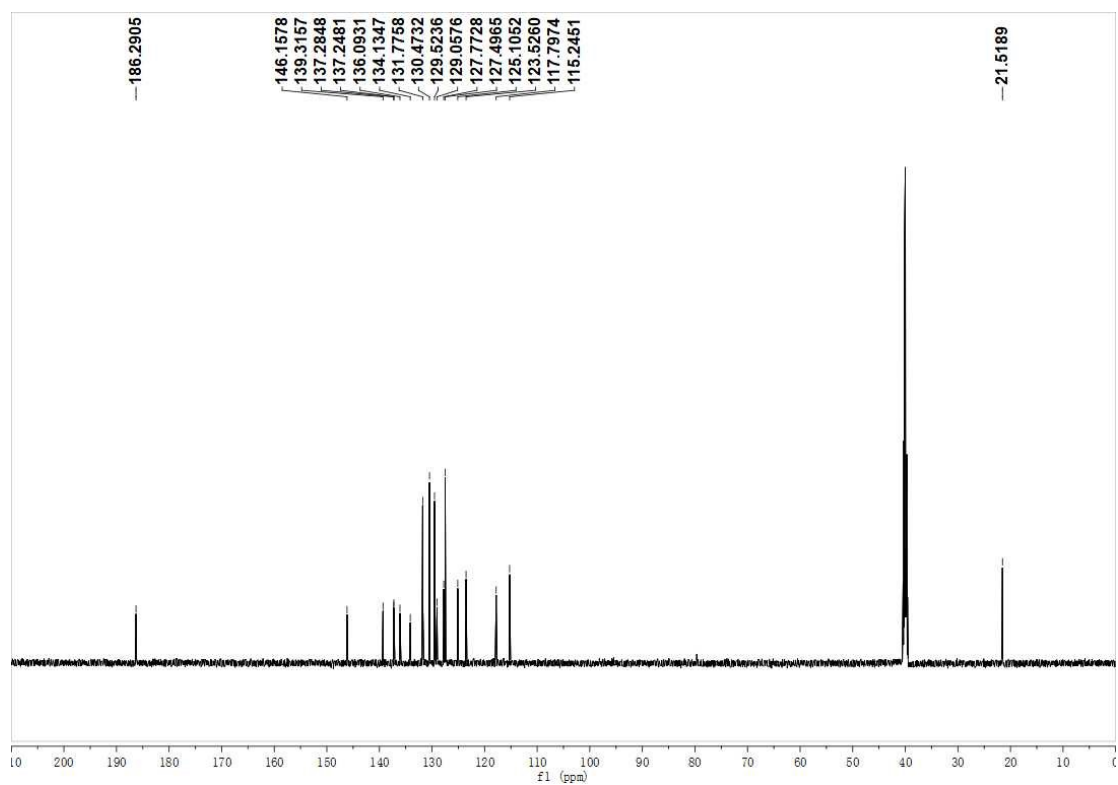

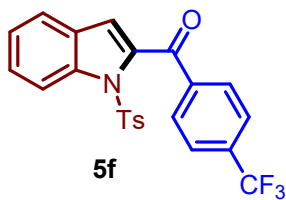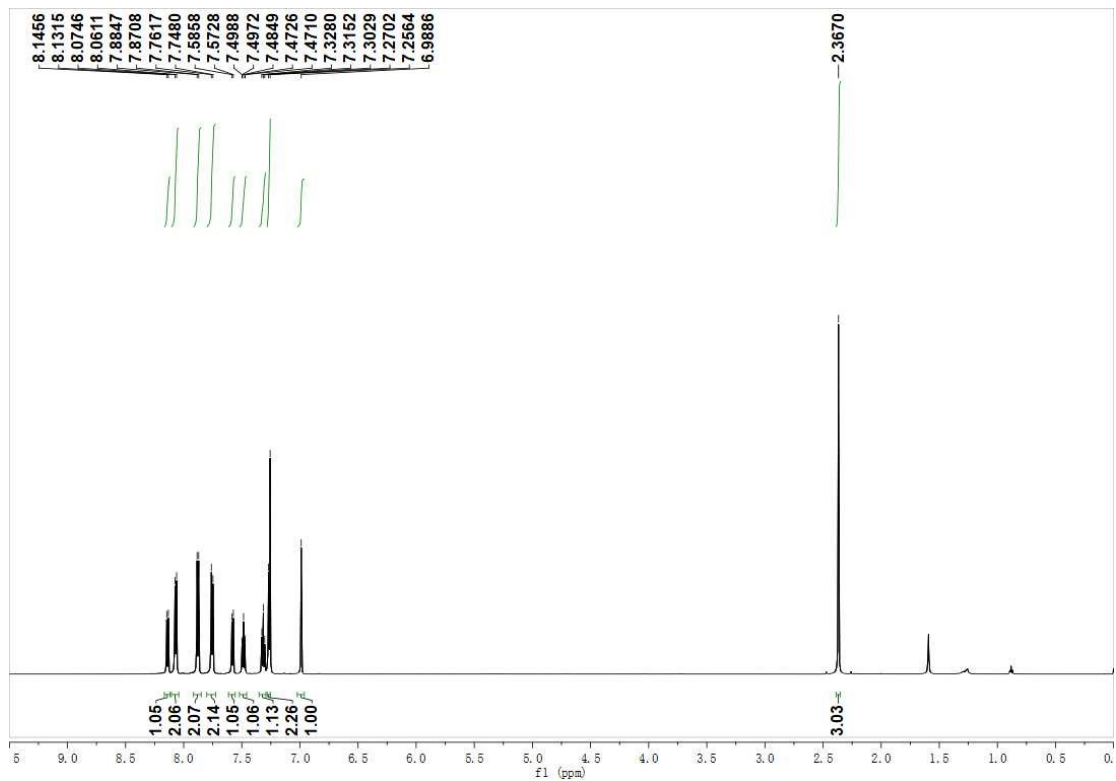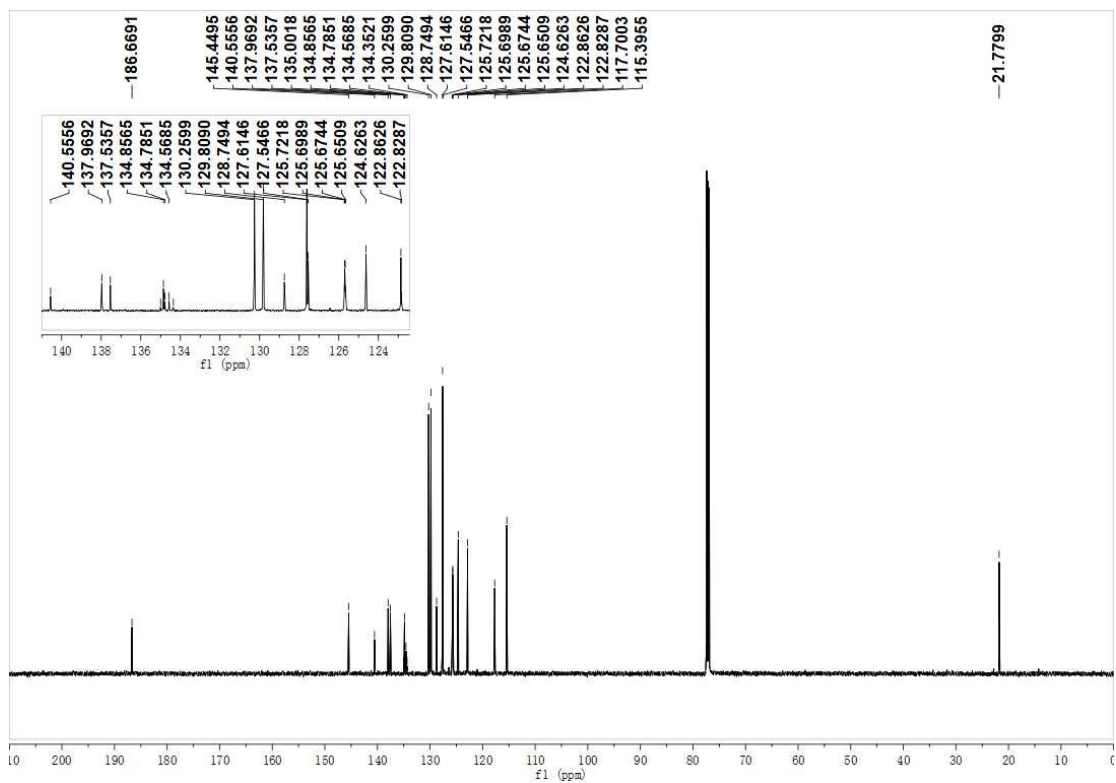

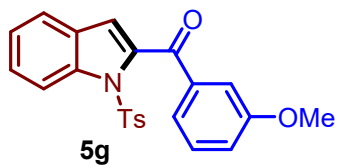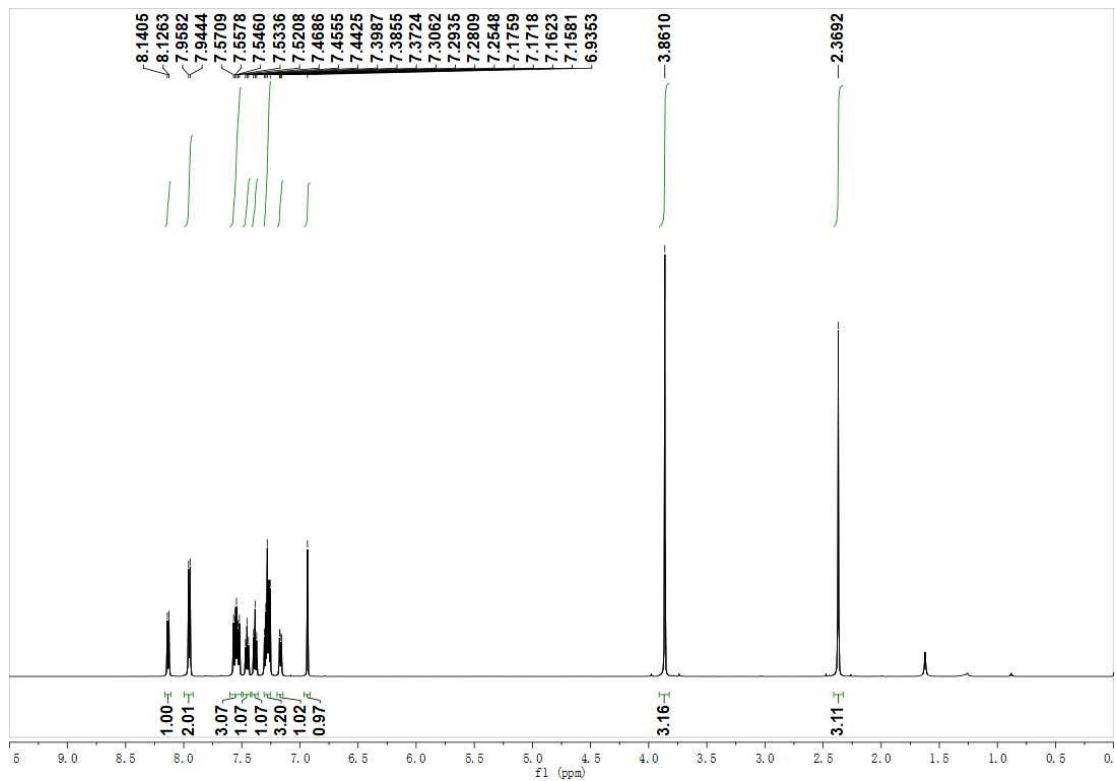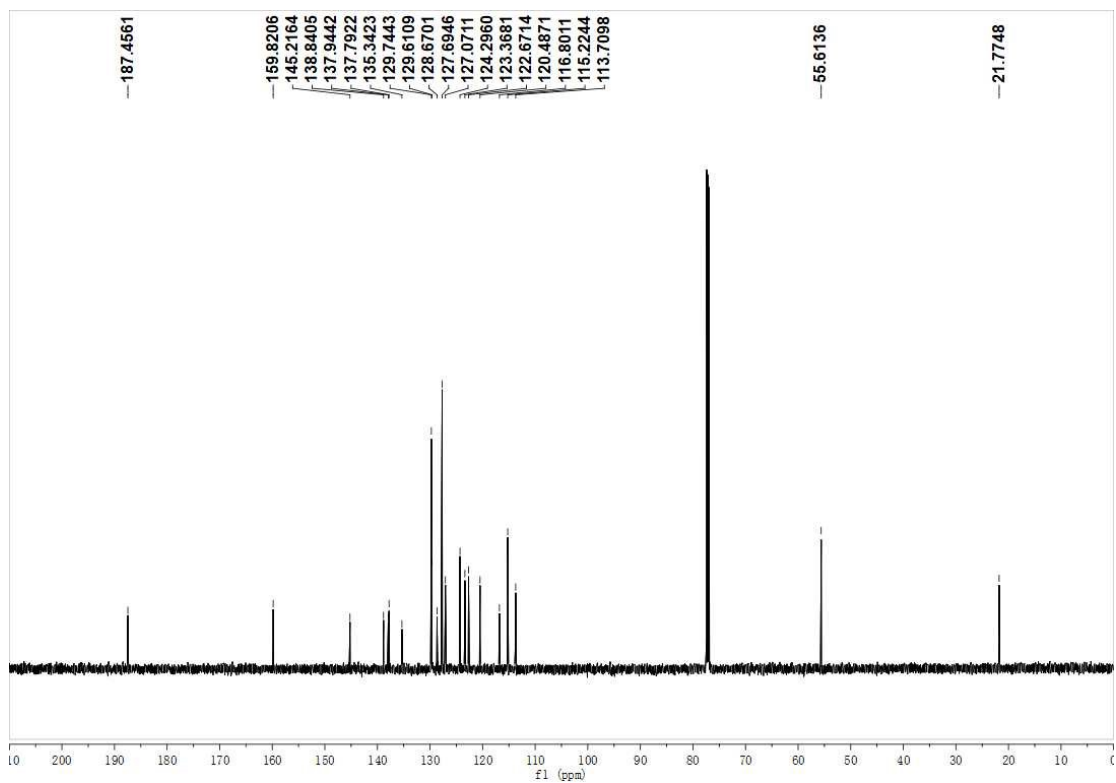

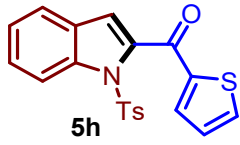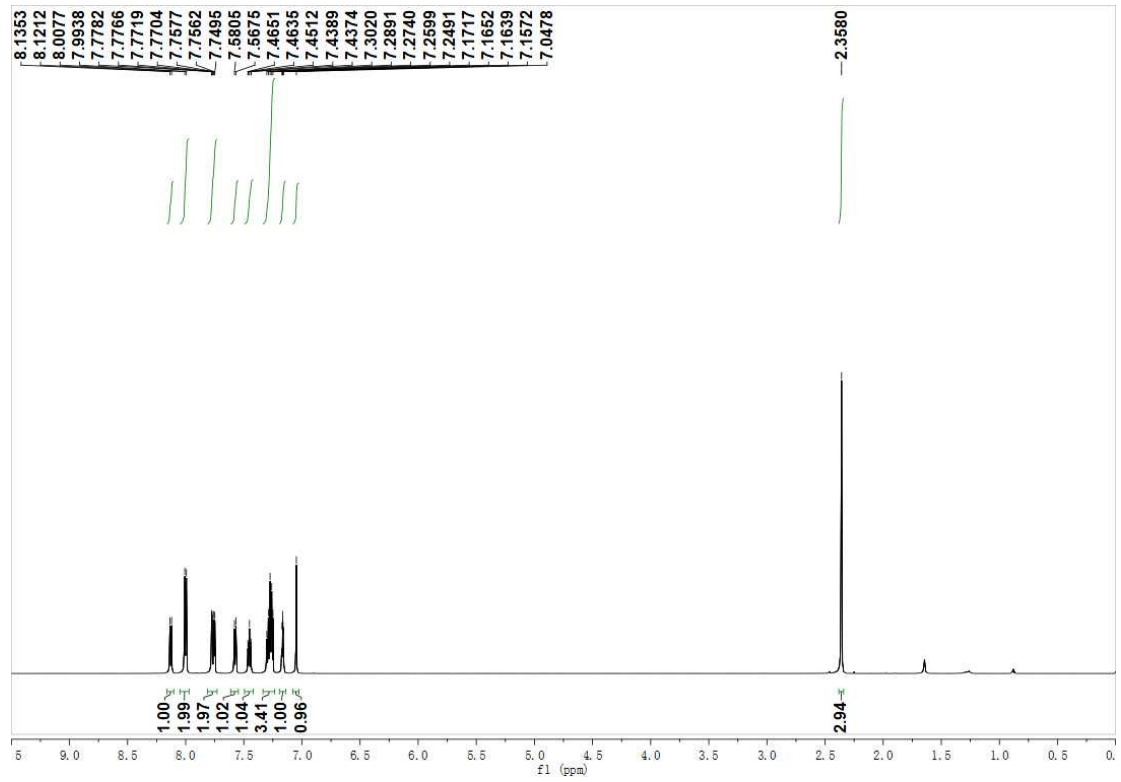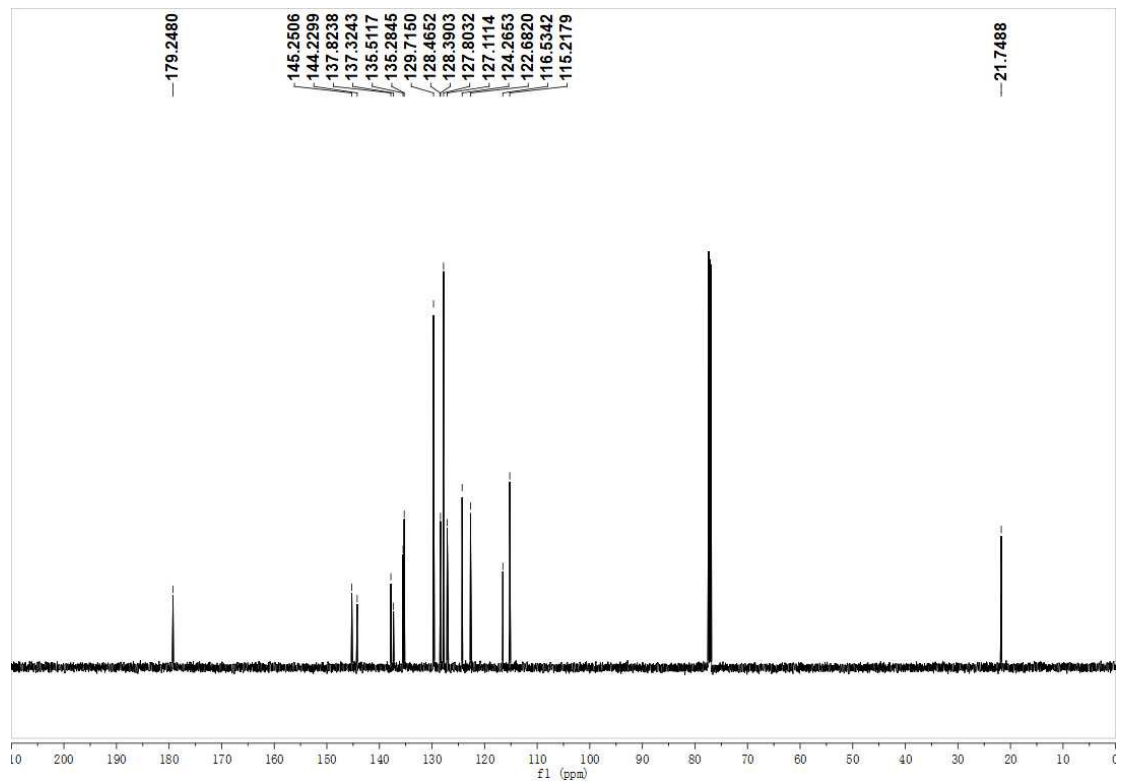



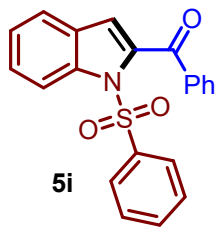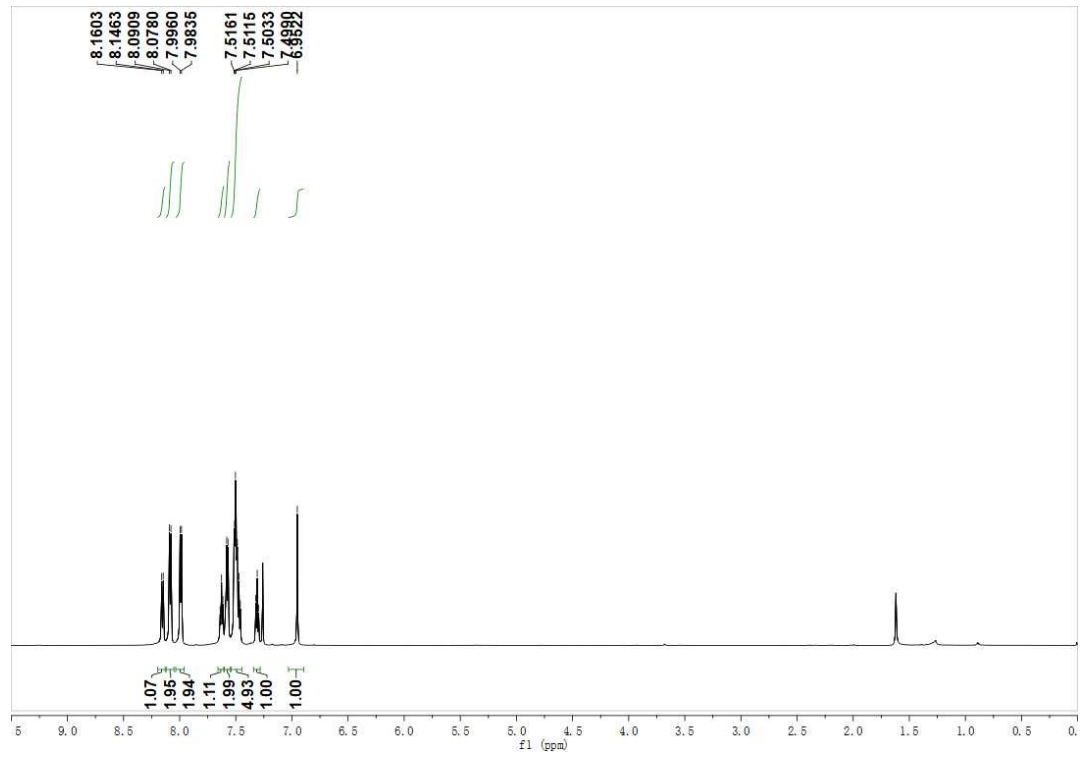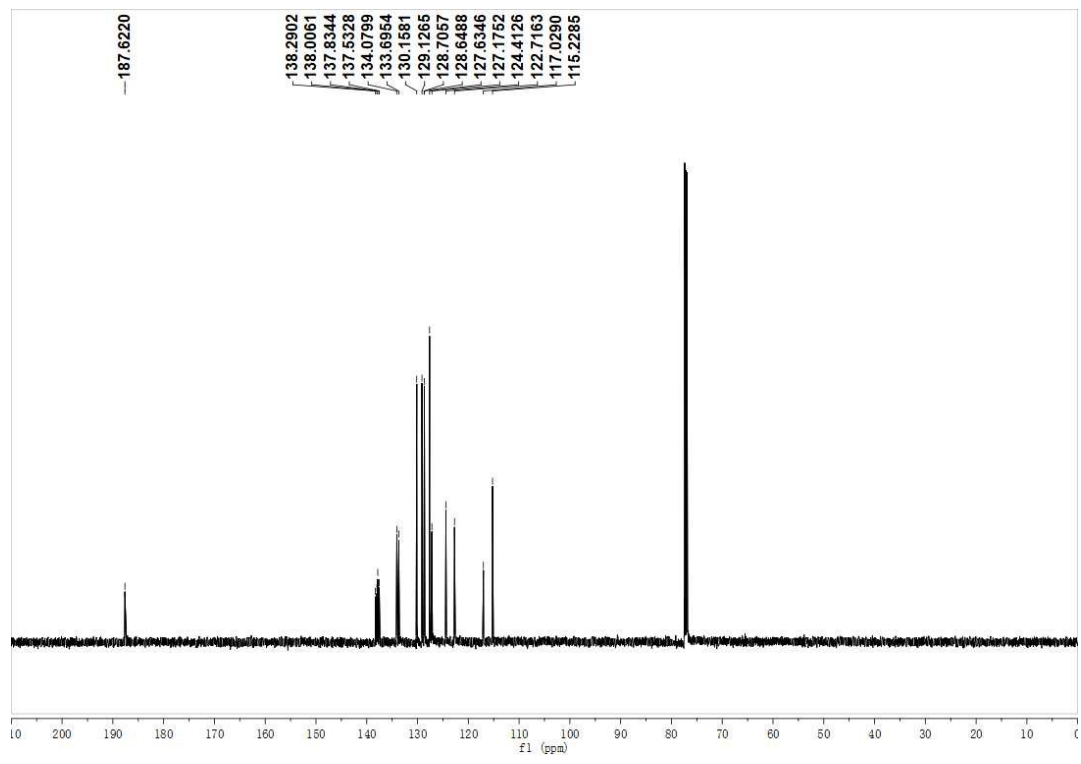

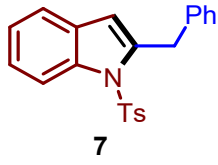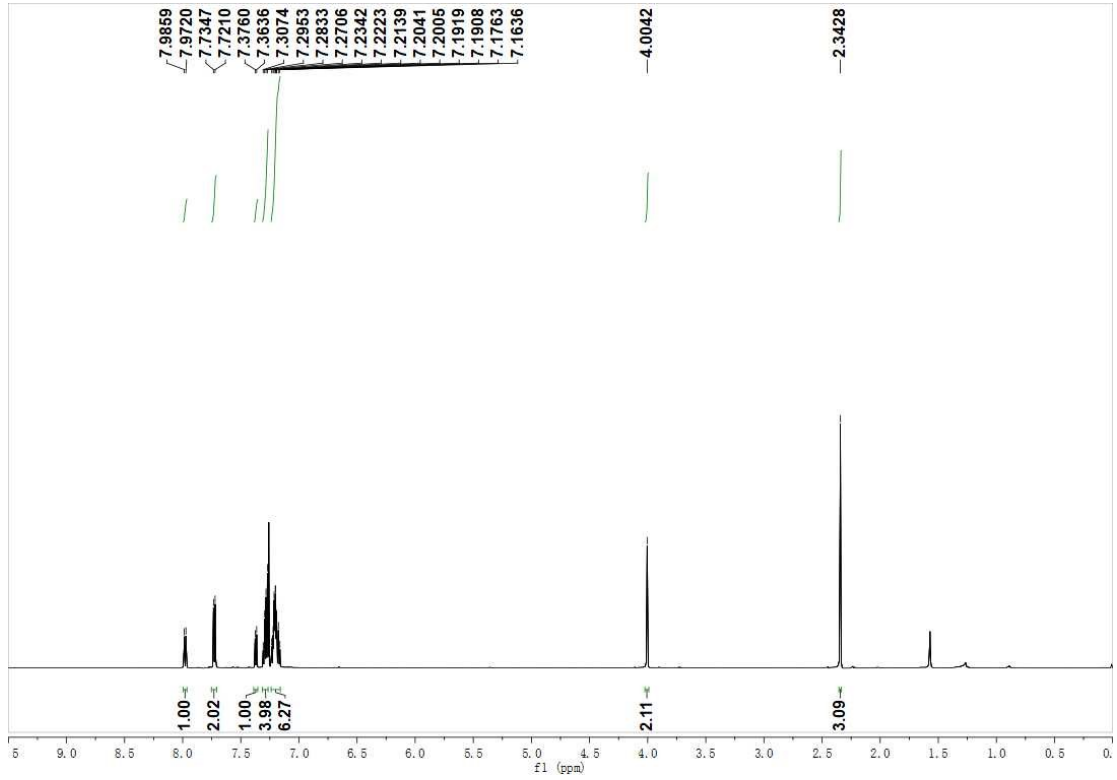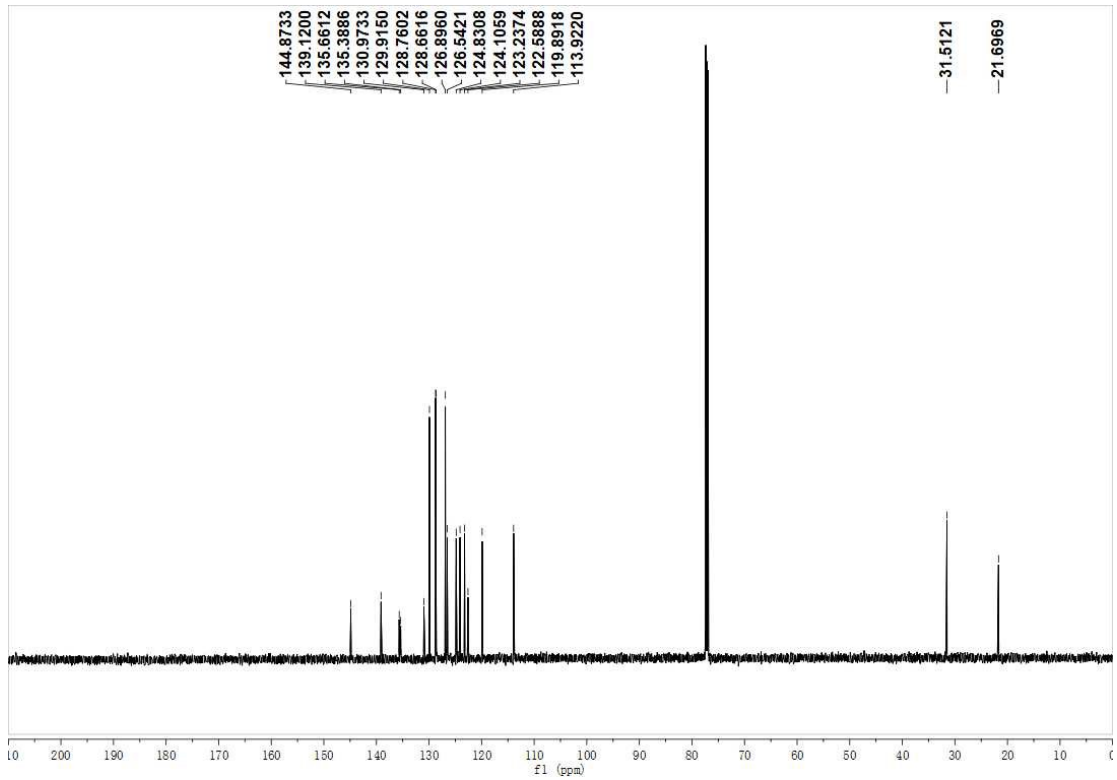

## HPLC Spectra of 3a

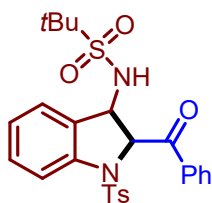

HPLC analysis: 36 % e.e. (Chiralcel IC, 20:80 iPrOH/Hexane, 1.0 mL/min), Rt (minor) = 27.7 min, Rt (major) = 38.8 min

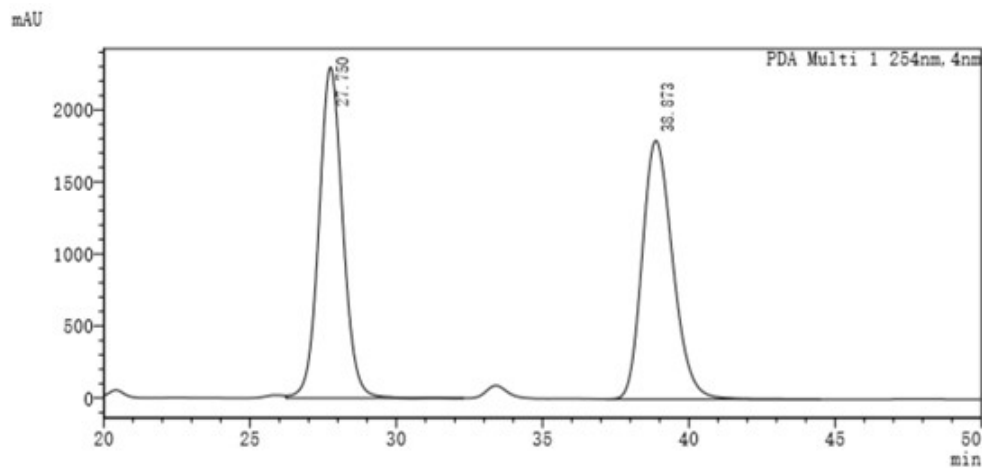

<峰表>

| 峰号 | 保留时间   | 面积        | 高度      | 面积%     | 高度%     |
|----|--------|-----------|---------|---------|---------|
| 1  | 27.750 | 130949311 | 2297612 | 50.089  | 56.142  |
| 2  | 38.873 | 130486039 | 1794893 | 49.911  | 43.858  |
| 总计 |        | 261435350 | 4092505 | 100.000 | 100.000 |

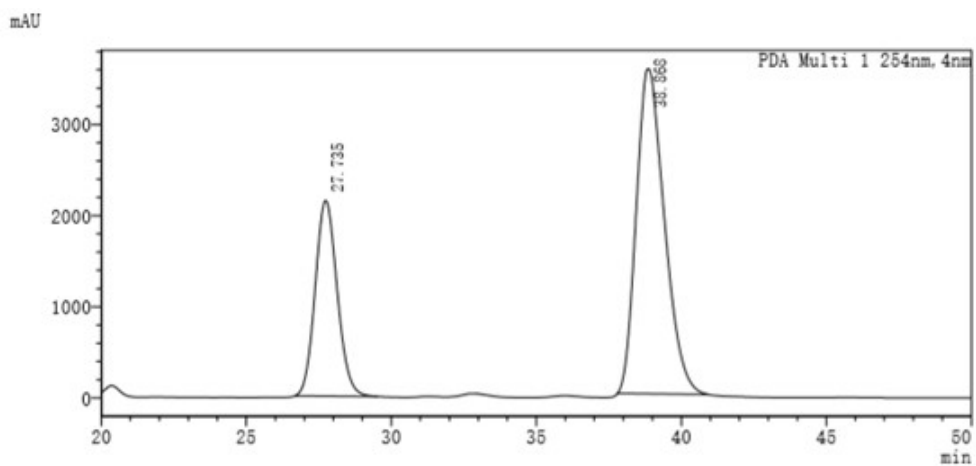

<峰表>

| 峰号 | 保留时间   | 面积        | 高度      | 面积%     | 高度%     |
|----|--------|-----------|---------|---------|---------|
| 1  | 27.735 | 113176887 | 2144229 | 32.024  | 37.554  |
| 2  | 38.868 | 240237213 | 3565530 | 67.976  | 62.446  |
| 总计 |        | 353414100 | 5709759 | 100.000 | 100.000 |
